# Supplementary material for: Functionally Relevant Microsatellite Markers From Chickpea Transcription Factor Genes for Efficient Genotyping Applications and Trait Association Mapping
Source: PubMed Central journal article supplement — DNA Res. 2013 Apr 29;20(4):355–74. doi: 10.1093/dnares/dst015 (PMC3738162; doi:10.1093/dnares/dst015), 2013-04-29
Supplement: supp_dst015_dst015supp_table1.pdf [file supp_dst015_dst015supp_table1.pdf]

**Supplementary Table S1: Chickpea genotypes used in the study and their cultivar types, geographical origin and inferred ancestry coefficients in population genetic structure analysis**

| Sl. No. | Genotypes with Accession No. | Cultivar types                            | Geographical origin    | Inferred population ancestry |
|---------|------------------------------|-------------------------------------------|------------------------|------------------------------|
| 1       | ICC17123                     | <i>Cicer reticulatum</i> Wild             | Turkey                 | Wild (Population Group I)    |
| 2       | ICC17124                     | <i>Cicer reticulatum</i> Wild             | Turkey                 | Wild (Population Group I)    |
| 3       | ICC17160                     | <i>Cicer reticulatum</i> Wild             | Turkey                 | Wild (Population Group I)    |
| 4       | ICC17163                     | <i>Cicer reticulatum</i> Wild             | Turkey                 | Wild (Population Group I)    |
| 5       | ICC7571                      | <i>Cicer arietinum</i> Kabuli landrace    | Israel                 | Wild (Population Group I)    |
| 6       | ICC16796                     | <i>Cicer arietinum</i> Kabuli landrace    | Portugal               | Wild (Population Group I)    |
| 7       | ICCV1                        | <i>Cicer arietinum</i> Desi variety       | Western India          | Desi (Population Group IIa)  |
| 8       | ICCC37                       | <i>Cicer arietinum</i> Desi variety       | Southern India         | Desi (Population Group IIa)  |
| 9       | ICCV88202                    | <i>Cicer arietinum</i> Desi variety       | Northern India         | Desi (Population Group IIa)  |
| 10      | ICCV93952                    | <i>Cicer arietinum</i> Desi variety       | Central India          | Desi (Population Group IIa)  |
| 11      | ICCV93954                    | <i>Cicer arietinum</i> Desi variety       | Southern India         | Desi (Population Group IIa)  |
| 12      | ICCV91106                    | <i>Cicer arietinum</i> Desi variety       | Central India          | Desi (Population Group IIa)  |
| 13      | ICCV92944                    | <i>Cicer arietinum</i> Desi variety       | Central India          | Desi (Population Group IIa)  |
| 14      | ICCL87207                    | <i>Cicer arietinum</i> Desi variety       | Central India          | Desi (Population Group IIa)  |
| 15      | ICC4951                      | <i>Cicer arietinum</i> Desi landrace      | Central India          | Desi (Population Group IIa)  |
| 16      | ICC8933                      | <i>Cicer arietinum</i> Desi genetic stock | Northern India         | Desi (Population Group IIa)  |
| 17      | IC296131                     | <i>Cicer arietinum</i> Desi variety       | Northern India         | Desi (Population Group IIa)  |
| 18      | IC296132                     | <i>Cicer arietinum</i> Desi variety       | Northern India         | Desi (Population Group IIa)  |
| 19      | IC296133                     | <i>Cicer arietinum</i> Desi variety       | Northern India         | Desi (Population Group IIa)  |
| 20      | BGD112                       | <i>Cicer arietinum</i> Desi genetic stock | Northern India         | Desi (Population Group IIa)  |
| 21      | BGD1103                      | <i>Cicer arietinum</i> Desi genetic stock | Northern India         | Desi (Population Group IIa)  |
| 22      | Pusa256                      | <i>Cicer arietinum</i> Desi variety       | Northern India         | Desi (Population Group IIa)  |
| 23      | Pusa547                      | <i>Cicer arietinum</i> Desi variety       | Northern India         | Desi (Population Group IIa)  |
| 24      | BGD72                        | <i>Cicer arietinum</i> Desi genetic stock | Northern India         | Desi (Population Group IIa)  |
| 25      | IC244160                     | <i>Cicer arietinum</i> Desi variety       | Northern India         | Desi (Population Group IIa)  |
| 26      | IC244217                     | <i>Cicer arietinum</i> Desi variety       | Northern India         | Desi (Population Group IIa)  |
| 27      | SBD377                       | <i>Cicer arietinum</i> Desi variety       | Northern India         | Desi (Population Group IIa)  |
| 28      | Pusa2024                     | <i>Cicer arietinum</i> Desi variety       | Northern India         | Desi (Population Group IIa)  |
| 29      | Pusa1103                     | <i>Cicer arietinum</i> Desi variety       | Northern India         | Desi (Population Group IIa)  |
| 30      | ICC14402                     | <i>Cicer arietinum</i> Desi landrace      | ICRISAT                | Desi (Population Group IIa)  |
| 31      | ICC5135                      | <i>Cicer arietinum</i> Desi landrace      | India                  | Desi (Population Group IIa)  |
| 32      | ICC13524                     | <i>Cicer arietinum</i> Desi landrace      | Iran                   | Desi (Population Group IIa)  |
| 33      | ICC13219                     | <i>Cicer arietinum</i> Desi landrace      | Iran                   | Desi (Population Group IIa)  |
| 34      | ICC13187                     | <i>Cicer arietinum</i> Desi landrace      | Iran                   | Desi (Population Group IIa)  |
| 35      | ICCV89314                    | <i>Cicer arietinum</i> Desi variety       | Eastern India          | Desi (Population Group IIb)  |
| 36      | ICCV96970                    | <i>Cicer arietinum</i> Desi variety       | Central India          | Desi (Population Group IIb)  |
| 37      | ICCV94954                    | <i>Cicer arietinum</i> Desi variety       | Central India          | Desi (Population Group IIb)  |
| 38      | ICCV10                       | <i>Cicer arietinum</i> Desi variety       | Southern/Central India | Desi (Population Group IIb)  |
| 39      | ICCV93958                    | <i>Cicer arietinum</i> Desi variety       | Southern India         | Desi (Population Group IIb)  |
| 40      | ICC4958                      | <i>Cicer arietinum</i> Desi landrace      | Central India          | Desi (Population Group IIb)  |
| 41      | ICC3512                      | <i>Cicer arietinum</i> Desi landrace      | Iran                   | Desi (Population Group IIb)  |

| Sl. No. | Genotypes with Accession No. | Cultivar types                                     | Geographical origin  | Inferred population ancestry          |
|---------|------------------------------|----------------------------------------------------|----------------------|---------------------------------------|
| 42      | ICC8950                      | <i>Cicer arietinum Desi</i> landrace               | India                | <i>Desi</i> (Population Group IIb)    |
| 43      | ICC6263                      | <i>Cicer arietinum Desi</i> landrace               | Russia & CISs        | <i>Desi</i> (Population Group IIb)    |
| 44      | ICC283                       | <i>Cicer arietinum Desi</i> landrace               | India                | <i>Desi</i> (Population Group IIb)    |
| 45      | ICC1431                      | <i>Cicer arietinum Desi</i> landrace               | India                | <i>Desi</i> (Population Group IIb)    |
| 46      | ICC4918                      | <i>Cicer arietinum Desi</i> breeding line/cultivar | India                | <i>Desi</i> (Population Group IIb)    |
| 47      | ICC1205                      | <i>Cicer arietinum Desi</i> landrace               | India                | <i>Desi</i> (Population Group IIb)    |
| 48      | ICC1882                      | <i>Cicer arietinum Desi</i> landrace               | India                | <i>Desi</i> (Population Group IIb)    |
| 49      | ICC1356                      | <i>Cicer arietinum Desi</i> landrace               | India                | <i>Desi</i> (Population Group IIb)    |
| 50      | ICCX-810800                  | <i>Cicer arietinum Desi</i> variety                | Northern India       | <i>Desi</i> (Population Group IIb)    |
| 51      | ICCX-820065                  | <i>Cicer arietinum Desi</i> variety                | Western India        | <i>Desi</i> (Population Group IIb)    |
| 52      | ICCV90201                    | <i>Cicer arietinum Desi</i> variety                | Northern India       | <i>Desi</i> (Population Group IIb)    |
| 53      | ICC1392                      | <i>Cicer arietinum Desi</i> landrace               | India                | <i>Desi</i> (Population Group IIb)    |
| 54      | ICC3362                      | <i>Cicer arietinum Desi</i> landrace               | Iran                 | <i>Desi</i> (Population Group IIb)    |
| 55      | ICC2969                      | <i>Cicer arietinum Desi</i> landrace               | Iran                 | <i>Desi</i> (Population Group IIb)    |
| 56      | ICC12037                     | <i>Cicer arietinum Desi</i> landrace               | Mexico               | <i>Desi</i> (Population Group IIb)    |
| 57      | ICC1052                      | <i>Cicer arietinum Desi</i> landrace               | Pakistan             | <i>Desi</i> (Population Group IIb)    |
| 58      | ICC11284                     | <i>Cicer arietinum Desi</i> landrace               | Russia & CISs        | <i>Desi</i> (Population Group IIb)    |
| 59      | ICCV2/ICC12968               | <i>Cicer arietinum Kabuli</i> variety              | Southern India       | <i>Kabuli</i> (Population Group IIIa) |
| 60      | ICCV92311                    | <i>Cicer arietinum Kabuli</i> variety              | Central India        | <i>Kabuli</i> (Population Group IIIa) |
| 61      | ICCV95311                    | <i>Cicer arietinum Kabuli</i> variety              | Southern India       | <i>Kabuli</i> (Population Group IIIa) |
| 62      | ICCV96329                    | <i>Cicer arietinum Kabuli</i> variety              | Southern India       | <i>Kabuli</i> (Population Group IIIa) |
| 63      | ICCV95334                    | <i>Cicer arietinum Kabuli</i> variety              | Central India        | <i>Kabuli</i> (Population Group IIIa) |
| 64      | IC411514                     | <i>Cicer arietinum Kabuli</i> variety              | Northern India       | <i>Kabuli</i> (Population Group IIIa) |
| 65      | Pusa5028                     | <i>Cicer arietinum Kabuli</i> variety              | Northern India       | <i>Kabuli</i> (Population Group IIIa) |
| 66      | IC 449069                    | <i>Cicer arietinum Kabuli</i> variety              | Northern India       | <i>Kabuli</i> (Population Group IIIa) |
| 67      | Pusa5023                     | <i>Cicer arietinum Kabuli</i> variety              | Northern India       | <i>Kabuli</i> (Population Group IIIa) |
| 68      | Pusa2024                     | <i>Cicer arietinum Kabuli</i> variety              | Northern India       | <i>Kabuli</i> (Population Group IIIa) |
| 69      | IC 296376                    | <i>Cicer arietinum Kabuli</i> variety              | Northern India       | <i>Kabuli</i> (Population Group IIIa) |
| 70      | IC 244243                    | <i>Cicer arietinum Kabuli</i> variety              | Northern India       | <i>Kabuli</i> (Population Group IIIa) |
| 71      | ICC5003                      | <i>Cicer arietinum Kabuli</i> variety              | Northern India       | <i>Kabuli</i> (Population Group IIIa) |
| 72      | NA                           | <i>Cicer arietinum Kabuli</i> variety              | Central India        | <i>Kabuli</i> (Population Group IIIa) |
| 73      | BGD1105                      | <i>Cicer arietinum Kabuli</i> genetic stock        | Northern India       | <i>Kabuli</i> (Population Group IIIa) |
| 74      | ICC8740                      | <i>Cicer arietinum Kabuli</i> landrace             | Afghanistan          | <i>Kabuli</i> (Population Group IIIb) |
| 75      | ICC16524                     | <i>Cicer arietinum Kabuli</i> landrace             | Pakistan             | <i>Kabuli</i> (Population Group IIIb) |
| 76      | ICC13523                     | <i>Cicer arietinum Kabuli</i> landrace             | Iran                 | <i>Kabuli</i> (Population Group IIIb) |
| 77      | ICC12328                     | <i>Cicer arietinum Kabuli</i> landrace             | Cyprus               | <i>Kabuli</i> (Population Group IIIb) |
| 78      | ICC7272                      | <i>Cicer arietinum Kabuli</i> landrace             | Algeria              | <i>Kabuli</i> (Population Group IIIb) |
| 79      | ICC11764                     | <i>Cicer arietinum Kabuli</i> landrace             | Chile                | <i>Kabuli</i> (Population Group IIIb) |
| 80      | ICC15697                     | <i>Cicer arietinum Kabuli</i> landrace             | Syrian Arab Republic | <i>Kabuli</i> (Population Group IIIb) |
| 81      | ICC8261                      | <i>Cicer arietinum Kabuli</i> landrace             | Turkey               | <i>Kabuli</i> (Population Group IIIb) |
| 82      | ICC15333                     | <i>Cicer arietinum Kabuli</i> landrace             | Iran                 | <i>Kabuli</i> (Population Group IIIb) |
| 83      | ICC10755                     | <i>Cicer arietinum Kabuli</i> landrace             | Turkey               | <i>Kabuli</i> (Population Group IIIb) |
| 84      | ICC10885                     | <i>Cicer arietinum Kabuli</i> landrace             | Ethiopia             | <i>Kabuli</i> (Population Group IIIb) |
| 85      | ICC9137                      | <i>Cicer arietinum Kabuli</i> landrace             | Iran                 | <i>Kabuli</i> (Population Group IIIb) |

| <b>Sl. No.</b> | <b>Genotypes with Accession No.</b> | <b>Cultivar types</b>                  | <b>Geographical origin</b> | <b>Inferred population ancestry</b>   |
|----------------|-------------------------------------|----------------------------------------|----------------------------|---------------------------------------|
| 86             | ICC15406                            | <i>Cicer arietinum Kabuli</i> landrace | Morocco                    | <i>Kabuli</i> (Population Group IIIb) |
| 87             | ICC8151                             | <i>Cicer arietinum Kabuli</i> landrace | United States of America   | <i>Kabuli</i> (Population Group IIIb) |
| 88             | ICC14199                            | <i>Cicer arietinum Kabuli</i> landrace | Mexico                     | <i>Kabuli</i> (Population Group IIIb) |
| 89             | ICC12824                            | <i>Cicer arietinum Desi</i> landrace   | Ethiopia                   | <i>Kabuli</i> (Population Group IIIb) |
| 90             | ICC12537                            | <i>Cicer arietinum Desi</i> landrace   | Ethiopia                   | <i>Kabuli</i> (Population Group IIIb) |
| 91             | ICC9643                             | <i>Cicer arietinum Desi</i> landrace   | Afghanistan                | <i>Kabuli</i> (Population Group IIIb) |
| 92             | ICC8621                             | <i>Cicer arietinum Desi</i> landrace   | Ethiopia                   | <i>Kabuli</i> (Population Group IIIb) |
| 93             | ICC9895                             | <i>Cicer arietinum Desi</i> landrace   | Afghanistan                | <i>Kabuli</i> (Population Group IIIb) |
| 94             | ICCV95332                           | <i>Cicer arietinum Kabuli</i> variety  | Central India              | <i>Kabuli</i> (Population Group IIIb) |
| 95             | ICCV95333                           | <i>Cicer arietinum Kabuli</i> variety  | Central India              | <i>Kabuli</i> (Population Group IIIb) |
| 96             | ICCV92337                           | <i>Cicer arietinum Kabuli</i> variety  | Central India              | <i>Kabuli</i> (Population Group IIIb) |
