# Supplementary material for: Functionally Relevant Microsatellite Markers From Chickpea Transcription Factor Genes for Efficient Genotyping Applications and Trait Association Mapping
Source: PubMed Central journal article supplement — DNA Res. 2013 Apr 29;20(4):355–74. doi: 10.1093/dnares/dst015 (PMC3738162; doi:10.1093/dnares/dst015), 2013-04-29
Supplement: supp_dst015_dst015supp_table2.pdf [file supp_dst015_dst015supp_table2.pdf]

Supplementary Table S2: Characteristics of 1,269 including 1,108 TFGMS and 161 TFFDMS markers developed from 707 TF genes of chickpea

| NCBI Probe IDs | Chromosomes | Physical positions (bp) | Microsatellite repeat-motifs | Microsatellite repeat length (bp) | Forward Primer sequences (5'-3') | Reverse Primer sequences (5'-3') | ORF position (bp) | Functional domain position (bp) | Functional domain                    | Types of genic microsatellite markers | Actual annealing temperature (°C) | Size (bp) of alleles amplified | Total number of alleles amplified among chickpea varieties | Polymorphic potential monomorphic (M)/polymorphic (P) | R2 value of marker loci showing significant association ( $P \leq 0.05$ ) with three major seed and pod traits |
|----------------|-------------|-------------------------|------------------------------|-----------------------------------|----------------------------------|----------------------------------|-------------------|---------------------------------|--------------------------------------|---------------------------------------|-----------------------------------|--------------------------------|------------------------------------------------------------|-------------------------------------------------------|----------------------------------------------------------------------------------------------------------------|
| PUI16584974    | Ca1         | 11896618                | (GAA) <sub>8</sub>           | 18                                | AGGGTAGCATTACAAGTTGGT            | TAGAGGAAAAATGCCAATGATA           | 46-855            | 54-534                          | Domain of unknown function (DUF1635) | TFGMS1                                | 55.0                              | 140                            | 3                                                          | P                                                     | 0.18                                                                                                           |
| PUI16584975    | Ca6         | 12437191                | (CAG) <sub>8</sub>           | 24                                | AATCTCAGCCTCAAACTCAAT            | GCTGTTGTGATTTTGTGTGT             | 932-3685          | 1307-1615                       | B3                                   | TFGMS2                                | 55.6                              | 147                            | 4                                                          | P                                                     | 0.18                                                                                                           |
| PUI16584976    | Ca1         | 11899327                | (TAA) <sub>5</sub>           | 15                                | ATTGAGCAGTTAGTTCCAACA            | GCATCAGCAAGTAGACAAAT             | 23-1294           | 194-571                         | No apical meristem (NAM)             | TFGMS3                                | 55.1                              | 147                            | 3                                                          | P                                                     | 0.18                                                                                                           |
| PUI16584977    | Ca1         | 11896720                | (AGA) <sub>8</sub>           | 24                                | TCAGGATCTAGTTGGTGTGT             | TTATCGAATGCTTTACTCTGC            | 46-855            | 54-534                          | Domain of unknown function (DUF1635) | TFGMS4                                | 55.0                              | 160                            | 3                                                          | P                                                     | 0.19                                                                                                           |
| PUI16584978    | Ca1         | 389097                  | (TCTCAT) <sub>4</sub>        | 24                                | GGTGCTACTGATTTCATGTT             | AGGAGCATCTTCTCACTTTC             | 41-1297           | 380-691                         | TCP family transcription factor      | TFGMS5                                | 54.4                              | 156                            | 4                                                          | P                                                     | 0.19                                                                                                           |
| PUI16584979    | Ca5         | 10080588                | (TTC) <sub>9</sub>           | 27                                | TGCTATTGTGATTGAGTTGCT            | AGCATGACAAGTTTAAAGCA             | 204-2075          | 702-836                         | Myb DNA binding                      | TFGMS6                                | 55.0                              | 147                            | 4                                                          | P                                                     | 0.19                                                                                                           |
| PUI16584980    | Ca6         | 22249411                | (TTCACA) <sub>5</sub>        | 30                                | CCCACCTTTCTCACTCACTCTT           | ATGGATGATGGAGAGAGAGAG            | 171-1790          | 669-1787                        | GRAS                                 | TFGMS7                                | 56.1                              | 163                            | 4                                                          | P                                                     | 0.20                                                                                                           |
| PUI16584981    | Ca8         | 8841425                 | (AATAAC) <sub>5</sub>        | 30                                | TCACAGAAGCAGAAATCAAGT            | AAACAAGATGACAACTCAC              | 289-2259          | 1753-1893                       | HLH                                  | TFGMS8                                | 55.2                              | 148                            | 3                                                          | P                                                     | 0.22                                                                                                           |
| PUI16584982    | 0           | 0                       | (GAA) <sub>18</sub>          | 54                                | AACTTGTGAGAAAGCACTCC             | ATTCAATCACTCATCACTCAT            | 251-1081          | 614-748                         | bZIP                                 | TFGMS9                                | 55.3                              | 155                            | 6                                                          | P                                                     | 0.21                                                                                                           |
| PUI16584983    | Ca3         | 10489944                | (AACAG) <sub>5</sub>         | 25                                | AGAGAAGAAGTCCAACAATCC            | TCAAAGGTACAAAGAAAGTGC            | 1804-3588         | 3277-3414                       | PHD                                  | TFGMS10                               | 55.0                              | 159                            | 3                                                          | P                                                     | 0.22                                                                                                           |
| PUI16584984    | Ca6         | 8368375                 | (AAAAC) <sub>5</sub>         | 25                                | CCTTGCTTAAAGATACCAAAAC           | AGAGCTTCCAAGTCTCTTCAT            | 494-1411          | 665-826                         | HomeoBox                             | TFGMS11                               | 54.4                              | 179                            | 4                                                          | P                                                     | 0.22                                                                                                           |
| PUI16584985    | Ca1         | 11899142                | (AATCCA) <sub>5</sub>        | 30                                | ATTGAGCAGTTAGTTCCAACA            | GCATCAGCAAGATAGACAAAT            | 23-1294           | 194-571                         | No apical meristem (NAM)             | TFGMS12                               | 55.1                              | 147                            | 4                                                          | P                                                     | 0.22                                                                                                           |
| PUI16584986    | Ca1         | 11905672                | (ACA) <sub>4</sub>           | 12                                | AATGCCAACTGCTCATACAA             | ACCATAATTAATCCCACTATT            | 13-981            | 352-852                         | Domain of unknown function (DUF702)  | TFGMS13                               | 55.0                              | 163                            | 4                                                          | P                                                     | 0.23                                                                                                           |
| PUI16584987    | Ca6         | 6141841                 | (ATT) <sub>8</sub>           | 24                                | TCTTTGCCCTTGCTCATAGTTA           | GGCCCTGTGATGATGGA                | 357-2960          | 852-1157                        | B3                                   | TFGMS14                               | 55.2                              | 121                            | 3                                                          | P                                                     | 0.23                                                                                                           |
| PUI16584988    | Ca3         | 36810456                | (AG) <sub>19</sub>           | 38                                | ACCATTAAACAGTCAACCATG            | CAGATATGTTCTCGATTGAT             | 218-661           | 431-580                         | bZIP                                 | TFGMS15                               | 55.0                              | 153                            | 6                                                          | P                                                     | 0.24                                                                                                           |
| PUI16584989    | Ca7         | 3750508                 | (TCT) <sub>4</sub>           | 12                                | CAAAATGATGCTTATCAAAAC            | GGAGAGATGCTAGACCAAGT             | 8-592             | 245-577                         | AUX-IAA                              | TFGMS16                               | 54.9                              | 152                            | 5                                                          | P                                                     | 0.24                                                                                                           |
| PUI16584990    | Ca1         | 11899241                | (CAA) <sub>5</sub>           | 15                                | TGACAACAGTCTCTTGCTTTT            | GCATCAGCAAGATAGACAAAT            | 23-1294           | 194-571                         | NAM                                  | TFGMS17                               | 54.9                              | 154                            | 3                                                          | P                                                     | 0.25                                                                                                           |
| PUI16584991    | Ca1         | 11896521                | (CTA) <sub>6</sub>           | 18                                | CCACCTGTACTATTCTCTTC             | AAGAGAGATCAGAACTTCCAC            | 46-855            | 54-534                          | Domain of unknown function (DUF1635) | TFGMS18                               | 55.0                              | 151                            | 2                                                          | P                                                     | 0.31                                                                                                           |
| PUI16584992    | Ca7         | 8615627                 | (CTT) <sub>9</sub>           | 27                                | TCGACATGATAACACAAGTCA            | GTCTCTTTTCTTCCCATGT              | 657-1982          | 912-1124                        | TCP                                  | TFGMS19                               | 55.0                              | 163                            | 4                                                          | P                                                     | 0.26                                                                                                           |
| PUI16584993    | Ca7         | 28547368                | (AG) <sub>14</sub>           | 28                                | AGCGTAGGTAAGTAAAGAG              | AAGCTGTCTCTCTAAATGGAAG           | 786-1760          | 975-1211                        | SBP                                  | TFGMS20                               | 54.7                              | 155                            | 4                                                          | P                                                     | 0.26                                                                                                           |
| PUI16584994    | Ca1         | 11902768                | (CTC) <sub>4</sub>           | 12                                | CCCGAAAATATAAATCCAGA             | TAGGAGGATGAAAAGGAAAGAG           | 159-3215          | 492-728                         | SBP                                  | TFGMS21                               | 55.9                              | 175                            | 2                                                          | P                                                     | 0.25                                                                                                           |
| PUI16584995    | Ca5         | 30587245                | (CTTCTC) <sub>4</sub>        | 24                                | TTTTCATGCTTACTTGTGATGG           | CAAGAGCAGCAAGCAAGAGAG            | 333-4583          | 1497-1719                       | SWIB                                 | TFGMS22                               | 54.8                              | 157                            | NA                                                         | NA                                                    | NA                                                                                                             |
| PUI16584996    | 0           | 0                       | (ATA) <sub>7</sub>           | 21                                | AACCATGCAACTAAACAATC             | GCTAACATGGTAACCTCACTCA           | 437-1648          | 1285-1438                       | F0F1 ATP synthase                    | TFGMS23                               | 54.4                              | 153                            | NA                                                         | NA                                                    | NA                                                                                                             |
| PUI16584997    | Ca1         | 390435                  | (ATTCTC) <sub>5</sub>        | 30                                | CAACAACAACAACAAGAAATCA           | AAGGTGTTGTTGATGAGAATG            | 41-1297           | 380-691                         | TCP                                  | TFGMS24                               | 54.7                              | 153                            | NA                                                         | NA                                                    | NA                                                                                                             |
| PUI16584998    | 0           | 0                       | (TQ) <sub>14</sub>           | 28                                | GGTAGAGGATGAGGATGAGTT            | TTTGTGGATGTTAAAGTTTG             | 1553-2188         | 1563-2095                       | Ras                                  | TFGMS25                               | 54.8                              | 151                            | NA                                                         | NA                                                    | NA                                                                                                             |
| PUI16584999    | Ca6         | 55329451                | (TAA) <sub>7</sub>           | 21                                | TCTCATCATCTATTTTGGAA             | GGTTTGTGCTTGATAGAAGA             | 522-1952          | 1269-1388                       | HomeoBox                             | TFGMS26                               | 54.8                              | 139                            | NA                                                         | NA                                                    | NA                                                                                                             |
| PUI16585000    | Ca4         | 4799223                 | (GATCA) <sub>6</sub>         | 36                                | TGCAACAGTACAGAAAGCTATGG          | GATATAGCAGCAAGCAAGATAG           | 159-3803          | 2883-3098                       | Helicase                             | TFGMS27                               | 55.1                              | 156                            | NA                                                         | NA                                                    | NA                                                                                                             |
| PUI16585001    | Ca7         | 889264                  | (ATT) <sub>7</sub>           | 21                                | TATAAAGTGCTTGTGCAATGA            | ATCACTGCAGATCGAACTT              | 99-1076           | 555-731                         | WRKY                                 | TFGMS28                               | 54.7                              | 149                            | NA                                                         | NA                                                    | NA                                                                                                             |
| PUI16585002    | Ca5         | 47007215                | (CCATA) <sub>4</sub>         | 20                                | AAAAACAACCTCTCTCTCC              | TATCTTGAGAAAGCAACGGATA           | 540-1652          | 969-1121                        | Med26                                | TFGMS29                               | 55.1                              | 143                            | NA                                                         | NA                                                    | NA                                                                                                             |
| PUI16585003    | Ca4         | 36842734                | (CAG) <sub>8</sub>           | 24                                | CTAAAGAATGGAATTTGGGATT           | TAGGAGGATGAAAAGGAAAGAG           | 159-3215          | 492-728                         | SBP                                  | TFGMS30                               | 55.0                              | 153                            | 5                                                          | P                                                     | NA                                                                                                             |
| PUI16585004    | Ca3         | 25672196                | (CAA) <sub>7</sub>           | 21                                | TCTTACACCAAAACAACAA              | TGTTGTTGTTGTTGTTGAAGA            | 199-1638          | 1063-1200                       | HLH                                  | TFGMS31                               | 54.3                              | 154                            | NA                                                         | NA                                                    | NA                                                                                                             |
| PUI16585005    | Ca2         | 354109                  | (GA) <sub>13</sub>           | 26                                | ATGGAGGCGAATATATAGGAG            | TTTTAAGAAACAACCTCGCTTC           | 114-1025          | 699-1016                        | DUF260                               | TFGMS32                               | 55.1                              | 151                            | 1                                                          | M                                                     | NSA                                                                                                            |
| PUI16585006    | Ca7         | 41712747                | (ACA) <sub>4</sub>           | 12                                | AATGCCAACTGCTCATACAA             | CAGCATCTTGATGACAGAAGC            | 13-981            | 352-852                         | DUF702                               | TFGMS33                               | 55.0                              | 163                            | 1                                                          | M                                                     | NSA                                                                                                            |
| PUI16585007    | Ca5         | 166458                  | (TAA) <sub>5</sub>           | 15                                | ATTGAGCAGTTAGTTCCAACA            | AGCTGCCTTATTAGAGTGTC             | 23-1294           | 194-571                         | NAM                                  | TFGMS34                               | 55.1                              | 147                            | 1                                                          | M                                                     | NSA                                                                                                            |
| PUI16585008    | Ca6         | 51148047                | (ATT) <sub>13</sub>          | 12                                | CATAAGCATGGGTTTTACAT             | CCTTGTTTCGCCTTCTATTAT            | 1078-1458         | 1215-1362                       | HMG-BOX                              | TFGMS35                               | 54.4                              | 149                            | 1                                                          | M                                                     | NSA                                                                                                            |
| PUI16585009    | Ca5         | 30587088                | (TCTTCG) <sub>3</sub>        | 18                                | TCTTTATCTTCTGCAAAACCA            | TTGATGGTAGAGCAAGAACAT            | 333-4583          | 1497-1719                       | SWIB                                 | TFGMS36                               | 55.3                              | 149                            | 1                                                          | M                                                     | NSA                                                                                                            |
| PUI16585010    | Ca5         | 30587088                | (TCTTCG) <sub>3</sub>        | 18                                | TCTTTATCTTCTGCAAAACCA            | TTGATGGTAGAGCAAGAACAT            | 332-4186          | 1101-1323                       | SWIB                                 | TFGMS37                               | 55.3                              | 149                            | 1                                                          | M                                                     | NSA                                                                                                            |
| PUI16585011    | Ca2         | 2427727                 | (CCA) <sub>4</sub>           | 12                                | AATCCCTAACTGTTCTCAAC             | GAGAATAGAGCGAGTGCTCTG            | 1274-6823         | 4026-4165                       | PHD                                  | TFGMS38                               | 55.1                              | 147                            | 1                                                          | M                                                     | NSA                                                                                                            |
| PUI16585012    | Ca2         | 2427727                 | (CCG) <sub>5</sub>           | 15                                | AATCCCTAACTGTTCTCAAC             | GAGAATAGAGCGAGTGCTCTG            | 1274-6823         | 4026-4165                       | PHD                                  | TFGMS39                               | 55.1                              | 147                            | 1                                                          | M                                                     | NSA                                                                                                            |
| PUI16585013    | 0           | 0                       | (TGT) <sub>5</sub>           | 15                                | TTAAACCATTTCTCAGTCTTCG           | GGAGGTGAATATTCTTCCAAT            | 261-7523          | 5971-6343                       | SET                                  | TFGMS40                               | 54.7                              | 149                            | 1                                                          | M                                                     | NSA                                                                                                            |
| PUI16585014    | Ca7         | 4520174                 | (CT) <sub>7</sub>            | 14                                | TTTAACTCGCGCAGCTCCTA             | TAAACCGCAAAAGCTGAGGT             | 208-1902          | 306-1209                        | Pyrradox                             | TFGMS41                               | 60.0                              | 265                            | 1                                                          | M                                                     | NSA                                                                                                            |
| PUI16585015    | Ca5         | 38591946                | (ATC) <sub>4</sub>           | 12                                | CTGTACCATCTGAAACACCAT            | TCCTATAAGCAACAAACCAA             | 653-3472          | 2851-3211                       | JmjC                                 | TFGMS42                               | 55.0                              | 148                            | 1                                                          | M                                                     | NSA                                                                                                            |
| PUI16585016    | Ca7         | 36417403                | (CAA) <sub>4</sub>           | 12                                | AATTAGGCCTGATCTTGTTGTT           | ACACAGCCTAACAACCTTACG            | 3506-7105         | 4535-4777                       | Helicase_c                           | TFGMS43                               | 55.5                              | 154                            | 1                                                          | M                                                     | NSA                                                                                                            |
| PUI16585017    | Ca7         | 36421031                | (CAG) <sub>4</sub>           | 12                                | AGTTAGGGTTTGAATCTTTGC            | TGAGAAATTTGACTCCCAAA             | 3506-7105         | 4535-4777                       | Helicase_c                           | TFGMS44                               | 55.2                              | 170                            | 1                                                          | M                                                     | NSA                                                                                                            |
| PUI16585018    | 0           | 0                       | (AG) <sub>6</sub>            | 12                                | TGTGAGTGAATGAAGAACA              | TCAGACATAGTAGCCCAAGAA            | 431-1837          | 1454-1639                       | RPM                                  | TFGMS45                               | 54.3                              | 151                            | 1                                                          | M                                                     | NSA                                                                                                            |
| PUI16585019    | 0           | 0                       | (CAA) <sub>5</sub>           | 15                                | CAACAACACCTTCTTCAACTG            | TTTTGTTGTGAGATGAGTGTG            | 431-1837          | 1454-1639                       | RPM                                  | TFGMS46                               | 54.9                              | 157                            | 1                                                          | M                                                     | NSA                                                                                                            |
| PUI16585020    | Ca5         | 11382482                | (ATT) <sub>5</sub>           | 15                                | TGCAATCTTTCAAAGACGATT            | CCTCATTCATCATAAAGCAGC            | 208-2628          | 1597-1782                       | RPM                                  | TFGMS47                               | 55.4                              | 148                            | 1                                                          | M                                                     | NSA                                                                                                            |
| PUI16585021    | 0           | 0                       | (CAA) <sub>5</sub>           | 15                                | CAACAACACCTTCTTCAACTG            | TTTTGTTGTGAGATGAGTGTG            | 406-1812          | 1429-1614                       | RPM                                  | TFGMS48                               | 54.9                              | 157                            | 1                                                          | M                                                     | NSA                                                                                                            |
| PUI16585022    | Ca4         | 35416937                | (AC) <sub>6</sub>            | 12                                | GAACAACCAATAGCCATAAA             | AAACAACCTAACCGCGTAAC             | 1046-1738         | 1478-1642                       | TCP                                  | TFGMS49                               | 54.6                              | 168                            | 1                                                          | M                                                     | NSA                                                                                                            |
| PUI16585023    | Ca4         | 35416937                | (AT) <sub>7</sub>            | 14                                | GAACAACCAATAGCCATAAA             | ATTACGTTCTAGTACCAAGACA           | 1046-1738         | 1478-1642                       | TCP                                  | TFGMS50                               | 54.6                              | 168                            | 1                                                          | M                                                     | NSA                                                                                                            |
| PUI16585024    | Ca6         | 15321264                | (CTT) <sub>5</sub>           | 15                                | TTTGAATGGCAACCATGAT              | CTATTGCTCCTCGGTCCAA              | 139-1761          | 264-1359                        | MFS                                  | TFGMS51                               | 59.8                              | 201                            | 1                                                          | M                                                     | NSA                                                                                                            |
| PUI16585025    | Ca6         | 1843362                 | (AAG) <sub>5</sub>           | 15                                | CACCACAACAGAACACATAA             | TTGTGAAGGTGTTTGTGAAT             | 129-2029          | 1379-1636                       | DUF573                               | TFGMS52                               | 54.5                              | 149                            | 1                                                          | M                                                     | NSA                                                                                                            |
| PUI16585026    | Ca5         | 46178268                | (CTT) <sub>5</sub>           | 15                                | CCAATCTCTGCTCTCTTAA              | GATGGACCACAGTCAATAGAA            | 146-1984          | 254-634                         | NAM                                  | TFGMS53                               | 55.3                              | 141                            | 1                                                          | M                                                     | NSA                                                                                                            |
| PUI16585027    | Ca6         | 22174835                | (ACA) <sub>4</sub>           | 12                                | TGAGGAAGTTGAAGAGCTGAA            | AAAGACATCATCTGTTGCTGA            | 91-1575           | 124-402                         | HSF DNA bind                         | TFGMS54                               | 55.1                              | 153                            | 1                                                          | M                                                     | NSA                                                                                                            |
| PUI16585028    | Ca1         | 20825850                | (ACA) <sub>5</sub>           | 15                                | ACAACAACCATCACATTTTTC            | TCGAACGCTTGGTAGTAGTAG            | 114-1697          | 1049-1271                       | SWIB                                 | TFGMS55                               | 55.0                              | 155                            | 1                                                          | M                                                     | NSA                                                                                                            |
| PUI16585029    | Ca1         | 20825909                | (ACT) <sub>4</sub>           | 12                                | ATCAACATGTTAACCAAGTGC            | TTAAAGGCAGATGTTGGTTA             | 114-1697          | 1049-1271                       | SWIB                                 | TFGMS56                               | 55.2                              | 157                            | 1                                                          | M                                                     | NSA                                                                                                            |
| PUI16585030    | 0           | 0                       | (CAT) <sub>4</sub>           | 12                                | CAAAAAGCATGTTTATGAGAG            | TTCAACCACTTCAGTTGTTAT            | 437-1648          | 1285-1438                       | F0F1 ATP synthase                    | TFGMS57                               | 54.5                              | 170                            | 1                                                          | M                                                     | NSA                                                                                                            |
| PUI16585031    | 0           | 0                       | (TCT) <sub>6</sub>           | 18                                | GGCCTTTGTAGTACCTCTCTT            | TGGTGATGAGTTTGGATTCT             | 437-1648          | 1285-1438                       | F0F1 ATP synthase                    | TFGMS58                               | 54.4                              | 188                            | 1                                                          | M                                                     | NSA                                                                                                            |
| PUI16585032    | Ca4         | 23555131                | (ATT) <sub>5</sub>           | 15                                | CTCATTTGGCATAAACTTTG             | CTAATTTCACTGCTGGTTTG             | 1591-2691         | 1813-2232                       | POX                                  | TFGMS59                               | 55.2                              | 152                            | 1                                                          | M                                                     | NSA                                                                                                            |

| NCBI Probe IDs | Chromosomes | Physical positions (bp) | Microsatellite repeat-motifs | Microsatellite repeat length (bp) | Forward Primer sequences (5'-3') | Reverse Primer sequences (5'-3') | ORF position (bp) | Functional domain position (bp) | Functional domain | Types of genic microsatellite markers | Actual annealing temperature (°C) | Size (bp) of alleles amplified | Total number of alleles amplified among chickpea varieties | Polymorphic potential monomorphic (M)/polymorphic (P) | R2 value of marker loci showing significant association ( $P \leq 0.05$ ) with three major seed and pod traits |
|----------------|-------------|-------------------------|------------------------------|-----------------------------------|----------------------------------|----------------------------------|-------------------|---------------------------------|-------------------|---------------------------------------|-----------------------------------|--------------------------------|------------------------------------------------------------|-------------------------------------------------------|----------------------------------------------------------------------------------------------------------------|
| PUIID16585033  | 0           | 0                       | (TTC)7                       | 21                                | TTTCCATCCACAGAAGAGGC             | AATGAGGATGATGCAGAGGG             | 493-1284          | 282-411                         | G-patch           | TFGMS60                               | 60.2                              | 126                            | 1                                                          | M                                                     | NSA                                                                                                            |
| PUIID16585034  | Ca7         | 35320563                | (CAC)4                       | 12                                | CGTATTACCAATCAAAAATGCG           | TAAGGTGAATGGGTTTACTCT            | 127-1851          | 967-1197                        | PWWP              | TFGMS61                               | 55.0                              | 151                            | 1                                                          | M                                                     | NSA                                                                                                            |
| PUIID16585035  | Ca7         | 5352133                 | (TCTCT)3                     | 15                                | AACACACAACACACAGTTCTCG           | AGTGATGATTGAATTGAGGTTG           | 597-2036          | 1059-1139                       | ZICCH             | TFGMS62                               | 55.1                              | 154                            | 1                                                          | M                                                     | NSA                                                                                                            |
| PUIID16585036  | Ca5         | 36138551                | (TGGTGT)3                    | 18                                | CAAGAGAAGGTAGTCCTGACA            | GGCAAATGAGACAAATTCATA            | 2-1351            | 592-771                         | AP2               | TFGMS63                               | 54.9                              | 154                            | 1                                                          | M                                                     | NSA                                                                                                            |
| PUIID16585037  | Ca3         | 37789311                | (GAA)5                       | 15                                | TACATGTTTCAGCACAGCTAGA           | TCTTCTTCTTTCGCTCTCTTCT           | 1350-2753         | 2155-2292                       | PHD               | TFGMS64                               | 54.7                              | 150                            | 1                                                          | M                                                     | NSA                                                                                                            |
| PUIID16585038  | Ca2         | 15303660                | (GAA)6                       | 18                                | AGAAGAGGACGAGAAGAAGA             | TCTTCTTCTTTCGCTCTCTTCT           | 1350-2753         | 2155-2292                       | PHD               | TFGMS65                               | 55.1                              | 138                            | 1                                                          | M                                                     | NSA                                                                                                            |
| PUIID16585039  | Ca3         | 37789311                | (GAT)5                       | 15                                | TACATGTTTCAGCACAGCTAGA           | TCTTCTTCTTTCGCTCTCTTCT           | 1350-2753         | 2155-2292                       | PHD               | TFGMS66                               | 54.7                              | 150                            | 1                                                          | M                                                     | NSA                                                                                                            |
| PUIID16585040  | Ca3         | 37789311                | (GAT)5                       | 15                                | TACATGTTTCAGCACAGCTAGA           | GAACCCCTTTTCTTAAATTGC            | 1804-3588         | 3277-3414                       | PHD               | TFGMS67                               | 54.7                              | 150                            | 1                                                          | M                                                     | NSA                                                                                                            |
| PUIID16585041  | Ca3         | 10489930                | (GT)7                        | 14                                | ACAATGCATTTTGTGAAACAG            | TCTTCTTCTTTCGCTCTCTTCT           | 1804-3588         | 3277-3414                       | PHD               | TFGMS68                               | 55.2                              | 149                            | 1                                                          | M                                                     | NSA                                                                                                            |
| PUIID16585042  | Ca5         | 27041784                | (ATCTC)3                     | 15                                | GTCTCTCCATATCCTTGAACA            | ACGAACACGGGAAAAATAC              | 218-1555          | 1397-1549                       | Myb               | TFGMS69                               | 54.2                              | 166                            | 1                                                          | M                                                     | NSA                                                                                                            |
| PUIID16585043  | Ca4         | 43886809                | (ATAC)3                      | 12                                | CTAAACTACAAACCCTCAAT             | CTTACTACCCGATCCTAACT             | 660-1991          | 725-845                         | HomeoBox          | TFGMS70                               | 55.0                              | 144                            | 1                                                          | M                                                     | NSA                                                                                                            |
| PUIID16585044  | Ca7         | 33643335                | (TCA)5                       | 15                                | AAAGACTTGGTGTGTTTGAA             | GTTTGTGTTGGACATCAAGT             | 324-1505          | 1044-1139                       | AP2               | TFGMS71                               | 54.9                              | 150                            | 1                                                          | M                                                     | NSA                                                                                                            |
| PUIID16585045  | Ca1         | 10976038                | (AAC)4                       | 12                                | CTTCAAGTCAGAAACAGAAC             | TTACTCTGCTGTGAACCACT             | 67-1317           | 1114-1251                       | HLH               | TFGMS72                               | 54.1                              | 148                            | 1                                                          | M                                                     | NSA                                                                                                            |
| PUIID16585046  | Ca1         | 10976038                | (AAG)4                       | 12                                | CTTCAAGTCAGAAACAGAAC             | TTACTCTGCTGTGAACCACT             | 67-1317           | 1114-1251                       | HLH               | TFGMS73                               | 54.1                              | 148                            | 1                                                          | M                                                     | NSA                                                                                                            |
| PUIID16585047  | Ca1         | 10973305                | (ATGT)3                      | 12                                | GCTGTAGGTTACACTTCTTCA            | GCTTACTTACCACATAGACTTTT          | 67-1317           | 1114-1251                       | HLH               | TFGMS74                               | 54.6                              | 117                            | 1                                                          | M                                                     | NSA                                                                                                            |
| PUIID16585048  | Ca6         | 57679651                | (CAA)5                       | 15                                | TGAATCAAACACGTGCGAAT             | GCGAGCATCATTTTGTGAGA             | 281-1648          | 489-1221                        | TBC               | TFGMS75                               | 60.1                              | 275                            | 1                                                          | M                                                     | NSA                                                                                                            |
| PUIID16585049  | Ca8         | 4226976                 | (GGT)5                       | 15                                | GAGTTGGTGGGTTTCTAAAG             | ACCACACAGTTTCAACAATC             | 98-835            | 182-277                         | HSF DNA bind      | TFGMS76                               | 55.6                              | 156                            | 1                                                          | M                                                     | NSA                                                                                                            |
| PUIID16585050  | Ca4         | 4285515                 | (ATCT)3                      | 12                                | TGTTGTAGATTTGTCTATGTTGC          | AAGGATAAATCGTGTCCTA              | 382-4173          | 1546-1896                       | Junjc             | TFGMS77                               | 54.7                              | 148                            | 1                                                          | M                                                     | NSA                                                                                                            |
| PUIID16585051  | Ca7         | 8464653                 | (GGTGT)3                     | 18                                | GAGAAGAAATGGAGGGAGATA            | CCACTTGTATTGACACATCCA            | 171-1229          | 801-1181                        | NAM               | TFGMS78                               | 55.0                              | 169                            | 1                                                          | M                                                     | NSA                                                                                                            |
| PUIID16585052  | Ca4         | 7384447                 | (TAG)6                       | 18                                | ATTTGGATGAATAAGTGGGATT           | ATATCATCATCTTCCCAATCA            | 171-1229          | 801-1181                        | NAM               | TFGMS79                               | 55.0                              | 148                            | 1                                                          | M                                                     | NSA                                                                                                            |
| PUIID16585053  | Ca6         | 3867135                 | (AAC)5                       | 15                                | CTATACACTTCGGTGCTTCTC            | TGAGTATTCAACCATTCAGC             | 95-1465           | 233-679                         | NAM               | TFGMS80                               | 54.3                              | 151                            | 1                                                          | M                                                     | NSA                                                                                                            |
| PUIID16585054  | Ca6         | 3867428                 | (ATGA)3                      | 12                                | TCATGTGGAAAAGAGAAAGA             | GCAATATTGGAAATCGAGTGT            | 95-1465           | 233-679                         | NAM               | TFGMS81                               | 55.1                              | 151                            | 1                                                          | M                                                     | NSA                                                                                                            |
| PUIID16585055  | Ca6         | 3867774                 | (CAG)6                       | 18                                | CCAATCCAATCTCAACTATCA            | GAGAGTCTTAGTGCGTCTCC             | 95-1465           | 233-679                         | NAM               | TFGMS82                               | 55.2                              | 149                            | 1                                                          | M                                                     | NSA                                                                                                            |
| PUIID16585056  | Ca2         | 14768136                | (TGTGG)3                     | 15                                | GATGATTCATGGTTTTCTTGTG           | CCACCCTTATCATCAGAGAAAT           | 277-1095          | 439-546                         | Cir               | TFGMS83                               | 54.7                              | 180                            | 1                                                          | M                                                     | NSA                                                                                                            |
| PUIID16585057  | Ca1         | 48004455                | (CAJA)4                      | 12                                | TCAGAGTAAACAGACACAACG            | CGATGCAAGTTTTAGAGAGAG            | 709-3783          | 1429-1518                       | PHD               | TFGMS84                               | 55.0                              | 150                            | 1                                                          | M                                                     | NSA                                                                                                            |
| PUIID16585058  | Ca2         | 36091161                | (CAA)4                       | 12                                | TCTTGGATTTTGATTCOCCTT            | ATACTGATACCAATGAGTCG             | 41-652            | 512-652                         | WRKY              | TFGMS85                               | 55.4                              | 146                            | 1                                                          | M                                                     | NSA                                                                                                            |
| PUIID16585059  | Ca8         | 164263                  | (AAATTC)3                    | 18                                | GGATCAACTGCTATTTTGTG             | ATTCCCGTACCTTTATCAGAG            | 0001-2757         | 847-1089                        | Helicase_c        | TFGMS86                               | 55.0                              | 176                            | 1                                                          | M                                                     | NSA                                                                                                            |
| PUIID16585060  | Ca7         | 4628092                 | (AG)8                        | 16                                | GAAGTCTTGGCACTGAGTTC             | TTAGGAACAGCCTTGTCAAT             | 0002-2005         | 1221-1371                       | Myb               | TFGMS87                               | 55.0                              | 153                            | 1                                                          | M                                                     | NSA                                                                                                            |
| PUIID16585061  | Ca8         | 1261403                 | (AG)6                        | 12                                | CTGAGAAATCTACCGCTCTG             | CGTGAGTTTGGTAATGAGTC             | 270-2291          | 1350-1550                       | RRM               | TFGMS88                               | 55.3                              | 147                            | 1                                                          | M                                                     | NSA                                                                                                            |
| PUIID16585062  | Ca8         | 1266265                 | (CAT)5                       | 15                                | AGAGAAGATACAGAGGAAGTCA           | ACCATTAGAGGGCTCAATTAG            | 270-2291          | 1350-1550                       | RRM               | TFGMS89                               | 54.9                              | 156                            | 1                                                          | M                                                     | NSA                                                                                                            |
| PUIID16585063  | Ca8         | 1261403                 | (TAAGAG)3                    | 18                                | CTGAGAAATCTACCGCTCTG             | CAACATACCTTACCAGTAGCC            | 270-2291          | 1350-1550                       | RRM               | TFGMS90                               | 55.3                              | 147                            | 1                                                          | M                                                     | NSA                                                                                                            |
| PUIID16585064  | Ca4         | 18225184                | (CATG)3                      | 12                                | AAAGTTTAGGAGATTTACTTGC           | TGTCATCGTCACATTAACA              | 36-812            | 81-230                          | SET               | TFGMS91                               | 53.3                              | 159                            | 1                                                          | M                                                     | NSA                                                                                                            |
| PUIID16585065  | Ca6         | 15843439                | (AAC)6                       | 18                                | TGGAAGAGAGAGTTGAAAGA             | CCATTTGGTAATTCTTCCCTC            | 152-3118          | 2654-2935                       | Junjc             | TFGMS92                               | 54.4                              | 157                            | 1                                                          | M                                                     | NSA                                                                                                            |
| PUIID16585066  | Ca7         | 13320709                | (ACC)5                       | 15                                | CCACAATTTGAAAACCAAAAT            | CCAACACTACAAAATCTTCC             | 1827-4139         | 3456-3575                       | HomeoBox          | TFGMS93                               | 55.1                              | 163                            | 1                                                          | M                                                     | NSA                                                                                                            |
| PUIID16585067  | Ca7         | 13313482                | (ATA)6                       | 18                                | GCAGAAGGATCAGATACAGAA            | GGGAATTTGAACATCTCTGAT            | 1827-4139         | 3456-3575                       | HomeoBox          | TFGMS94                               | 54.6                              | 152                            | 1                                                          | M                                                     | NSA                                                                                                            |
| PUIID16585068  | Ca7         | 13320216                | (CAC)4                       | 12                                | TCCTTCAACTCAAAATCTTCA            | GTTCTGTTTGAGGAACGAA              | 1827-4139         | 3456-3575                       | HomeoBox          | TFGMS95                               | 55.1                              | 151                            | 1                                                          | M                                                     | NSA                                                                                                            |
| PUIID16585069  | Ca7         | 13320579                | (CAGCAA)3                    | 18                                | AACCGGAATGTATCAGAGAT             | GAGAGTTGAAGGGAATTTGGT            | 1827-4139         | 3456-3575                       | HomeoBox          | TFGMS96                               | 55.3                              | 129                            | 1                                                          | M                                                     | NSA                                                                                                            |
| PUIID16585070  | Ca7         | 13319948                | (TCT)6                       | 18                                | GTTGGATTAGGAACGATTAAAC           | ATTGAAAGCTTCTTCAATTCC            | 1827-4139         | 3456-3575                       | HomeoBox          | TFGMS97                               | 55.3                              | 149                            | 1                                                          | M                                                     | NSA                                                                                                            |
| PUIID16585071  | Ca7         | 11287744                | (ATG)4                       | 12                                | CAAAATATGAAGAGAATTGGA            | GAAGAAGAAGCATTTGACTGA            | 0008-1972         | 947-1126                        | AP2               | TFGMS98                               | 50.3                              | 140                            | 1                                                          | M                                                     | NSA                                                                                                            |
| PUIID16585072  | 0           | 0                       | (GGT)5                       | 15                                | CAATTTCCCTTTTTATCTGGT            | TTGATTTCTTCCATTTTGAC             | 35-1024           | 251-409                         | zf-dof            | TFGMS99                               | 55.0                              | 156                            | 1                                                          | M                                                     | NSA                                                                                                            |
| PUIID16585073  | Ca7         | 2334613                 | (ACA)4                       | 12                                | CCAAGAAGCAAGTAATCAGA             | CTCCAATCCAATTTCCATAAT            | 227-1168          | 251-454                         | AP2               | TFGMS100                              | 54.9                              | 149                            | 1                                                          | M                                                     | NSA                                                                                                            |
| PUIID16585074  | Ca4         | 43493861                | (ATTGTA)3                    | 18                                | TGAACCTTGGTATTCTCTGA             | AACCCAATACAGAAGAGGAAC            | 573-1883          | 1401-1847                       | bHLH MYC          | TFGMS101                              | 55.0                              | 148                            | 1                                                          | M                                                     | NSA                                                                                                            |
| PUIID16585075  | Ca3         | 39780715                | (AAG)6                       | 18                                | ATGACAAATCTGAGTCTTTGG            | GGCTTCATGTAGTTGTAGGTG            | 254-2524          | 2321-2500                       | Myb               | TFGMS102                              | 54.3                              | 156                            | 1                                                          | M                                                     | NSA                                                                                                            |
| PUIID16585076  | Ca3         | 39780715                | (AGG)4                       | 12                                | ATGACAAATCTGAGTCTTTGG            | GGCTTCATGTAGTTGTAGGTG            | 254-2524          | 2321-2500                       | Myb               | TFGMS103                              | 54.3                              | 156                            | 1                                                          | M                                                     | NSA                                                                                                            |
| PUIID16585077  | Ca3         | 37388954                | (CAA)4                       | 12                                | AGAACCTCAATTTCCACCAT             | TGCATTTAGATATCCACACCA            | 176-1258          | 224-400                         | Myb               | TFGMS104                              | 55.3                              | 151                            | 1                                                          | M                                                     | NSA                                                                                                            |
| PUIID16585078  | Ca8         | 13448677                | (ACA)4                       | 12                                | ACTTTAGCAGAAATCCAGACC            | AGATAAAGGGGAATTGTTTG             | 145-2019          | 814-1929                        | GRAS              | TFGMS105                              | 55.2                              | 147                            | 1                                                          | M                                                     | NSA                                                                                                            |
| PUIID16585079  | Ca8         | 13448677                | (CAJ)5                       | 15                                | ACTTTAGCAGAAATCCAGACC            | AGATAAAGGGGAATTGTTTG             | 145-2019          | 814-1929                        | GRAS              | TFGMS106                              | 55.2                              | 147                            | 1                                                          | M                                                     | NSA                                                                                                            |
| PUIID16585080  | Ca3         | 39816016                | (AAGG)3                      | 12                                | TCGCTTTTGAAGGAAGGAAGT            | GATAGTTTGAGGAGGGAAGTG            | 479-1678          | 764-1003                        | B3                | TFGMS107                              | 55.5                              | 151                            | 1                                                          | M                                                     | NSA                                                                                                            |
| PUIID16585081  | Ca3         | 39817768                | (AAT)5                       | 15                                | CTCCCCGATCAATCTACTAT             | GCCAAATTCCTTCTCTTCTC             | 479-1678          | 764-1003                        | B3                | TFGMS108                              | 55.0                              | 140                            | 1                                                          | M                                                     | NSA                                                                                                            |
| PUIID16585082  | Ca3         | 39817940                | (CAA)4                       | 12                                | CATCATCGTCATCATCTTCA             | CCAACCTACAAACTGCGAAAC            | 479-1678          | 764-1003                        | B3                | TFGMS109                              | 55.3                              | 143                            | 1                                                          | M                                                     | NSA                                                                                                            |
| PUIID16585083  | Ca3         | 39818014                | (GCAJ)4                      | 16                                | GAAACTCAGTGCTGTTTGAT             | AACCGTTTTCCTCCTGTATT             | 479-1678          | 764-1003                        | B3                | TFGMS110                              | 54.6                              | 129                            | 1                                                          | M                                                     | NSA                                                                                                            |
| PUIID16585084  | 0           | 0                       | (TGAGAA)3                    | 18                                | TCAGAACAAGTTTCAATGGTT            | GTACTGTGCACACATCACAA             | 224-2434          | 230-1321                        | GRAS              | TFGMS111                              | 55.2                              | 166                            | 1                                                          | M                                                     | NSA                                                                                                            |
| PUIID16585085  | Ca6         | 41935803                | (TTG)5                       | 15                                | TTCACAAAAGACAAAAGGTGT            | GCAATCTTTTCCCATTTGACT            | 335-2389          | 686-988                         | B3                | TFGMS112                              | 54.9                              | 149                            | 1                                                          | M                                                     | NSA                                                                                                            |
| PUIID16585086  | Ca6         | 1609208                 | (TCTCT)3                     | 18                                | TACCTCCACATCTTTTCAAT             | CCATAAGGATGATGGAACATT            | 257-1750          | 1106-1735                       | DUF3633           | TFGMS113                              | 54.6                              | 134                            | 1                                                          | M                                                     | NSA                                                                                                            |
| PUIID16585087  | Ca3         | 24503146                | (CTC)5                       | 15                                | CTAACCCACACCCCTCTAAAT            | GGCGTAGAATAGTGAAGAAGG            | 464-1504          | 581-793                         | Myb               | TFGMS114                              | 55.0                              | 125                            | 1                                                          | M                                                     | NSA                                                                                                            |
| PUIID16585088  | Ca4         | 45517555                | (ATT)5                       | 15                                | GAGGAACCAATTTCTTCTTC             | TAAAGCAGATTCCCTTTTCTC            | 723-2003          | 1530-1613                       | HLH               | TFGMS115                              | 54.7                              | 167                            | 1                                                          | M                                                     | NSA                                                                                                            |
| PUIID16585089  | Ca4         | 45517015                | (CAT)4                       | 12                                | TCTGTGTCCAATTGGGTAA              | ATTCAATGTGAGAACCACTTG            | 723-2003          | 1530-1613                       | HLH               | TFGMS116                              | 55.1                              | 148                            | 1                                                          | M                                                     | NSA                                                                                                            |
| PUIID16585090  | Ca7         | 6498854                 | (AGA)4                       | 12                                | ACGAGATCATTTTCGATTCT             | CAGGAAACACAAAGACATAT             | 750-1364          | 761-868                         | BSD               | TFGMS117                              | 55.0                              | 138                            | 1                                                          | M                                                     | NSA                                                                                                            |
| PUIID16585091  | Ca7         | 6501203                 | (ATAAA)3                     | 15                                | ACAAGTTGCATTGAAGAAGAA            | CGTCAAGGATGACCTATCTCT            | 750-1364          | 761-868                         | BSD               | TFGMS118                              | 55.2                              | 148                            | 1                                                          | M                                                     | NSA                                                                                                            |
| PUIID16585092  | Ca2         | 33605379                | (CCAA)4                      | 12                                | ACTCCTGAAATGGGTATGTTT            | CTCCACCACACTGTGACCTG             | 218-1237          | 569-1039                        | DUF702            | TFGMS119                              | 55.2                              | 140                            | 1                                                          | M                                                     | NSA                                                                                                            |
| PUIID16585093  | Ca2         | 33604031                | (TGG)6                       | 18                                | TTTCTGAGCTTCATTAGGTG             | GTGGATTAAATCGTTGGACT             | 218-1237          | 569-1039                        | DUF702            | TFGMS120                              | 54.9                              | 150                            | 1                                                          | M                                                     | NSA                                                                                                            |
| PUIID16585094  | 0           | 0                       | (AAG)5                       | 15                                | CATCCAAGACAAGTTCCTTA             | CTCTGGAATTTAAACAAGCA             | 101-685           | 140-499                         | BTB               | TFGMS121                              | 54.6                              | 156                            | 1                                                          | M                                                     | NSA                                                                                                            |

| NCBI Probe IDs | Chromosomes | Physical positions (bp) | Microsatellite repeat-motifs | Microsatellite repeat length (bp) | Forward Primer sequences (5'-3') | Reverse Primer sequences (5'-3') | ORF position (bp) | Functional domain position (bp) | Functional domain | Types of genic microsatellite markers | Actual annealing temperature (°C) | Size (bp) of alleles amplified | Total number of alleles amplified among chickpea varieties | Polymorphic potential monomorphic (M)/polymorphic (P) | R2 value of marker loci showing significant association (P ≤ 0.05) with three major seed and pod traits |
|----------------|-------------|-------------------------|------------------------------|-----------------------------------|----------------------------------|----------------------------------|-------------------|---------------------------------|-------------------|---------------------------------------|-----------------------------------|--------------------------------|------------------------------------------------------------|-------------------------------------------------------|---------------------------------------------------------------------------------------------------------|
| PUID16585095   | Ca6         | 26353426                | (GAA)6                       | 18                                | TGAAGGGTAGAAGAATCACA             | TTCCACATTAAAGCAACACTTT           | 1070-2365         | 1229-2353                       | GRAS              | TFGMS122                              | 55.0                              | 150                            | 1                                                          | M                                                     | NSA                                                                                                     |
| PUID16585096   | Ca5         | 223412                  | (ACTGC)3                     | 18                                | TTGACTCATCTACCTCTCCAA            | GGAGAAGAGGGTAGCCATAGAA           | 265-1221          | 793-948                         | ZF HD dimer       | TFGMS123                              | 54.9                              | 144                            | 1                                                          | M                                                     | NSA                                                                                                     |
| PUID16585097   | Ca5         | 223807                  | (GCA)5                       | 15                                | CACATGTGGAGGTACAACCTCT           | GGCTAAACTAGATGGCTGATA            | 265-1221          | 793-948                         | ZF HD dimer       | TFGMS124                              | 55.1                              | 169                            | 1                                                          | M                                                     | NSA                                                                                                     |
| PUID16585098   | Ca5         | 223807                  | (GTTGAA)3                    | 18                                | CACATGTGGAGGTACAACCTCT           | TAACTACCAGCATCACCACCTC           | 265-1221          | 793-948                         | ZF HD dimer       | TFGMS125                              | 55.1                              | 169                            | 1                                                          | M                                                     | NSA                                                                                                     |
| PUID16585099   | Ca8         | 14720356                | (AAC)4                       | 12                                | AAAACCCATTGCAACAAAATC            | GCGGTTAATTCAGTGAAGAAT            | 97-2433           | 379-627                         | SWIRM             | TFGMS126                              | 55.0                              | 169                            | 1                                                          | M                                                     | NSA                                                                                                     |
| PUID16585100   | Ca7         | 3789471                 | (CAA)5                       | 15                                | TATGATGGAACAGAGAAGTG             | CAGTGTTGTTTGTCTCGATT             | 662-2104          | 1610-1849                       | Helicase          | TFGMS127                              | 55.2                              | 150                            | 1                                                          | M                                                     | NSA                                                                                                     |
| PUID16585101   | Ca7         | 3789567                 | (CATTCT)3                    | 18                                | TCCTTCTTCTCTCAACAACA             | TTGCAAGATGAGAATGAGAAT            | 662-2104          | 1610-1849                       | Helicase          | TFGMS128                              | 55.1                              | 139                            | 1                                                          | M                                                     | NSA                                                                                                     |
| PUID16585102   | Ca7         | 1376023                 | (AATT)3                      | 12                                | AAGCCTTGCTGAATTAATCTT            | TTTCACTAAAGCTTAACGAGA            | 240-1769          | 1353-1523                       | WRKY              | TFGMS129                              | 55.1                              | 150                            | 1                                                          | M                                                     | NSA                                                                                                     |
| PUID16585103   | Ca4         | 48385988                | (GTTGGA)3                    | 18                                | ATTTGTGTTTGGTTGTGATG             | AGGCAAAAGACACAAGAGGT             | 131-2884          | 572-880                         | B3                | TFGMS130                              | 55.9                              | 171                            | 1                                                          | M                                                     | NSA                                                                                                     |
| PUID16585104   | Ca4         | 7548920                 | (CAC)5                       | 15                                | CTCAGATTTGCAATTTTCTCA            | GCTTCTTGCTCTGTTGTTTC             | 234-1424          | 756-1202                        | NAD binding       | TFGMS131                              | 54.8                              | 144                            | 1                                                          | M                                                     | NSA                                                                                                     |
| PUID16585105   | Ca6         | 41647287                | (CAC)4                       | 12                                | ACATTGAAAGCTCAGCGATAA            | CTCTTTTCTTGCGTTATACCA            | 233-487           | 351-475                         | PRK10365          | TFGMS132                              | 55.2                              | 177                            | 1                                                          | M                                                     | NSA                                                                                                     |
| PUID16585106   | Ca6         | 22249682                | (AAC)4                       | 12                                | TATGTGTGCAGACAGTGGTAA            | CCACTGTCTGCACACATGATA            | 171-1790          | 669-1787                        | GRAS              | TFGMS133                              | 55.2                              | 143                            | 1                                                          | M                                                     | NSA                                                                                                     |
| PUID16585107   | Ca1         | 19030570                | (TCACAC)3                    | 18                                | ACATTACATTACATTCACA              | TTCTGGAGGAGATAGTAGTGGT           | 171-1790          | 669-1787                        | GRAS              | TFGMS134                              | 54.7                              | 165                            | 1                                                          | M                                                     | NSA                                                                                                     |
| PUID16585108   | Ca1         | 34866800                | (CCA)4                       | 12                                | CATACTAGCACTACTTCCACCA           | GGAGTGTGACAGCAAGAAGAAA           | 242-2413          | 1112-1369                       | Bromodomain       | TFGMS135                              | 54.7                              | 144                            | 1                                                          | M                                                     | NSA                                                                                                     |
| PUID16585109   | Ca1         | 48128422                | (AGA)4                       | 12                                | TCOCTTAACCTTCATTCACT             | TTTCAGTATCAACCGAAGAA             | 432-1337          | 483-674                         | TCP               | TFGMS136                              | 55.3                              | 146                            | 1                                                          | M                                                     | NSA                                                                                                     |
| PUID16585110   | Ca1         | 48128515                | (AGA)5                       | 15                                | TTATCTGGCGCAACTGTGATT            | TCGTGTTTGGTTTCGTGTAT             | 432-1337          | 483-674                         | TCP               | TFGMS137                              | 54.9                              | 153                            | 1                                                          | M                                                     | NSA                                                                                                     |
| PUID16585111   | Ca1         | 48129062                | (CAA)4                       | 12                                | GTGGAAACCTCATCTCCTCAC            | GTCCOCTCTGTGAAGATACT             | 432-1337          | 483-674                         | TCP               | TFGMS138                              | 55.4                              | 131                            | 1                                                          | M                                                     | NSA                                                                                                     |
| PUID16585112   | Ca1         | 48129334                | (TAA)6                       | 18                                | CCGGTGCTACTATTGATACTG            | CCAAAGTGGAAAAAGAAAGT             | 432-1337          | 483-674                         | TCP               | TFGMS139                              | 55.1                              | 162                            | 1                                                          | M                                                     | NSA                                                                                                     |
| PUID16585113   | Ca5         | 37947047                | (CT)8                        | 16                                | GTACACAAACAAATCCACAGT            | AAGCAACGACAGATACAAAA             | 753-1369          | 752-836                         | SBP               | TFGMS140                              | 55.0                              | 144                            | 1                                                          | M                                                     | NSA                                                                                                     |
| PUID16585114   | Ca5         | 31241189                | (AATTCC)3                    | 18                                | AAACAACAACATCACAAAACC            | TTTGAGAGATCGTTTGTGAAG            | 53-2030           | 479-718                         | Bromodomain       | TFGMS141                              | 55.1                              | 157                            | 1                                                          | M                                                     | NSA                                                                                                     |
| PUID16585115   | Ca5         | 31243405                | (GAC)5                       | 15                                | ACGTGTTCTTGGTAGTGTCTA            | ATGTGGAGTTGTATGGAGAA             | 53-2030           | 479-718                         | Bromodomain       | TFGMS142                              | 55.1                              | 159                            | 1                                                          | M                                                     | NSA                                                                                                     |
| PUID16585116   | Ca1         | 389138                  | (CTCAAA)3                    | 18                                | GTATGTTGGCTGCTCTTAATG            | TTCACTTCACCCATATGATC             | 41-1297           | 380-691                         | TCP               | TFGMS143                              | 55.2                              | 151                            | 1                                                          | M                                                     | NSA                                                                                                     |
| PUID16585117   | Ca1         | 389097                  | (TCTCAT)4                    | 24                                | GGTGCTACTGATTCAATGTT             | GAGGAGGAGGATAATTGGTTA            | 41-1297           | 380-691                         | TCP               | TFGMS144                              | 54.4                              | 156                            | 1                                                          | M                                                     | NSA                                                                                                     |
| PUID16585118   | Ca6         | 29235252                | (ATT)6                       | 18                                | TCCATCAAAACAGAGAAAGA             | TAATTCGCGACTATCAATG              | 735-1496          | 975-1109                        | HLH               | TFGMS145                              | 55.1                              | 158                            | 1                                                          | M                                                     | NSA                                                                                                     |
| PUID16585119   | 0           | 0                       | (AGAA)4                      | 16                                | AAAGGAAAAATTAGGCAGAGA            | AAGTGTCOCTTAGCGAAATAC            | 253-2394          | 694-999                         | B3                | TFGMS146                              | 55.1                              | 145                            | 1                                                          | M                                                     | NSA                                                                                                     |
| PUID16585120   | Ca6         | 17370871                | (TGGTTC)3                    | 18                                | CTCAACACCCAGCATAGGTAG            | ACTAGTGCAATTTCAGAGAGC            | 253-2394          | 694-999                         | B3                | TFGMS147                              | 55.1                              | 144                            | 1                                                          | M                                                     | NSA                                                                                                     |
| PUID16585121   | Ca6         | 17371099                | (TCT)6                       | 18                                | GAGTATTGGCTGAGTTCCTTT            | GAGAATCTTGGTGTGTTTGA             | 253-2394          | 694-999                         | B3                | TFGMS148                              | 54.9                              | 154                            | 1                                                          | M                                                     | NSA                                                                                                     |
| PUID16585122   | Ca4         | 438817                  | (ATA)4                       | 12                                | GAGTGTGGGGAACCTAATCT             | ATCACACAACAGGACATCACT            | 389-3034          | 2006-2125                       | PHD               | TFGMS149                              | 55.0                              | 161                            | 1                                                          | M                                                     | NSA                                                                                                     |
| PUID16585123   | Ca4         | 4747167                 | (TTA)5                       | 15                                | GTGACACAGAATTAGGAAGA             | TCATTGTTTATACGGCTCTC             | 599-1735          | 1079-1233                       | Myb DNA binding   | TFGMS150                              | 54.5                              | 155                            | 1                                                          | M                                                     | NSA                                                                                                     |
| PUID16585124   | Ca5         | 33238585                | (AAG)6                       | 18                                | GAGGGATTCCAGATGCCAAG             | AGCACCAAGCATCCAGAAAG             | 82-804            | 285-438                         | LOH               | TFGMS151                              | 59.9                              | 129                            | 1                                                          | M                                                     | NSA                                                                                                     |
| PUID16585125   | Ca1         | 12008935                | (GTTCAA)3                    | 18                                | CATTCTTCTTCCAGTCTTTCC            | GTTCCCATATTGTGTTCTCA             | 109-1142          | 907-1047                        | PHD               | TFGMS152                              | 55.6                              | 152                            | 1                                                          | M                                                     | NSA                                                                                                     |
| PUID16585126   | Ca3         | 20827838                | (AGAA)3                      | 12                                | TATTCCGTAGCCTCCATAACA            | GGAAACCCTAGGTATTGTTGT            | 3270-4370         | 3447-4355                       | WD40              | TFGMS153                              | 55.1                              | 150                            | 1                                                          | M                                                     | NSA                                                                                                     |
| PUID16585127   | Ca3         | 20843747                | (CAT)6                       | 18                                | CGTTTCCATTAGAGGAGAGAC            | ATGAAGTGTAGGTGATGAACG            | 3270-4370         | 3447-4355                       | WD40              | TFGMS154                              | 55.6                              | 162                            | 1                                                          | M                                                     | NSA                                                                                                     |
| PUID16585128   | Ca1         | 27450034                | (AG)6                        | 12                                | TCTACAGACACAAGAGGGGTA            | TCOCTCGTATTGTGTGTTGT             | 589-1512          | 895-1320                        | DUF702            | TFGMS155                              | 54.9                              | 150                            | 1                                                          | M                                                     | NSA                                                                                                     |
| PUID16585129   | Ca8         | 5412028                 | (TAG)5                       | 15                                | GGGTTAAATTTGATTGGTTGT            | CACCTATCTGTGCGCACTTTT            | 589-1512          | 895-1320                        | DUF702            | TFGMS156                              | 55.6                              | 150                            | 1                                                          | M                                                     | NSA                                                                                                     |
| PUID16585130   | Ca6         | 23548564                | (AGCAAC)3                    | 18                                | GTGAGTAGCAGAGAAATGG              | AAATAGCGAAGAACGTAAAC             | 37-888            | 262-495                         | Swi3              | TFGMS157                              | 55.0                              | 144                            | 1                                                          | M                                                     | NSA                                                                                                     |
| PUID16585131   | Ca6         | 23548687                | (TCC)5                       | 15                                | CAACCCCTAACACTAACACCA            | TGGTGTTAGTGTATAGGGTTTG           | 37-888            | 262-495                         | Swi3              | TFGMS158                              | 55.3                              | 167                            | 1                                                          | M                                                     | NSA                                                                                                     |
| PUID16585132   | Ca1         | 37691883                | (CGC)5                       | 15                                | CCATGTTTGTGTTAGGTGAT             | GCATTGTTCTTGAATCTCTC             | 19-1119           | 856-1010                        | Myb DNA binding   | TFGMS159                              | 55.0                              | 150                            | 1                                                          | M                                                     | NSA                                                                                                     |
| PUID16585133   | Ca7         | 1991783                 | (CCT)4                       | 12                                | GGAATCGCAATTGATACATAG            | ATTTTCTTAGTGGGAAGATGG            | 492-1448          | 1107-1448                       | Zi-B Box          | TFGMS160                              | 54.9                              | 168                            | 1                                                          | M                                                     | NSA                                                                                                     |
| PUID16585134   | Ca7         | 31541402                | (AGA)4                       | 12                                | AGTTACAATTGAATGGATGG             | AAAAGGTATTGGACAAGAGTG            | 1553-2188         | 1563-2095                       | Ras               | TFGMS161                              | 54.9                              | 138                            | 1                                                          | M                                                     | NSA                                                                                                     |
| PUID16585135   | Ca7         | 31541951                | (CAA)4                       | 12                                | GAAATGGGTTTATGGCTTAT             | CACCTTCAAAATCACTCAGTC            | 1553-2188         | 1563-2095                       | Ras               | TFGMS162                              | 55.0                              | 142                            | 1                                                          | M                                                     | NSA                                                                                                     |
| PUID16585136   | Ca4         | 36800034                | (ATCGG)3                     | 15                                | GCCGATCTTAAAGTAGAATGG            | ACAAACAAATAGACCTCCACA            | 602-1432          | 1016-1186                       | RPM               | TFGMS163                              | 55.7                              | 152                            | 1                                                          | M                                                     | NSA                                                                                                     |
| PUID16585137   | Ca4         | 36799262                | (CCCT)3                      | 12                                | CAAGAAAACATCACAGTCTCT            | AGTCGGAGCAGGAGTAATAGT            | 602-1432          | 1016-1186                       | RPM               | TFGMS164                              | 54.8                              | 145                            | 1                                                          | M                                                     | NSA                                                                                                     |
| PUID16585138   | Ca4         | 36799376                | (CCCTAT)3                    | 18                                | CCCTATCCCTACTATCCCTAA            | AGGGATAGGGTTTAGGGATAGT           | 602-1432          | 1016-1186                       | RPM               | TFGMS165                              | 54.2                              | 148                            | 1                                                          | M                                                     | NSA                                                                                                     |
| PUID16585139   | Ca4         | 5081434                 | (TAA)6                       | 18                                | GTAGTGACGATAAATGCCAAG            | CAAGTTTCAGTAACAACCCGATA          | 135-1787          | 1365-1622                       | Myb DNA binding   | TFGMS166                              | 55.2                              | 141                            | 1                                                          | M                                                     | NSA                                                                                                     |
| PUID16585140   | Ca4         | 10419364                | (AGC)4                       | 12                                | TCTATCTGGCTAACTGTTTTT            | CAGGATTGAGTTTGGTACTG             | 255-5342          | 2187-2315                       | Myb DNA binding   | TFGMS167                              | 55.0                              | 152                            | 1                                                          | M                                                     | NSA                                                                                                     |
| PUID16585141   | Ca5         | 47733924                | (ATT)3                       | 12                                | ATGTTGATGTACCCAAACAG             | TGGTCAACATTGAATAGTTAGG           | 61-930            | 79-456                          | NAM               | TFGMS168                              | 55.0                              | 165                            | 1                                                          | M                                                     | NSA                                                                                                     |
| PUID16585142   | Ca7         | 12333197                | (TCT)5                       | 15                                | ATCACTGCAACCCGTTTCTC             | GCATGTGAAAGTGAAGCTAC             | 315-2303          | 405-635                         | FHA               | TFGMS169                              | 55.0                              | 150                            | 1                                                          | M                                                     | NSA                                                                                                     |
| PUID16585143   | Ca3         | 21774741                | (CAA)4                       | 12                                | TGATACCAATTGTCCAAAGTT            | CTAATCAGCAGCAGTAGTGTT            | 110-1948          | 854-1906                        | GRAS              | TFGMS170                              | 54.7                              | 155                            | 1                                                          | M                                                     | NSA                                                                                                     |
| PUID16585144   | Ca5         | 42984444                | (AACAGA)3                    | 18                                | TTTTTGAACTCAACAGAAGC             | ATCATCAACACGAACACTCG             | 81-1853           | 681-833                         | Myb DNA binding   | TFGMS171                              | 54.9                              | 142                            | 1                                                          | M                                                     | NSA                                                                                                     |
| PUID16585145   | Ca1         | 9653309                 | (ATG)4                       | 12                                | ATGCTAATCTCAAAGCTCCTT            | TTCATGGCATTACTTCTCTGT            | 127-1245          | 661-915                         | Myb DNA binding   | TFGMS172                              | 55.7                              | 154                            | 1                                                          | M                                                     | NSA                                                                                                     |
| PUID16585146   | 0           | 0                       | (CAAG)3                      | 12                                | CTAAATCTTAACCAACACACGA           | TAATGGTTAAGGTTGTTGGA             | 54-1457           | 855-1348                        | UDPGT             | TFGMS173                              | 54.7                              | 155                            | 1                                                          | M                                                     | NSA                                                                                                     |
| PUID16585147   | Ca2         | 11922227                | (ACA)4                       | 12                                | GAAATGCCAAATAGGTTTCAT            | TATCACAAAATGCGGAAGC              | 52-1329           | 874-1144                        | TCP               | TFGMS174                              | 55.0                              | 163                            | 1                                                          | M                                                     | NSA                                                                                                     |
| PUID16585148   | Ca7         | 30759842                | (TCTT)4                      | 16                                | ACACAAAAATCACACACCTC             | AATGCTTATTACCACTCTTGC            | 511-3027          | 988-1620                        | START             | TFGMS175                              | 55.0                              | 150                            | 1                                                          | M                                                     | NSA                                                                                                     |
| PUID16585149   | Ca7         | 30760228                | (TGG)5                       | 15                                | CAAAATGCGTAGTGAGTCTTC            | AAGGAAAGTGATGGAAATAAGA           | 511-3027          | 988-1620                        | START             | TFGMS176                              | 55.2                              | 149                            | 1                                                          | M                                                     | NSA                                                                                                     |
| PUID16585150   | 0           | 0                       | (AG)7                        | 14                                | GACGAGTTTGTGTTGAAGAG             | CTCGATGAGAAGCAGAGATTA            | 214-1212          | 853-1128                        | HSF DNA bind      | TFGMS177                              | 55.1                              | 143                            | 1                                                          | M                                                     | NSA                                                                                                     |
| PUID16585151   | 0           | 0                       | (AGAA)4                      | 16                                | GACGAGTTTGTGTTGAAGAG             | CGTAACTAACGCGAGTACCCTC           | 214-1212          | 853-1128                        | HSF DNA bind      | TFGMS178                              | 55.1                              | 143                            | 1                                                          | M                                                     | NSA                                                                                                     |
| PUID16585152   | Ca7         | 20234897                | (ATT)6                       | 12                                | CTGGAACCATTTGATACCTTGC           | CTCTTCAACTGAACCTTACCT            | 258-980           | 490-761                         | K-Box             | TFGMS179                              | 55.5                              | 151                            | 1                                                          | M                                                     | NSA                                                                                                     |
| PUID16585153   | Ca6         | 55332793                | (ACA)6                       | 18                                | TTCTCTAGTTTCGGAGAATCC            | GGTTTGTGCTGTGATAGAAA             | 522-1952          | 1269-1388                       | HomeoBox          | TFGMS180                              | 55.3                              | 156                            | 1                                                          | M                                                     | NSA                                                                                                     |
| PUID16585154   | Ca4         | 39805445                | (TA)8                        | 16                                | GGCCTCAGCTGTTGACATTAC            | TAAATAAGAGGGTGCAATTGA            | 308-3313          | 575-715                         | Myb DNA binding   | TFGMS181                              | 54.4                              | 149                            | 1                                                          | M                                                     | NSA                                                                                                     |
| PUID16585155   | Ca4         | 41865183                | (CAA)4                       | 12                                | AATTAAGGCTAGGGAACAACA            | GAGATGAGGCCATTCCTCAT             | 287-3016          | 2270-2383                       | WD40              | TFGMS182                              | 55.7                              | 143                            | 1                                                          | M                                                     | NSA                                                                                                     |
| PUID16585156   | Ca4         | 41865067                | (CAG)5                       | 15                                | TGCAACAGATGTGTTACAGA             | CATGCGCTCTGTAACAACATCT           | 287-3016          | 2270-2383                       | WD40              | TFGMS183                              | 55.3                              | 170                            | 1                                                          | M                                                     | NSA                                                                                                     |

| NCBI Probe IDs | Chromosomes | Physical positions (bp) | Microsatellite repeat-motifs | Microsatellite repeat length (bp) | Forward Primer sequences (5'-3') | Reverse Primer sequences (5'-3') | ORF position (bp) | Functional domain position (bp) | Functional domain | Types of genic microsatellite markers | Actual annealing temperature (°C) | Size (bp) of alleles amplified | Total number of alleles amplified among chickpea varieties | Polymorphic potential monomorphic (M)/polymorphic (P) | R2 value of marker loci showing significant association (P ≤ 0.05) with three major seed and pod traits |     |
|----------------|-------------|-------------------------|------------------------------|-----------------------------------|----------------------------------|----------------------------------|-------------------|---------------------------------|-------------------|---------------------------------------|-----------------------------------|--------------------------------|------------------------------------------------------------|-------------------------------------------------------|---------------------------------------------------------------------------------------------------------|-----|
| PUIID16585157  | 0           | 0                       | (TTG)5                       | 15                                | CACCACTGCTATTCAATGTTT            | ATCCAATGTGACATCACTGAC            | 307-1299          | 925-1056                        | WRC               |                                       | TFGMS184                          | 55.3                           | 149                                                        | 1                                                     | M                                                                                                       | NSA |
| PUIID16585158  | Ca7         | 5634290                 | (TTAGGG)3                    | 18                                | ATACAATCTCTCCCAAGGAT             | CTATCGTGTCCCAATCTCAAA            | 345-1304          | 909-1172                        | Myb DNA binding   |                                       | TFGMS185                          | 54.4                           | 156                                                        | 1                                                     | M                                                                                                       | NSA |
| PUIID16585159  | Ca3         | 38759947                | (TCAACT)3                    | 18                                | ATCTAACTCAAAGCCTGGTTC            | CATAGCGATCCTCTGAATTAT            | 102-1280          | 473-1259                        | bZIP              |                                       | TFGMS186                          | 55.2                           | 134                                                        | 1                                                     | M                                                                                                       | NSA |
| PUIID16585160  | Ca1         | 12405204                | (ATT)4                       | 12                                | TGTCGCAATTCCTAAACAC              | TTAATGATGTTATTGGCAACC            | 153-1067          | 801-965                         | Zf-Dof            |                                       | TFGMS187                          | 55.1                           | 147                                                        | 1                                                     | M                                                                                                       | NSA |
| PUIID16585161  | Ca1         | 48250303                | (TCA)5                       | 15                                | TCATAACGAGGTTTGTGATTC            | GAACATTGTGCAGAAAACATGG           | 316-1193          | 925-1059                        | bZIP              |                                       | TFGMS188                          | 54.5                           | 157                                                        | 1                                                     | M                                                                                                       | NSA |
| PUIID16585162  | Ca1         | 48249785                | (TGG)6                       | 18                                | AGTGACTCTATTGCCCTCCTC            | CAACCGCAATCTTACTTAAA             | 316-1193          | 925-1059                        | bZIP              |                                       | TFGMS189                          | 55.2                           | 136                                                        | 1                                                     | M                                                                                                       | NSA |
| PUIID16585163  | Ca2         | 10253706                | (CCG)4                       | 12                                | ACTTTGTTAAACTCGCACAC             | AAATTGCTCTCCTTCCATTAT            | 163-1092          | 448-582                         | Myb DNA binding   |                                       | TFGMS190                          | 54.7                           | 161                                                        | 1                                                     | M                                                                                                       | NSA |
| PUIID16585164  | 0           | 0                       | (CT)9                        | 18                                | CGTCACATTTTCTGAGCTAGT            | GAGAGAGAGTAGGGTTTGGGA            | 394-2775          | 1675-1797                       | PHD               |                                       | TFGMS191                          | 54.8                           | 150                                                        | 1                                                     | M                                                                                                       | NSA |
| PUIID16585165  | 0           | 0                       | (GCA)5                       | 15                                | TCATAATTCCGAAAACGATAG            | ATTTTCTTCGGTTTTTGAGTCT           | 394-2775          | 1675-1797                       | PHD               |                                       | TFGMS192                          | 54.6                           | 154                                                        | 1                                                     | M                                                                                                       | NSA |
| PUIID16585166  | Ca5         | 34512420                | (CAG)4                       | 12                                | GGTTTCTCGGACATTTTITAT            | TGGAACCTCGAGATTGCTGAT            | 180-2873          | 2505-2609                       | WD40              |                                       | TFGMS193                          | 54.9                           | 149                                                        | 1                                                     | M                                                                                                       | NSA |
| PUIID16585167  | 0           | 0                       | (TC)8                        | 16                                | CTTCACCCCTTGATTTT                | GTTGTTGTTGATGCTGTGAC             | 180-2873          | 2505-2609                       | WD40              |                                       | TFGMS194                          | 54.9                           | 130                                                        | 1                                                     | M                                                                                                       | NSA |
| PUIID16585168  | Ca1         | 1829150                 | (ATTG)3                      | 12                                | ACAAAGCAAAAGCTGACAAT             | GGCTCCAAAGGTATCTAAGAA            | 10-717            | 244-528                         | Jmjc              |                                       | TFGMS195                          | 55.2                           | 148                                                        | 1                                                     | M                                                                                                       | NSA |
| PUIID16585169  | Ca6         | 28198199                | (CAG)4                       | 12                                | GATAAATCAAGGCTCCTTCC             | AATAAGCAACAAGAGAAGTGC            | 37-1221           | 127-342                         | AUX_IAA           |                                       | TFGMS196                          | 55.1                           | 149                                                        | 1                                                     | M                                                                                                       | NSA |
| PUIID16585170  | Ca2         | 30865898                | (CAA)4                       | 12                                | ATCGAGTCTTCTCGATCTCT             | CTACCATCTGCTCTTGCTCTA            | 240-2327          | 432-623                         | ANK               |                                       | TFGMS197                          | 54.8                           | 149                                                        | 1                                                     | M                                                                                                       | NSA |
| PUIID16585171  | Ca2         | 30867621                | (CAA)5                       | 15                                | GCTTGAAGAGTGCTTTGAGT             | GGAAAGATGGAGGAAGAGATT            | 240-2327          | 432-623                         | ANK               |                                       | TFGMS198                          | 54.9                           | 147                                                        | 1                                                     | M                                                                                                       | NSA |
| PUIID16585172  | Ca3         | 20509103                | (AATA)3                      | 12                                | AATACTCTATGTTTCAACACA            | TTTGAATTTAGGACCATCAAG            | 89-1681           | 1172-1348                       | WRKY              |                                       | TFGMS199                          | 53.3                           | 163                                                        | 1                                                     | M                                                                                                       | NSA |
| PUIID16585173  | Ca3         | 20509059                | (ATA)6                       | 18                                | CATTCAATTTCCAACAACAAC            | TTTGAATTTAGGACCATCAAG            | 89-1681           | 1172-1348                       | WRKY              |                                       | TFGMS200                          | 55.6                           | 148                                                        | 1                                                     | M                                                                                                       | NSA |
| PUIID16585174  | Ca3         | 20509059                | (ATC)4                       | 12                                | CATTCAATTTCCAACAACAAC            | ATTGGTGATAATGAAGGAGGT            | 89-1681           | 1172-1348                       | WRKY              |                                       | TFGMS201                          | 55.6                           | 148                                                        | 1                                                     | M                                                                                                       | NSA |
| PUIID16585175  | Ca3         | 20509103                | (CAA)5                       | 15                                | AATACTCTATGTTTCAACACA            | ATTGGTGATAATGAAGGAGGT            | 89-1681           | 1172-1348                       | WRKY              |                                       | TFGMS202                          | 53.3                           | 163                                                        | 1                                                     | M                                                                                                       | NSA |
| PUIID16585176  | Ca2         | 30959905                | (ATT)5                       | 15                                | GGTCTTTCAATTATACACTTTC           | ATGCCACAGAGAAAAGAAAT             | 211-588           | 276-408                         | Myb DNA binding   |                                       | TFGMS203                          | 54.1                           | 162                                                        | 1                                                     | M                                                                                                       | NSA |
| PUIID16585177  | Ca6         | 53166542                | (AG)8                        | 16                                | TGCGAGAAAAGAGTGAGAAAG            | TGCTAACATCTTCAGTTCCCTC           | 2247-3533         | 2595-3512                       | TUB               |                                       | TFGMS204                          | 55.1                           | 152                                                        | 1                                                     | M                                                                                                       | NSA |
| PUIID16585178  | Ca4         | 6943933                 | (TCT)5                       | 15                                | TCGTGAATTAATGCTCTCCTTA           | CAAAATAGAAACTGCGAGAAA            | 203-1390          | 353-1111                        | PP2C              |                                       | TFGMS205                          | 55.3                           | 149                                                        | 1                                                     | M                                                                                                       | NSA |
| PUIID16585179  | Ca4         | 6944061                 | (TTTTTA)3                    | 18                                | TCTAAGCAAAACTGGTTGAAA            | TTTCAACCAGTTTTCGTTAGA            | 203-1390          | 353-1111                        | PP2C              |                                       | TFGMS206                          | 55.2                           | 158                                                        | 1                                                     | M                                                                                                       | NSA |
| PUIID16585180  | Ca7         | 19989726                | (TGG)6                       | 18                                | GGTGTGCTTATGAGAGAAAGT            | CTACCGCTACCAAGTACTACCA           | 322-1467          | 1102-1179                       | ZfCCCH            |                                       | TFGMS207                          | 54.9                           | 152                                                        | 1                                                     | M                                                                                                       | NSA |
| PUIID16585181  | Ca1         | 10712913                | (CAG)5                       | 15                                | TCCAAATTCATCCTCAGAAG             | CTCTCAATTTCAAATCACTCTG           | 165-1457          | 875-995                         | bZIP              |                                       | TFGMS208                          | 55.3                           | 162                                                        | 1                                                     | M                                                                                                       | NSA |
| PUIID16585182  | Ca1         | 10712913                | (GCA)4                       | 12                                | TCCAAATTCATCCTCAGAAG             | CTCTCAATTTCAAATCACTCTG           | 165-1457          | 875-995                         | bZIP              |                                       | TFGMS209                          | 55.3                           | 162                                                        | 1                                                     | M                                                                                                       | NSA |
| PUIID16585183  | Ca7         | 6058057                 | (TCT)5                       | 15                                | ATTGCCTTAATGTTCCCGTTT            | AGAATGGCTTATGAGGAGAAT            | 586-1209          | 937-1101                        | KNOXZ             |                                       | TFGMS210                          | 56.0                           | 151                                                        | 1                                                     | M                                                                                                       | NSA |
| PUIID16585184  | Ca7         | 8420511                 | (CAG)4                       | 12                                | CTGTGTCGTGATCACTAATTC            | AAAGAAGCAATATCCAGAGG             | 1445-2314         | 1877-2212                       | Response          |                                       | TFGMS211                          | 55.0                           | 150                                                        | 1                                                     | M                                                                                                       | NSA |
| PUIID16585185  | Ca7         | 8419147                 | (TCA)5                       | 15                                | GTCAATGTTTCTTCTCCTCCTC           | TATGTCAATCGGAACAACATT            | 1445-2314         | 1877-2212                       | Response          |                                       | TFGMS212                          | 55.4                           | 150                                                        | 1                                                     | M                                                                                                       | NSA |
| PUIID16585186  | Ca8         | 4460537                 | (ACA)4                       | 12                                | GTTAGAGTCGGATTTGGAAAT            | CTCATACCCCAACTTGTTTTGA           | 120-1178          | 588-797                         | SWIB              |                                       | TFGMS213                          | 55.0                           | 151                                                        | 1                                                     | M                                                                                                       | NSA |
| PUIID16585187  | Ca8         | 4460461                 | (AGA)6                       | 18                                | AGCGTACACAACAACAAGAT             | CGCATCTCTTCTACTTGTGTC            | 120-1178          | 588-797                         | SWIB              |                                       | TFGMS214                          | 55.0                           | 167                                                        | 1                                                     | M                                                                                                       | NSA |
| PUIID16585188  | Ca8         | 4460304                 | (GAA)6                       | 18                                | ATGAAGAGGAAGAGGAGAAAA            | TCCTCTTCATTACCATCTTCA            | 120-1178          | 588-797                         | SWIB              |                                       | TFGMS215                          | 54.8                           | 154                                                        | 1                                                     | M                                                                                                       | NSA |
| PUIID16585189  | Ca3         | 9692224                 | (ATT)5                       | 15                                | GAATCAATTTCTTCACCGTTA            | TGCTGTATGGTGTTTATCC              | 286-3552          | 430-750                         | SET               |                                       | TFGMS216                          | 54.5                           | 149                                                        | 1                                                     | M                                                                                                       | NSA |
| PUIID16585190  | Ca3         | 9692046                 | (GGTTTA)3                    | 18                                | AATTTTCTCCTCTTCAACAC             | CCTCTCGATCATCTCTACTCC            | 286-3552          | 430-750                         | SET               |                                       | TFGMS217                          | 55.0                           | 150                                                        | 1                                                     | M                                                                                                       | NSA |
| PUIID16585191  | Ca5         | 43950855                | (TAAT)4                      | 16                                | CAGAGATAGTCGATGACGAG             | TTTGTTCACGGAGAAAGTATC            | 505-1380          | 985-1360                        | NAM               |                                       | TFGMS218                          | 54.4                           | 164                                                        | 1                                                     | M                                                                                                       | NSA |
| PUIID16585192  | Ca2         | 6179700                 | (ATA)4                       | 12                                | ATTCTCTCAACAACAACAACA            | CATCATGATTCCCTCAAAGT             | 11-988            | 539-904                         | SET               |                                       | TFGMS219                          | 55.6                           | 143                                                        | 1                                                     | M                                                                                                       | NSA |
| PUIID16585193  | Ca2         | 6179676                 | (CAA)6                       | 18                                | AACCTTCGAGAGTTTCCCTCA            | AAACTGGTGATGGTGAATAA             | 11-988            | 539-904                         | SET               |                                       | TFGMS220                          | 55.6                           | 152                                                        | 1                                                     | M                                                                                                       | NSA |
| PUIID16585194  | Ca6         | 10864233                | (CT)8                        | 16                                | CTTTCTCTGATCCTTTTCGAT            | GATGCCATGATAATGAATCTG            | 235-3201          | 2194-2259                       | ANK               |                                       | TFGMS221                          | 55.3                           | 154                                                        | 1                                                     | M                                                                                                       | NSA |
| PUIID16585195  | Ca3         | 30320120                | (AGA)5                       | 15                                | GATCTTGAGTGGGATGAGATT            | TCTCTTTTCAACCCTAGACT             | 130-1335          | 613-747                         | BSD               |                                       | TFGMS222                          | 55.6                           | 151                                                        | 1                                                     | M                                                                                                       | NSA |
| PUIID16585196  | Ca3         | 30318959                | (TCATT)3                     | 15                                | ATTAGACCTGTGGAACCAATT            | CATCATCTTCAATATCCCAAC            | 130-1335          | 613-747                         | BSD               |                                       | TFGMS223                          | 55.2                           | 141                                                        | 1                                                     | M                                                                                                       | NSA |
| PUIID16585197  | Ca5         | 29821891                | (TATGC)3                     | 15                                | ACGGAAGTGTGGTTAATTTT             | CACCAACACTCACTACCTAGC            | 425-2239          | 470-712                         | Myb DNA binding   |                                       | TFGMS224                          | 55.4                           | 169                                                        | 1                                                     | M                                                                                                       | NSA |
| PUIID16585198  | Ca1         | 10066335                | (TCA)5                       | 15                                | TCCACCAAGTAGTGAAGATTG            | GCATTCTGATTTTCTGTGTTTG           | 648-1511          | 1002-1463                       | AUX_IAA           |                                       | TFGMS225                          | 55.3                           | 152                                                        | 1                                                     | M                                                                                                       | NSA |
| PUIID16585199  | Ca3         | 28288059                | (GCT)5                       | 15                                | GAAGCATTAGCTGATTCGATA            | GACACTTTGAGAATCCCTTTT            | 835-1743          | 1282-1434                       | Myb DNA binding   |                                       | TFGMS226                          | 54.8                           | 142                                                        | 1                                                     | M                                                                                                       | NSA |
| PUIID16585200  | Ca3         | 28289003                | (TTTGAT)3                    | 18                                | GATTAAATGGTTGTGATGAGGA           | CACATCCACCTTGTTGTCTC             | 835-1743          | 1282-1434                       | Myb DNA binding   |                                       | TFGMS227                          | 55.0                           | 144                                                        | 1                                                     | M                                                                                                       | NSA |
| PUIID16585201  | Ca6         | 5788961                 | (ACA)4                       | 12                                | CAAGTCTGTGTCAACAACAACA           | TGCTAATGGTTGCAATAAAGA            | 459-1627          | 771-1004                        | SBP               |                                       | TFGMS228                          | 54.7                           | 146                                                        | 1                                                     | M                                                                                                       | NSA |
| PUIID16585202  | Ca6         | 5789033                 | (ACA)6                       | 18                                | AGGCTTCTCCTTAAACCAAAA            | GTGTCGTGTTGTTGTGTGTTG            | 459-1627          | 771-1004                        | SBP               |                                       | TFGMS229                          | 55.1                           | 153                                                        | 1                                                     | M                                                                                                       | NSA |
| PUIID16585203  | 0           | 0                       | (ATGGAA)3                    | 18                                | ATCAGGATTTGCTATCCTCTCG           | AAGAAGAAGAGAGATCCTTGAT           | 450-4657          | 1209-1871                       | START             |                                       | TFGMS230                          | 55.1                           | 159                                                        | 1                                                     | M                                                                                                       | NSA |
| PUIID16585204  | Ca3         | 28536088                | (CAA)5                       | 15                                | ACATCAACGATGCTGCTGAG             | CGAGCTTGAGGCTTATTACCG            | 132-1211          | 300-555                         | DSPc              |                                       | TFGMS231                          | 60.0                           | 249                                                        | 1                                                     | M                                                                                                       | NSA |
| PUIID16585205  | Ca4         | 9451512                 | (ATG)4                       | 12                                | TCTGAACAGACAACTCAACA             | ACTGTCACTTGCCGAGTATTA            | 138-1349          | 828-983                         | Myb DNA binding   |                                       | TFGMS232                          | 55.1                           | 149                                                        | 1                                                     | M                                                                                                       | NSA |
| PUIID16585206  | Ca4         | 9451990                 | (CT)7                        | 14                                | ATTTTGATTCTCCTCAGATCC            | GAATATCTTTGCTGCTTATGA            | 138-1349          | 828-983                         | Myb DNA binding   |                                       | TFGMS233                          | 54.9                           | 145                                                        | 1                                                     | M                                                                                                       | NSA |
| PUIID16585207  | Ca3         | 37212970                | (ACC)4                       | 12                                | TCCTATTCCACAACAATGAG             | GTACTTGTGGTGAGCAATAAAC           | 409-948           | 457-594                         | HLH               |                                       | TFGMS234                          | 55.2                           | 153                                                        | 1                                                     | M                                                                                                       | NSA |
| PUIID16585208  | Ca1         | 47743300                | (AAG)6                       | 18                                | CGTTCTAGAATTACACCCTCA            | ATCTGAGGCTTTTCTCACTTC            | 50-631            | 203-328                         | UBN2              |                                       | TFGMS235                          | 54.6                           | 147                                                        | 1                                                     | M                                                                                                       | NSA |
| PUIID16585209  | Ca5         | 40407133                | (CAA)4                       | 12                                | CTCAAATGCCACTTCAGTAAG            | GAGTTGCAGCTTCTAATGATG            | 153-833           | 507-710                         | FHA               |                                       | TFGMS236                          | 55.1                           | 149                                                        | 1                                                     | M                                                                                                       | NSA |
| PUIID16585210  | 0           | 0                       | (CCA)5                       | 15                                | CGTTACAAATGGGTTATCAGG            | CATTACATGTCAAAGGAAGTTG           | 58-624            | 328-573                         | K-Box             |                                       | TFGMS237                          | 54.9                           | 178                                                        | 1                                                     | M                                                                                                       | NSA |
| PUIID16585211  | Ca2         | 35411086                | (AGAAGC)3                    | 18                                | AAAGGTATTTCCCAATAGGTTG           | TTCTATGTTCCAACCTCTTCA            | 523-1968          | 616-1353                        | mTERF             |                                       | TFGMS238                          | 54.9                           | 145                                                        | 1                                                     | M                                                                                                       | NSA |
| PUIID16585212  | Ca5         | 39522908                | (CAA)4                       | 12                                | TAGTGTGGTGGTTGTAGAAGA            | TGAAGATCTTTAGGGTTGTGA            | 12-857            | 174-341                         | Zf-Dof            |                                       | TFGMS239                          | 54.9                           | 154                                                        | 1                                                     | M                                                                                                       | NSA |
| PUIID16585213  | Ca7         | 7866499                 | (ATT)5                       | 15                                | TATCTCAGACTCTTCCCAACA            | CAGTATTAGCCAGCTTTTCTCA           | 402-2114          | 1158-1307                       | HLH               |                                       | TFGMS240                          | 54.9                           | 172                                                        | 1                                                     | M                                                                                                       | NSA |
| PUIID16585214  | Ca7         | 4598079                 | (CT)7                        | 14                                | TTTCACTCATGCTGCTTTCTC            | TCTAACACAACAACGAGTTTCA           | 216-650           | 321-425                         | GATA              |                                       | TFGMS241                          | 54.8                           | 150                                                        | 1                                                     | M                                                                                                       | NSA |
| PUIID16585215  | 0           | 0                       | (TGT)5                       | 15                                | TGTTGTTGTTGTTGTTGTTGT            | TCCACAACAACAACAACAGTA            | 1-1302            | 853-1101                        | Myb DNA binding   |                                       | TFGMS242                          | 54.9                           | 151                                                        | 1                                                     | M                                                                                                       | NSA |
| PUIID16585216  | Ca1         | 3235738                 | (GCT)5                       | 15                                | ATAATGGTTACTTTCGGAGGA            | TCTTCTCGTGTTCATGTTCT             | 178-1098          | 232-504                         | Myb DNA binding   |                                       | TFGMS243                          | 55.4                           | 151                                                        | 1                                                     | M                                                                                                       | NSA |
| PUIID16585217  | Ca3         | 21537463                | (ATCCA)3                     | 15                                | GTGCCACAGTCATCAAGTAAT            | CATGAATTGAGAACGAAGAAG            | 90-830            | 573-782                         | Acetyltransf      |                                       | TFGMS244                          | 55.2                           | 138                                                        | 1                                                     | M                                                                                                       | NSA |
| PUIID16585218  | Ca3         | 21537463                | (CAAAAC)3                    | 15                                | GTGCCACAGTCATCAAGTAAT            | CATGAATTGAGAACGAAGAAG            | 90-830            | 573-782                         | Acetyltransf      |                                       | TFGMS245                          | 55.2                           | 138                                                        | 1                                                     | M                                                                                                       | NSA |

| NCBI Probe IDs | Chromosomes | Physical positions (bp) | Microsatellite repeat-motifs | Microsatellite repeat length (bp) | Forward Primer sequences (5'-3') | Reverse Primer sequences (5'-3') | ORF position (bp) | Functional domain position (bp) | Functional domain | Types of genic microsatellite markers | Actual annealing temperature (°C) | Size (bp) of alleles amplified | Total number of alleles amplified among chickpea varieties | Polymorphic potential monomorphic (M)/polymorphic (P) | R2 value of marker loci showing significant association (P ≤ 0.05) with three major seed and pod traits |
|----------------|-------------|-------------------------|------------------------------|-----------------------------------|----------------------------------|----------------------------------|-------------------|---------------------------------|-------------------|---------------------------------------|-----------------------------------|--------------------------------|------------------------------------------------------------|-------------------------------------------------------|---------------------------------------------------------------------------------------------------------|
| PUIID16585219  | Ca1         | 27094555                | (CAC)6                       | 18                                | CCACAACATCATCTTCAATTG            | ACGAAAGAGTTTGTTGTCAGAT           | 23-1218           | 299-1006                        | mTERF             | TFGMS246                              | 55.5                              | 150                            | 1                                                          | M                                                     | NSA                                                                                                     |
| PUIID16585220  | Ca1         | 307793                  | (AGTTG)3                     | 15                                | GCTTTCCCTTTCTTATGACCAG           | CATGAGGACAAATGAAGTCAATA          | 1-1726            | 956-1189                        | Bromodomain       | TFGMS247                              | 55.6                              | 150                            | 1                                                          | M                                                     | NSA                                                                                                     |
| PUIID16585221  | Ca1         | 311197                  | (CCTCTC)3                    | 18                                | CCATTTCAATCTGTTCTGCTTT           | TGAAGAATTCTGAGTGACCTG            | 1-1726            | 956-1189                        | Bromodomain       | TFGMS248                              | 55.1                              | 157                            | 1                                                          | M                                                     | NSA                                                                                                     |
| PUIID16585222  | Ca7         | 24021470                | (CAC)4                       | 12                                | ATTAGTCAAGGCACAAGTCCA            | TAATATCACTGGGAAATCCAC            | 206-1216          | 356-535                         | Zf-HL-dimer       | TFGMS249                              | 55.1                              | 150                            | 1                                                          | M                                                     | NSA                                                                                                     |
| PUIID16585223  | Ca7         | 34923150                | (ATC)7                       | 21                                | ACCAACCCCTACAAAGTCTCTTG          | GGGAATCCATTAGGATAAAGA            | 88-903            | 144-324                         | Zf-Dof            | TFGMS250                              | 55.0                              | 142                            | 1                                                          | M                                                     | NSA                                                                                                     |
| PUIID16585224  | Ca5         | 38383060                | (AATT)3                      | 12                                | GCTCACCTTCCCTTCTCAAAT            | GAGTCCCCTAGAATGAGATTG            | 115-729           | 217-678                         | FLO-LFY           | TFGMS251                              | 54.5                              | 155                            | 1                                                          | M                                                     | NSA                                                                                                     |
| PUIID16585225  | Ca7         | 8015436                 | (AAC)4                       | 12                                | GCACCTGTTATGCAGTTTTCAT           | ATGATGAAGATGTTGTCTTGC            | 117-1184          | 273-473                         | TCP               | TFGMS252                              | 55.5                              | 146                            | 1                                                          | M                                                     | NSA                                                                                                     |
| PUIID16585226  | Ca6         | 26358317                | (ACT)7                       | 21                                | TGGATAACCCCTTTCTGCTTC            | AGCATTTGGTTTATGTAACGA            | 361-1638          | 1465-1638                       | GRAS              | TFGMS253                              | 55.1                              | 145                            | 1                                                          | M                                                     | NSA                                                                                                     |
| PUIID16585227  | Ca6         | 26358496                | (ATTTT)3                     | 15                                | CCTCTTTTCTTCTGCTGCTTT            | TAAGGTAAACCGTGTGGTGA             | 361-1638          | 1465-1638                       | GRAS              | TFGMS254                              | 54.9                              | 151                            | 1                                                          | M                                                     | NSA                                                                                                     |
| PUIID16585228  | Ca8         | 3522565                 | (AAC)7                       | 21                                | GATGTGGGTCTCAATCTCATA            | TGATAGTTTTGTTGGAGGAA             | 142-1602          | 469-1596                        | GRAS              | TFGMS255                              | 55.0                              | 157                            | 1                                                          | M                                                     | NSA                                                                                                     |
| PUIID16585229  | Ca2         | 14248311                | (AATA)3                      | 12                                | AGAAGGTTAAGAATTGAGGTG            | CCAAACCTTTATGCTTCTCAA            | 205-1128          | 271-462                         | Acetyltransf      | TFGMS256                              | 54.5                              | 147                            | 1                                                          | M                                                     | NSA                                                                                                     |
| PUIID16585230  | Ca2         | 17282355                | (ATC)4                       | 12                                | AGTGAGGTGTTTGTAGGGTTT            | GAGGCATGTGAATCAACAATTC           | 86-1189           | 701-847                         | HLH               | TFGMS257                              | 54.6                              | 156                            | 1                                                          | M                                                     | NSA                                                                                                     |
| PUIID16585231  | Ca7         | 11430446                | (CAA)6                       | 18                                | CACCAACAACACGATATCATT            | ACATGGTGTGAGGTGTATAA             | 6-983             | 429-974                         | GRAS              | TFGMS258                              | 56.0                              | 160                            | 1                                                          | M                                                     | NSA                                                                                                     |
| PUIID16585232  | Ca3         | 29475806                | (CCT)4                       | 12                                | GAACTATGTTTGAAGCATAGG            | AAGAAGCTCGTAGTCCAGTT             | 562-984           | 784-966                         | Zf-C2H2           | TFGMS259                              | 55.0                              | 175                            | 1                                                          | M                                                     | NSA                                                                                                     |
| PUIID16585233  | Ca8         | 4243801                 | (TGA)6                       | 18                                | ATAGGGGAAAGCTGATGATTTA           | TGATAGGCTGTGATGAGATT             | 61-791            | 130-348                         | Myb DNA binding   | TFGMS260                              | 55.0                              | 157                            | 1                                                          | M                                                     | NSA                                                                                                     |
| PUIID16585234  | Ca7         | 8615769                 | (AAGAA)3                     | 15                                | CGTAGAGTTGTTTGTATCTAT            | AGCATACTCAAATGCCTCTCA            | 657-1982          | 912-1124                        | TCP               | TFGMS261                              | 55.5                              | 152                            | 1                                                          | M                                                     | NSA                                                                                                     |
| PUIID16585235  | Ca7         | 8614981                 | (GGA)5                       | 15                                | TCCAACGAATAACCTAACAA             | ATCTCATCTTCCAAACCTTAA            | 657-1982          | 912-1124                        | TCP               | TFGMS262                              | 55.0                              | 153                            | 1                                                          | M                                                     | NSA                                                                                                     |
| PUIID16585236  | Ca7         | 8615383                 | (TATGAA)3                    | 18                                | TTATGAATTTCCACCACCTA             | TAAGATCAAAACAACTCACG             | 657-1982          | 912-1124                        | TCP               | TFGMS263                              | 54.8                              | 154                            | 1                                                          | M                                                     | NSA                                                                                                     |
| PUIID16585237  | Ca8         | 4421516                 | (CTG)6                       | 18                                | AGTTTGCAGCAATCAACAACAG           | GGTTGAGAGTCAACAAATCATC           | 175-1071          | 196-498                         | DUF260            | TFGMS264                              | 55.4                              | 156                            | 1                                                          | M                                                     | NSA                                                                                                     |
| PUIID16585238  | Ca6         | 466377                  | (CTCAAG)3                    | 18                                | GAACTCATTAATTCATCCACA            | GGTTATGTGGTTGTGTGTTGT            | 779-1438          | 896-1051                        | Myb DNA binding   | TFGMS265                              | 55.0                              | 160                            | 1                                                          | M                                                     | NSA                                                                                                     |
| PUIID16585239  | Ca7         | 8794579                 | (TA)8                        | 16                                | TCTCCATTGCTTACAGGTTAT            | AAAATGCACCTTCTGCTGAA             | 271-909           | 529-690                         | HomeoBox          | TFGMS266                              | 54.8                              | 135                            | 1                                                          | M                                                     | NSA                                                                                                     |
| PUIID16585240  | Ca4         | 45052617                | (CTA)5                       | 15                                | AAGAAGAAGCGTCTGTGAAT             | TTTGTCTAATTGCCAAGCAT             | 34-858            | 505-609                         | GATA              | TFGMS267                              | 54.9                              | 161                            | 1                                                          | M                                                     | NSA                                                                                                     |
| PUIID16585241  | Ca1         | 35115366                | (CAA)4                       | 12                                | TTAGGCTTCAACCACTTTA              | CTCTTCAAGAAAAGCAGATTG            | 355-1137          | 652-816                         | Homebox           | TFGMS268                              | 55.2                              | 148                            | 1                                                          | M                                                     | NSA                                                                                                     |
| PUIID16585242  | Ca1         | 35114925                | (GTG)5                       | 15                                | CTTTTTCAGATGGATCTGTGT            | GTGGAGGAAGAGATCAAGTT             | 355-1137          | 652-816                         | Homebox           | TFGMS269                              | 54.7                              | 153                            | 1                                                          | M                                                     | NSA                                                                                                     |
| PUIID16585243  | Ca1         | 35112262                | (TTGAA)3                     | 15                                | TGATGATTCAACCTCAAAATC            | ACCACCACAGTTATCATCATC            | 355-1137          | 652-816                         | Homebox           | TFGMS270                              | 55.1                              | 158                            | 1                                                          | M                                                     | NSA                                                                                                     |
| PUIID16585244  | Ca4         | 32780320                | (ATGGT)3                     | 15                                | TCCCATCAAGATGCTAAATA             | AATCAATCTTTGAGTTTGTGC            | 486-902           | 489-872                         | AUX_1AA           | TFGMS271                              | 55.0                              | 149                            | 1                                                          | M                                                     | NSA                                                                                                     |
| PUIID16585245  | Ca5         | 45592771                | (TAA)7                       | 21                                | ACCACCACAAGAGATTACAA             | CCATAGCTGACAAATGAGAAG            | 97-1074           | 196-375                         | Zf-Dof            | TFGMS272                              | 54.7                              | 143                            | 1                                                          | M                                                     | NSA                                                                                                     |
| PUIID16585246  | Ca5         | 45592771                | (TAC)5                       | 15                                | ACCACCACAAGAGATTACAA             | CCATAGCTGACAAATGAGAAG            | 97-1074           | 196-375                         | Zf-Dof            | TFGMS273                              | 54.7                              | 143                            | 1                                                          | M                                                     | NSA                                                                                                     |
| PUIID16585247  | Ca5         | 45592893                | (TGC)5                       | 15                                | CTTCTCATTTTCTCAAGTATGG           | TTAGCAACCCCTGTGTAATTA            | 97-1074           | 196-375                         | Zf-Dof            | TFGMS274                              | 55.2                              | 157                            | 1                                                          | M                                                     | NSA                                                                                                     |
| PUIID16585248  | Ca7         | 21805504                | (AGC)4                       | 12                                | CTGGTGATTTTTCGTCAAGTC            | CAAGATTCAAAAATAGGGGCTC           | 464-667           | 529-661                         | FAR1              | TFGMS275                              | 54.9                              | 156                            | 1                                                          | M                                                     | NSA                                                                                                     |
| PUIID16585249  | Ca3         | 3414005                 | (TCA)5                       | 15                                | CTCATTTGAAAAGAAGCTGAC            | GCCATTTGAATATCTGTTTGA            | 384-1046          | 123-266                         | Myb DNA binding   | TFGMS276                              | 55.0                              | 145                            | 1                                                          | M                                                     | NSA                                                                                                     |
| PUIID16585250  | Ca3         | 31975587                | (GGAAG)3                     | 15                                | TTCCGAGTAGTAGTGAGAGAAG           | CATCGAGGTATCAGTCTTGA             | 169-1638          | 994-1122                        | HLH               | TFGMS277                              | 54.0                              | 151                            | 1                                                          | M                                                     | NSA                                                                                                     |
| PUIID16585251  | Ca4         | 14812670                | (GAA)6                       | 18                                | AGTAATGATGCAATGAAGACG            | GCATCAATTAAAGTTTGTTCG            | 255-3230          | 2772-2894                       | HomeoBox          | TFGMS278                              | 55.4                              | 149                            | 1                                                          | M                                                     | NSA                                                                                                     |
| PUIID16585252  | Ca5         | 47007624                | (CACG)3                      | 12                                | TTGAACCAATTCGTAACTGTA            | ACAGGTATGGGTATATCCAG             | 540-1652          | 969-1121                        | Med26             | TFGMS279                              | 55.1                              | 145                            | 1                                                          | M                                                     | NSA                                                                                                     |
| PUIID16585253  | Ca1         | 42161413                | (GTT)6                       | 18                                | TGTTGATGTTGTGTTGTGTT             | CAACGTCACAAATACAGGT              | 105-2279          | 918-1327                        | POX               | TFGMS280                              | 54.9                              | 149                            | 1                                                          | M                                                     | NSA                                                                                                     |
| PUIID16585254  | Ca8         | 4627990                 | (TGT)5                       | 15                                | AGAAGGGTTTCATGAGAAAAG            | ACTTTTCGTTCTCTGCTCTCT            | 105-2279          | 918-1322                        | POX               | TFGMS281                              | 55.2                              | 168                            | 1                                                          | M                                                     | NSA                                                                                                     |
| PUIID16585255  | Ca3         | 39742820                | (GAGAGT)3                    | 18                                | AGGTTGGTTGTCTTAAGTTGA            | TTTCTGCTTCACTTATCTTC             | 163-2043          | 1608-1944                       | Response          | TFGMS282                              | 54.0                              | 149                            | 1                                                          | M                                                     | NSA                                                                                                     |
| PUIID16585256  | Ca4         | 11554290                | (AAG)4                       | 12                                | GACCTCCAACAACATAACAA             | CCACTGGTGAAGTTTATTTTG            | 63-1673           | 1216-1475                       | Myb DNA binding   | TFGMS283                              | 55.2                              | 149                            | 1                                                          | M                                                     | NSA                                                                                                     |
| PUIID16585257  | Ca4         | 11554351                | (ATG)4                       | 12                                | TAATGAAGTTGAAGCAAAAGG            | CCACTGGTGAAGTTTATTTTG            | 63-1673           | 1216-1475                       | Myb DNA binding   | TFGMS284                              | 54.9                              | 147                            | 1                                                          | M                                                     | NSA                                                                                                     |
| PUIID16585258  | Ca4         | 11553680                | (CCA)4                       | 12                                | GTCCAAGAAAGATCAACAACA            | TCTTCTCTTCTTCCATGCTA             | 63-1673           | 1216-1475                       | Myb DNA binding   | TFGMS285                              | 55.3                              | 154                            | 1                                                          | M                                                     | NSA                                                                                                     |
| PUIID16585259  | Ca4         | 11554351                | (GAA)5                       | 15                                | TAATGAAGTTGAAGCAAAAGG            | TAGGAGTTTGAGCTGACTCTG            | 63-1673           | 1216-1475                       | Myb DNA binding   | TFGMS286                              | 54.9                              | 147                            | 1                                                          | M                                                     | NSA                                                                                                     |
| PUIID16585260  | 0           | 0                       | (AGA)4                       | 12                                | GGAGAAGGTAAAGGTAAAGGA            | AAGAGTTCTCTTCCACTGCT             | 229-1293          | 679-774                         | AP2               | TFGMS287                              | 54.4                              | 149                            | 1                                                          | M                                                     | NSA                                                                                                     |
| PUIID16585261  | Ca7         | 43305901                | (ATC)4                       | 12                                | CTGTTACCAAGGAGGAATTTT            | CCATTTAGTAATTGATGGAC             | 10-567            | 256-387                         | Myb DNA binding   | TFGMS288                              | 55.1                              | 150                            | 1                                                          | M                                                     | NSA                                                                                                     |
| PUIID16585262  | Ca8         | 4022386                 | (CAG)5                       | 15                                | CACACTTTTCCACATCTTCAT            | GAAACGAAGAACTACCACCA             | 415-1980          | 1162-1314                       | AP2               | TFGMS289                              | 55.1                              | 151                            | 1                                                          | M                                                     | NSA                                                                                                     |
| PUIID16585263  | Ca7         | 12121206                | (TTTC)4                      | 16                                | CTCGTCTAGTCTGATTAGGC             | CGGTGGACACTGACTACTACT            | 415-1980          | 1162-1314                       | AP2               | TFGMS290                              | 54.5                              | 150                            | 1                                                          | M                                                     | NSA                                                                                                     |
| PUIID16585264  | Ca4         | 45415318                | (ATAA)4                      | 16                                | AGTGTATGCCCTCAATGACTA            | GGTCACTGTGTGTTGCTTGT             | 270-1436          | 395-509                         | HomeoBox          | TFGMS291                              | 54.8                              | 145                            | 1                                                          | M                                                     | NSA                                                                                                     |
| PUIID16585265  | Ca4         | 45415195                | (ATAAA)3                     | 15                                | GGAGAAGAAATGAAGAAAACG            | AGGCCAAATTTGTTGACTCT             | 270-1436          | 395-509                         | HomeoBox          | TFGMS292                              | 55.4                              | 159                            | 1                                                          | M                                                     | NSA                                                                                                     |
| PUIID16585266  | Ca4         | 45415513                | (ATG)4                       | 12                                | TTGAAAACATTGACTTGATCC            | GGTCACTGTGTGTTGCTTGT             | 270-1436          | 395-509                         | HomeoBox          | TFGMS293                              | 55.2                              | 147                            | 1                                                          | M                                                     | NSA                                                                                                     |
| PUIID16585267  | Ca4         | 45415513                | (ATG)5                       | 15                                | TTGAAAACATTGACTTGATCC            | ATATGGATGCTCAGTACATGC            | 270-1436          | 395-509                         | HomeoBox          | TFGMS294                              | 55.2                              | 147                            | 1                                                          | M                                                     | NSA                                                                                                     |
| PUIID16585268  | Ca7         | 27235019                | (AAC)3                       | 12                                | ACACAATACAGGGCTACAAA             | CCCATAAAGAAAATCGGAGT             | 411-1628          | 1311-1511                       | TCP               | TFGMS295                              | 55.0                              | 171                            | 1                                                          | M                                                     | NSA                                                                                                     |
| PUIID16585269  | Ca7         | 27236676                | (TGG)5                       | 15                                | GTTGTTCTCCCATTCTTCTT             | CATTCTCATCATCTCTTCCA             | 411-1628          | 1311-1511                       | TCP               | TFGMS296                              | 55.0                              | 157                            | 1                                                          | M                                                     | NSA                                                                                                     |
| PUIID16585270  | Ca7         | 27236080                | (TTA)5                       | 15                                | TAGTATCCGGAAATGTCAGTGT           | CGAAGAAATACCACAACAATTT           | 411-1628          | 1311-1511                       | TCP               | TFGMS297                              | 55.8                              | 151                            | 1                                                          | M                                                     | NSA                                                                                                     |
| PUIID16585271  | Ca5         | 47218992                | (CGGAGC)3                    | 18                                | CATAGTCAATCCCCAATAAT             | CAACCCATCTCCCTTTTCTAT            | 646-3210          | 1475-1575                       | Zf-CCOH           | TFGMS298                              | 55.5                              | 148                            | 1                                                          | M                                                     | NSA                                                                                                     |
| PUIID16585272  | Ca6         | 28099917                | (AGT)4                       | 12                                | CCACAATTTTCTTCTTCTTC             | ACCTCACATATTCGCCAGAAT            | 385-2919          | 874-1506                        | START             | TFGMS299                              | 55.2                              | 142                            | 1                                                          | M                                                     | NSA                                                                                                     |
| PUIID16585273  | Ca3         | 17180326                | (ACA)4                       | 12                                | CAAGTTCAGAGGCTCAATTCA            | GAAGACCAGGAAGCTTACGTG            | 242-2649          | 1847-1951                       | WD40              | TFGMS300                              | 54.9                              | 145                            | 1                                                          | M                                                     | NSA                                                                                                     |
| PUIID16585274  | Ca2         | 28016351                | (AAT)4                       | 12                                | TGGCATAAAAGTTTGTCTTAA            | CACGACGGCAACTACTACTAT            | 242-2743          | 2052-2362                       | B3                | TFGMS301                              | 55.2                              | 182                            | 1                                                          | M                                                     | NSA                                                                                                     |
| PUIID16585275  | Ca1         | 24070590                | (CAA)4                       | 12                                | AATTTGACAGCAAAACATCTC            | CATAAGCTGAGACTGCAAAAG            | 777-4139          | 1152-1460                       | B3                | TFGMS302                              | 54.5                              | 142                            | 1                                                          | M                                                     | NSA                                                                                                     |
| PUIID16585276  | Ca1         | 24070990                | (CAA)5                       | 15                                | CCCAACACAGCTCAACAGAAT            | GTTGCTGTTCTGAGATGTTTT            | 777-4139          | 1152-1460                       | B3                | TFGMS303                              | 55.1                              | 146                            | 1                                                          | M                                                     | NSA                                                                                                     |
| PUIID16585277  | Ca1         | 24070590                | (CAG)4                       | 12                                | AATTTGACAGCAAAACATCTC            | CGTTTGTAAACAGCAGTGC              | 777-4139          | 1152-1460                       | B3                | TFGMS304                              | 54.5                              | 142                            | 1                                                          | M                                                     | NSA                                                                                                     |
| PUIID16585278  | 0           | 0                       | (CAG)5                       | 15                                | TTACAAACGCCGCTAAAC               | TACTGGTTGCTGTAGACACTG            | 777-4139          | 1152-1460                       | B3                | TFGMS305                              | 55.1                              | 168                            | 1                                                          | M                                                     | NSA                                                                                                     |
| PUIID16585279  | Ca1         | 24071234                | (CAGCAA)3                    | 18                                | GATGATCCATCGAAGATATTG            | CTGTTGTGTTGTTGTTGATG             | 777-4139          | 1152-1460                       | B3                | TFGMS306                              | 54.6                              | 153                            | 1                                                          | M                                                     | NSA                                                                                                     |
| PUIID16585280  | Ca1         | 6750581                 | (TC)8                        | 16                                | ACGAATCCAAGTATACAAA              | TCCTTGAAGAATCCACAATA             | 1463-3502         | 1850-2154                       | B3                | TFGMS307                              | 54.9                              | 153                            | 1                                                          | M                                                     | NSA                                                                                                     |

| NCBI Probe IDs | Chromosomes | Physical positions (bp) | Microsatellite repeat-motifs | Microsatellite repeat length (bp) | Forward Primer sequences (5'-3') | Reverse Primer sequences (5'-3') | ORF position (bp) | Functional domain position (bp) | Functional domain | Types of genic microsatellite markers | Actual annealing temperature (°C) | Size (bp) of alleles amplified | Total number of alleles amplified among chickpea varieties | Polymorphic potential monomorphic (M)/polymorphic (P) | R2 value of marker loci showing significant association ( $P \leq 0.05$ ) with three major seed and pod traits |
|----------------|-------------|-------------------------|------------------------------|-----------------------------------|----------------------------------|----------------------------------|-------------------|---------------------------------|-------------------|---------------------------------------|-----------------------------------|--------------------------------|------------------------------------------------------------|-------------------------------------------------------|----------------------------------------------------------------------------------------------------------------|
| PUIID16585281  | Ca1         | 6750581                 | (TCT)6                       | 18                                | ACGAAATCCAACTATACAAA             | TCCTTGAAGAATCCCAAAATA            | 1463-3502         | 1850-2154                       | B3                | TFGMS308                              | 54.9                              | 153                            | 1                                                          | M                                                     | NSA                                                                                                            |
| PUIID16585282  | Ca1         | 13994160                | (AAC)6                       | 18                                | TGAATGTGGTTCTAAATGGAG            | GAAATGCACAGTCGAAAGAG             | 603-2816          | 1371-2030                       | START             | TFGMS309                              | 55.2                              | 150                            | 1                                                          | M                                                     | NSA                                                                                                            |
| PUIID16585283  | Ca3         | 23905366                | (AATT)3                      | 15                                | TCCTTGTCTCATTTGTGGAG             | AGATGAAACGAGAGAGAGGT             | 1067-1870         | 1448-1528                       | Zi-CCCH           | TFGMS310                              | 55.4                              | 150                            | 1                                                          | M                                                     | NSA                                                                                                            |
| PUIID16585284  | Ca3         | 23905324                | (ATTAC)3                     | 15                                | ACCTCTCTCTCGTTTGTATCT            | CAACGAGAAAAACAGCACTA             | 1067-1870         | 1448-1528                       | Zi-CCCH           | TFGMS311                              | 54.8                              | 184                            | 1                                                          | M                                                     | NSA                                                                                                            |
| PUIID16585285  | Ca3         | 29567332                | (TTCT)4                      | 16                                | AGAGAGTGACGTGCTCCTAGA            | CTGAGAGTTCTTCTCCTGAT             | 589-2772          | 2371-2637                       | Ank               | TFGMS312                              | 54.1                              | 151                            | 1                                                          | M                                                     | NSA                                                                                                            |
| PUIID16585286  | Ca1         | 3999638                 | (ACA)6                       | 18                                | TAAAGGTTCTGAGAGAGCAAA            | GAAACTTACATGCTTGTGCTT            | 226-1611          | 445-651                         | TCP               | TFGMS313                              | 54.6                              | 149                            | 1                                                          | M                                                     | NSA                                                                                                            |
| PUIID16585287  | Ca1         | 3998897                 | (ATC)4                       | 12                                | AAAAGCCTTAAACATTGGTTC            | TTCCACCGTCAGTAACCTCAG            | 226-1611          | 445-651                         | TCP               | TFGMS314                              | 55.2                              | 166                            | 1                                                          | M                                                     | NSA                                                                                                            |
| PUIID16585288  | Ca1         | 3999015                 | (TC)7                        | 14                                | TCACCCTCATTTATCATGATC            | ATCTTTCTCCTTTGCTGCTCTC           | 226-1611          | 445-651                         | TCP               | TFGMS315                              | 54.9                              | 142                            | 1                                                          | M                                                     | NSA                                                                                                            |
| PUIID16585289  | Ca1         | 1049812                 | (CT)7                        | 14                                | GGAAAAAGGAAAAAGCAATAC            | AGGTTCAAATGTAATTTGGTG            | 131-3114          | 2161-2259                       | Ank               | TFGMS316                              | 54.8                              | 153                            | 1                                                          | M                                                     | NSA                                                                                                            |
| PUIID16585290  | Ca2         | 30034444                | (AAGA)3                      | 12                                | TTTTTGAGCTGAGAGAAGAA             | AAGATCTGTAGTCAGCTTTTG            | 62-1438           | 149-634                         | Hal               | TFGMS317                              | 54.7                              | 159                            | 1                                                          | M                                                     | NSA                                                                                                            |
| PUIID16585291  | Ca2         | 30034459                | (AGA)5                       | 15                                | ACCCTAACCACTTTCTTTTG             | AAGATTCTGTAGTCAGCTTTTG           | 62-1438           | 149-634                         | Hal               | TFGMS318                              | 55.2                              | 174                            | 1                                                          | M                                                     | NSA                                                                                                            |
| PUIID16585292  | Ca6         | 12437191                | (ATC)4                       | 12                                | AATCTCAGCCTCAACCTCAAT            | CTACAACTTGTGTCGTGTT              | 932-3685          | 1307-1615                       | B3                | TFGMS319                              | 55.6                              | 147                            | 1                                                          | M                                                     | NSA                                                                                                            |
| PUIID16585293  | Ca1         | 47290885                | (ATTT)4                      | 20                                | AGGAATTAAAGTGATGAAAGC            | GTTTAACAAGACGGACCAAT             | 470-1447          | 473-883                         | DUF822            | TFGMS320                              | 55.2                              | 164                            | 1                                                          | M                                                     | NSA                                                                                                            |
| PUIID16585294  | Ca6         | 5509384                 | (TGT)5                       | 15                                | AATCTTCTTCTTTCCCAAG              | GTTTGTCCCTTCAGTITTTAG            | 323-1897          | 1592-1735                       | HLH               | TFGMS321                              | 54.5                              | 151                            | 1                                                          | M                                                     | NSA                                                                                                            |
| PUIID16585295  | Ca6         | 21433878                | (ATA)4                       | 12                                | TTTCTTCAGAGCTTTGGAAA             | GTCATAAACGAACTCAATGC             | 420-3143          | 2127-2381                       | Bromodomain       | TFGMS322                              | 55.2                              | 154                            | 1                                                          | M                                                     | NSA                                                                                                            |
| PUIID16585296  | Ca8         | 5508378                 | (AAC)4                       | 12                                | TTGTTGACGACCTACTGTGACT           | TTTGAGAGAGAACTGGTTGA             | 35-1177           | 920-1027                        | GATA              | TFGMS323                              | 55.0                              | 149                            | 1                                                          | M                                                     | NSA                                                                                                            |
| PUIID16585297  | Ca8         | 5569895                 | (GAGT)3                      | 15                                | AATCCAATCGAAGAGAGAGAG            | ACTCTAGGTTTGTTCACCTTCC           | 149-3886          | 1601-1738                       | GVF               | TFGMS324                              | 55.3                              | 154                            | 1                                                          | M                                                     | NSA                                                                                                            |
| PUIID16585298  | Ca6         | 21718856                | (GGA)6                       | 18                                | TAAAGGAATGATCCATTGAAG            | TGAGAGAAATGATGAGTCCAT            | 52-1188           | 727-879                         | Myb DNA binding   | TFGMS325                              | 54.4                              | 156                            | 1                                                          | M                                                     | NSA                                                                                                            |
| PUIID16585299  | Ca6         | 21718856                | (GGT)6                       | 18                                | TAAAGGAATGATCCATTGAAG            | TGAGAGAAATGATGAGTCCAT            | 52-1188           | 727-879                         | Myb DNA binding   | TFGMS326                              | 54.4                              | 156                            | 1                                                          | M                                                     | NSA                                                                                                            |
| PUIID16585300  | 0           | 0                       | (AT)6                        | 12                                | CGAGATCAGACCATCATTTACT           | AGTGACATTTGTTGTAAAGCAG           | 191-1627          | 947-1183                        | DOG               | TFGMS327                              | 54.3                              | 157                            | 1                                                          | M                                                     | NSA                                                                                                            |
| PUIID16585301  | Ca3         | 25672140                | (AAC)4                       | 12                                | CAACTACGTTTCATGTTCCATT           | ATCGAAAGAAGAGCGTAA               | 199-1638          | 1063-1200                       | HLH               | TFGMS328                              | 55.2                              | 149                            | 1                                                          | M                                                     | NSA                                                                                                            |
| PUIID16585302  | Ca3         | 25672329                | (CAC)6                       | 18                                | TATGGGAACAACAACACTTC             | GAAGTGTGTTTGTTCGCCATA            | 199-1638          | 1063-1200                       | HLH               | TFGMS329                              | 55.2                              | 153                            | 1                                                          | M                                                     | NSA                                                                                                            |
| PUIID16585303  | Ca7         | 10115566                | (TCTGAA)3                    | 18                                | TGAACATCCCCCTTAGGAAC             | GAAGTTGATGAGTTTGATTCG            | 235-1188          | 742-897                         | AP2               | TFGMS330                              | 55.0                              | 153                            | 1                                                          | M                                                     | NSA                                                                                                            |
| PUIID16585304  | Ca6         | 12569883                | (AC)12                       | 24                                | TTCTTTTTGTTCTCACCACAC            | CCTTTGGGTGTAAGAGGTTACT           | 840-2244          | 1029-1292                       | TCP               | TFGMS331                              | 54.6                              | 138                            | 1                                                          | M                                                     | NSA                                                                                                            |
| PUIID16585305  | Ca6         | 12571338                | (ATT)6                       | 18                                | CAAGCACAACATTTCTCTC              | GAATCTCATCTCCGTCACATC            | 840-2244          | 1029-1292                       | TCP               | TFGMS332                              | 55.2                              | 153                            | 1                                                          | M                                                     | NSA                                                                                                            |
| PUIID16585306  | Ca6         | 12572068                | (CA)5                        | 15                                | GTCAAGGTGTGATATCGTGT             | TGAATGCTCTAATTTGATTTG            | 840-2244          | 1029-1292                       | TCP               | TFGMS333                              | 55.0                              | 151                            | 1                                                          | M                                                     | NSA                                                                                                            |
| PUIID16585307  | Ca6         | 12581322                | (CATTTT)3                    | 18                                | TGTATGCTAGCTGTTGTGCA             | AGTGAATGAAGCTGTTTGAGA            | 840-2244          | 1029-1292                       | TCP               | TFGMS334                              | 54.6                              | 144                            | 1                                                          | M                                                     | NSA                                                                                                            |
| PUIID16585308  | Ca6         | 12572633                | (GGA)5                       | 15                                | TCTCATCTTCAGAGGTTTTC             | GAGACAGAGAATTTGGACTGAA           | 840-2244          | 1029-1292                       | TCP               | TFGMS335                              | 55.1                              | 149                            | 1                                                          | M                                                     | NSA                                                                                                            |
| PUIID16585309  | Ca6         | 12572722                | (TCA)6                       | 18                                | TGCTTCTTCTGCTACTACTGC            | AGTGAATGAAGCTGTTTGAGA            | 840-2244          | 1029-1292                       | TCP               | TFGMS336                              | 55.3                              | 148                            | 1                                                          | M                                                     | NSA                                                                                                            |
| PUIID16585310  | Ca1         | 14717136                | (CA)5                        | 15                                | CAAGAGATCATTTCAAATGGA            | TTTCACTTCTCATCATCAACGA           | 132-1361          | 232-434                         | Myb DNA binding   | TFGMS337                              | 55.3                              | 153                            | 1                                                          | M                                                     | NSA                                                                                                            |
| PUIID16585311  | 0           | 0                       | (TGC)7                       | 21                                | CTTCAAACCAAAACAAGACAC            | ACAAATTTGTGCTCTTTTGG             | 286-1980          | 1273-1485                       | Sigma70           | TFGMS338                              | 54.9                              | 169                            | 1                                                          | M                                                     | NSA                                                                                                            |
| PUIID16585312  | Ca1         | 16679439                | (ATT)4                       | 12                                | AGAAAGGACATAGAGATCGTT            | CATTTTCATTTCTATTGAAG             | 368-1387          | 971-1348                        | NAM               | TFGMS339                              | 54.6                              | 160                            | 1                                                          | M                                                     | NSA                                                                                                            |
| PUIID16585313  | Ca1         | 16680825                | (TATTT)3                     | 15                                | GTGAAAGAGGGTCTTTATCTTG           | ACATCGTCAAGAAAGAAGACAA           | 368-1387          | 971-1348                        | NAM               | TFGMS340                              | 54.8                              | 150                            | 1                                                          | M                                                     | NSA                                                                                                            |
| PUIID16585314  | Ca4         | 8052238                 | (GATGAA)3                    | 18                                | AAGAGAAACGCATGAATGAT             | AAAGAAACCCATTTGGATAAG            | 257-1462          | 278-1124                        | Tab               | TFGMS341                              | 54.9                              | 164                            | 1                                                          | M                                                     | NSA                                                                                                            |
| PUIID16585315  | Ca3         | 2709400                 | (ACC)5                       | 15                                | ACAAATGTTGAGCAAGAAC              | ACATAAGTAAAGCAAGCTGCG            | 396-1229          | 300-440                         | Zi Bbox           | TFGMS342                              | 55.3                              | 154                            | 1                                                          | M                                                     | NSA                                                                                                            |
| PUIID16585316  | Ca3         | 2708823                 | (GTG)5                       | 15                                | TTGTTTAAAGTGGAAGTTGATG           | GCTTCATCTTCATCTTCCATA            | 396-1229          | 300-440                         | Zi Bbox           | TFGMS343                              | 55.3                              | 147                            | 1                                                          | M                                                     | NSA                                                                                                            |
| PUIID16585317  | Ca4         | 48122127                | (ATG)4                       | 12                                | AAAGACGCAAAACATTAAAC             | CACACTGTGGATTCTTGTCTC            | 495-2333          | 1050-1157                       | HomeoBox          | TFGMS344                              | 54.7                              | 159                            | 1                                                          | M                                                     | NSA                                                                                                            |
| PUIID16585318  | Ca4         | 48124978                | (GAA)7                       | 21                                | TGACATCTCCAAACAAGAT              | GGGTGATTGGTGTATGTATG             | 495-2333          | 1050-1157                       | HomeoBox          | TFGMS345                              | 55.6                              | 147                            | 1                                                          | M                                                     | NSA                                                                                                            |
| PUIID16585319  | Ca2         | 34272501                | (ACA)4                       | 12                                | CTTTCTCAATTCCTTCCAAC             | CAGGGAAATGTTGATGGTAGTA           | 37-972            | 529-709                         | WRKY              | TFGMS346                              | 55.2                              | 151                            | 1                                                          | M                                                     | NSA                                                                                                            |
| PUIID16585320  | Ca2         | 34273826                | (ATG)4                       | 12                                | TTTCCATGGCTAATGAGAATA            | CATTGAAACTTGATGAGAAGG            | 37-972            | 529-709                         | WRKY              | TFGMS347                              | 55.0                              | 147                            | 1                                                          | M                                                     | NSA                                                                                                            |
| PUIID16585321  | Ca1         | 21506671                | (ATC)6                       | 18                                | CATATATCCAAGGTGTGGTTG            | GTGGTCCAGTGATAATGTTGT            | 168-824           | 186-713                         | YABBY             | TFGMS348                              | 55.4                              | 150                            | 1                                                          | M                                                     | NSA                                                                                                            |
| PUIID16585322  | Ca1         | 21506671                | (ATCA)3                      | 12                                | CATATATCCAAGGTGTGGTTG            | GTGGTCCAGTGATAATGTTGT            | 168-824           | 186-713                         | YABBY             | TFGMS349                              | 55.4                              | 150                            | 1                                                          | M                                                     | NSA                                                                                                            |
| PUIID16585323  | Ca2         | 2409718                 | (CAA)4                       | 12                                | GACTACAAGTTTCTTCCGTC             | CTTTGTGTGCTAATTTTCTCA            | 423-1283          | 627-788                         | HomeoBox          | TFGMS350                              | 54.6                              | 152                            | 1                                                          | M                                                     | NSA                                                                                                            |
| PUIID16585324  | Ca1         | 16011527                | (CAG)4                       | 12                                | GTCAATCAAGACCAATTTTCA            | AGACTGGTGTCTCTCTTAAGT            | 217-624           | 349-552                         | Histone           | TFGMS351                              | 55.2                              | 134                            | 1                                                          | M                                                     | NSA                                                                                                            |
| PUIID16585325  | Ca1         | 46719766                | (TCATAA)3                    | 18                                | GCACAATCTCTCTTTTCTCTC            | CGAGAGTGTGAATTTGGAA              | 149-1957          | 212-1261                        | mTERF             | TFGMS352                              | 55.1                              | 175                            | 1                                                          | M                                                     | NSA                                                                                                            |
| PUIID16585326  | Ca7         | 9867672                 | (AAC)4                       | 12                                | CTGCAACTTCATCTCATCAT             | CCAGGAACCTCTCTTAACCTTT           | 51-924            | 774-845                         | ZiC2H2            | TFGMS353                              | 55.4                              | 154                            | 1                                                          | M                                                     | NSA                                                                                                            |
| PUIID16585327  | Ca7         | 9867339                 | (AAGAAC)3                    | 18                                | ATAGTTCGCCCTGAAGAAGATG           | TGAACAACAATCAAGACTCA             | 51-924            | 774-845                         | ZiC2H2            | TFGMS354                              | 55.0                              | 142                            | 1                                                          | M                                                     | NSA                                                                                                            |
| PUIID16585328  | 0           | 0                       | (GTT)5                       | 15                                | GTTTCCCTCGAAGATGTTGAA            | AACAAGGAGAGAAAGAGAGA             | 239-2206          | 521-773                         | Myb DNA binding   | TFGMS355                              | 54.5                              | 154                            | 1                                                          | M                                                     | NSA                                                                                                            |
| PUIID16585329  | 0           | 0                       | (TC)7                        | 14                                | TTTCATCATCTCCTGAATTTG            | GAAGACAAGGAGAGATGCTCC            | 239-2206          | 521-773                         | Myb DNA binding   | TFGMS356                              | 55.3                              | 190                            | 1                                                          | M                                                     | NSA                                                                                                            |
| PUIID16585330  | Ca1         | 5765349                 | (AAC)5                       | 15                                | AACAACAACAACCTCTGGTTTA           | TGATGTAAAGCTTCAAGAGAC            | 55-924            | 709-813                         | HomeoBox          | TFGMS357                              | 54.8                              | 145                            | 1                                                          | M                                                     | NSA                                                                                                            |
| PUIID16585331  | Ca1         | 5765412                 | (ACA)5                       | 15                                | TTCAACAACCTGTAATAACACTAC         | TGATCTTGGCTTAAACAGAAG            | 55-924            | 709-813                         | HomeoBox          | TFGMS358                              | 51.5                              | 166                            | 1                                                          | M                                                     | NSA                                                                                                            |
| PUIID16585332  | Ca2         | 26835722                | (AAC)4                       | 12                                | TCATGGGTTGATCCTCTAGTA            | TCTCCAATTGTAACCATCATC            | 21-1746           | 1251-1427                       | WRKY              | TFGMS359                              | 55.1                              | 152                            | 1                                                          | M                                                     | NSA                                                                                                            |
| PUIID16585333  | Ca2         | 26832522                | (CAA)6                       | 18                                | CCTTTTAACCCCTGAGATGATT           | ACTTTCACCCCTTAATTTGTT            | 21-1746           | 1251-1427                       | WRKY              | TFGMS360                              | 55.0                              | 155                            | 1                                                          | M                                                     | NSA                                                                                                            |
| PUIID16585334  | Ca1         | 15319914                | (TCTTTC)5                    | 30                                | ATTTAATTTTGGGAGCAACA             | CTGCTTTAGTGAATTTGGTTG            | 1135-3129         | 1207-1332                       | PHD               | TFGMS361                              | 54.9                              | 144                            | 1                                                          | M                                                     | NSA                                                                                                            |
| PUIID16585335  | Ca8         | 8841187                 | (ATTC)6                      | 18                                | GCAGTAGGGTTAGTGTCTTCT            | CTTGGAAATGAAATGGAAGTG            | 289-2259          | 1753-1893                       | HLH               | TFGMS362                              | 54.8                              | 156                            | 1                                                          | M                                                     | NSA                                                                                                            |
| PUIID16585336  | Ca7         | 19466439                | (TCTCT)3                     | 15                                | GCCCTTGAGTTGAGTTAAGAC            | AACTATGGAATGGAAGGTT              | 239-1300          | 437-1273                        | AUX-IAA           | TFGMS363                              | 55.7                              | 145                            | 1                                                          | M                                                     | NSA                                                                                                            |
| PUIID16585337  | Ca4         | 21852453                | (AAC)6                       | 18                                | ACTGACAACAACACATACGA             | AATTGGATGAAGAAAAAGGAG            | 132-1655          | 504-764                         | Myb DNA binding   | TFGMS364                              | 54.8                              | 144                            | 1                                                          | M                                                     | NSA                                                                                                            |
| PUIID16585338  | Ca4         | 21853060                | (ACA)4                       | 12                                | GTCATGGTAGTGTGTTGCTT             | CTGATGAATGAAAACTGCT              | 132-1655          | 504-764                         | Myb DNA binding   | TFGMS365                              | 55.2                              | 144                            | 1                                                          | M                                                     | NSA                                                                                                            |
| PUIID16585339  | Ca4         | 21852247                | (ACA)6                       | 18                                | TCTAAAGTTTCTTCCTTTTCG            | GTGAGGATTTGTTGAATTTG             | 132-1655          | 504-764                         | Myb DNA binding   | TFGMS366                              | 54.9                              | 158                            | 1                                                          | M                                                     | NSA                                                                                                            |
| PUIID16585340  | Ca4         | 21852384                | (CAA)4                       | 12                                | CAAAATTCACAAATCCTCAC             | TGGCTCATCTTCATCACTAAG            | 132-1655          | 504-764                         | Myb DNA binding   | TFGMS367                              | 54.8                              | 148                            | 1                                                          | M                                                     | NSA                                                                                                            |
| PUIID16585341  | 0           | 0                       | (TA)7                        | 14                                | TAAATCCAAAGTTTGTCTGC             | GGCTGAATATGGCTTTACTCT            | 363-2039          | 523-803                         | NAM               | TFGMS368                              | 54.7                              | 166                            | 1                                                          | M                                                     | NSA                                                                                                            |
| PUIID16585342  | Ca6         | 789811                  | (AGA)6                       | 18                                | AGCACTGAGGTGATATTCAGA            | AAATCTCATCGATCCTTCTC             | 258-2126          | 279-1385                        | GRAS              | TFGMS369                              | 55.0                              | 145                            | 1                                                          | M                                                     | NSA                                                                                                            |

| NCBI Probe IDs | Chromosomes | Physical positions (bp) | Microsatellite repeat-motifs | Microsatellite repeat length (bp) | Forward Primer sequences (5'-3') | Reverse Primer sequences (5'-3') | ORF position (bp) | Functional domain position (bp) | Functional domain | Types of genic microsatellite markers | Actual annealing temperature (°C) | Size (bp) of alleles amplified | Total number of alleles amplified among chickpea varieties | Polymorphic potential monomorphic (M)/polymorphic (P) | R2 value of marker loci showing significant association ( $P \leq 0.05$ ) with three major seed and pod traits |
|----------------|-------------|-------------------------|------------------------------|-----------------------------------|----------------------------------|----------------------------------|-------------------|---------------------------------|-------------------|---------------------------------------|-----------------------------------|--------------------------------|------------------------------------------------------------|-------------------------------------------------------|----------------------------------------------------------------------------------------------------------------|
| PUIID16585343  | Ca3         | 14027023                | (AAC)5                       | 15                                | ATACCATGAAACTTGCCTAGC            | CCAAGACCTGATAGAATTTC             | 326-2341          | 1697-1996                       | B3                | TFGMS370                              | 56.1                              | 143                            | 1                                                          | M                                                     | NSA                                                                                                            |
| PUIID16585344  | Ca3         | 14025567                | (AGG)4                       | 12                                | GTAAGCAGAGTCACCTAGTGC            | CACAAGAAAGAGCAAGAGAGAGA          | 326-2341          | 1697-1996                       | B3                | TFGMS371                              | 54.4                              | 156                            | 1                                                          | M                                                     | NSA                                                                                                            |
| PUIID16585345  | Ca3         | 14022308                | (TCTCT)3                     | 18                                | AAGCTTTATGAAGGAGAGACAA           | AAGCTCAGACACAACCTAGAGAC          | 326-2341          | 1697-1996                       | B3                | TFGMS372                              | 55.1                              | 133                            | 1                                                          | M                                                     | NSA                                                                                                            |
| PUIID16585346  | Ca2         | 7604019                 | (GAA)5                       | 15                                | CATGTTCTTAAGGTTTGGATG            | TAAGTAAGCTTGCTCACACCA            | 145-924           | 328-495                         | ZI-HD             | TFGMS373                              | 54.8                              | 148                            | 1                                                          | M                                                     | NSA                                                                                                            |
| PUIID16585347  | 0           | 0                       | (AAC)6                       | 18                                | ATATTTCCACCATTACGCTTT            | GACAAGCTGAAAATGTTTGAC            | 247-1272          | 607-795                         | WRKY              | TFGMS374                              | 55.1                              | 158                            | 1                                                          | M                                                     | NSA                                                                                                            |
| PUIID16585348  | 0           | 0                       | (CAT)11                      | 33                                | GGAAGAGAACATGAAGTGTA             | TACATGTGATGATGTTGATGG            | 247-1272          | 607-795                         | WRKY              | TFGMS375                              | 55.3                              | 158                            | 1                                                          | M                                                     | NSA                                                                                                            |
| PUIID16585349  | Ca2         | 11702592                | (ACT)5                       | 15                                | CAGTGCTCAAGCAGCTATAAT            | TACAAACCAACCCCTACACAG            | 126-410           | 174-407                         | PLN03217          | TFGMS376                              | 55.1                              | 152                            | 1                                                          | M                                                     | NSA                                                                                                            |
| PUIID16585350  | Ca6         | 58334550                | (CAA)4                       | 12                                | TTGTTTGCTCCGTAATTTTAG            | GACAGTGTGGAAAGACAAAG             | 34-1125           | 475-621                         | HLH               | TFGMS377                              | 55.0                              | 153                            | 1                                                          | M                                                     | NSA                                                                                                            |
| PUIID16585351  | Ca6         | 58334307                | (TGTTC)4                     | 24                                | GAATCACAGCCATTAAACAT             | CTCTCGATGAGGTTGGTAGTTA           | 34-1125           | 475-621                         | HLH               | TFGMS378                              | 55.0                              | 147                            | 1                                                          | M                                                     | NSA                                                                                                            |
| PUIID16585352  | Ca1         | 11286316                | (GAA)5                       | 15                                | GTGTCTTCAAAAGATGATCG             | TCCTAATTCATCACTGATCC             | 337-2598          | 349-1467                        | GRAS              | TFGMS379                              | 54.9                              | 159                            | 1                                                          | M                                                     | NSA                                                                                                            |
| PUIID16585353  | Ca8         | 1872182                 | (CAC)4                       | 12                                | TATGTGTCCTTTCCTCTCTC             | CGAGGAATGTTTATCTGTTG             | 508-1521          | 1177-1452                       | HSF               | TFGMS380                              | 55.1                              | 151                            | 1                                                          | M                                                     | NSA                                                                                                            |
| PUIID16585354  | Ca3         | 9307016                 | (AAT)5                       | 15                                | AAGATTCAATGAAACCTCAATTC          | GTGGGTCTTTTCATTATTTT             | 234-1247          | 861-1118                        | Myb DNA binding   | TFGMS381                              | 55.0                              | 157                            | 1                                                          | M                                                     | NSA                                                                                                            |
| PUIID16585355  | Ca6         | 15272295                | (GGT)6                       | 18                                | TCCTGTTGAGATTGAGAAGA             | GCTTCTCCCTAAAATTCATA             | 237-1841          | 468-1132                        | Bromodomain       | TFGMS382                              | 55.1                              | 149                            | 1                                                          | M                                                     | NSA                                                                                                            |
| PUIID16585356  | Ca5         | 31758233                | (TGT)5                       | 15                                | GGAACTCCTTGAGAGCTTTC             | TCACAACAACACAGAGAAAT             | 286-2301          | 1174-2010                       | DnaJ              | TFGMS383                              | 54.7                              | 147                            | 1                                                          | M                                                     | NSA                                                                                                            |
| PUIID16585357  | Ca3         | 30969715                | (ATT)4                       | 12                                | AACAGTAGATAGGTTGAGGTTG           | TATCAGTTAGGGTTGAGCTTG            | 670-1548          | 979-1071                        | HLH               | TFGMS384                              | 55.2                              | 153                            | 1                                                          | M                                                     | NSA                                                                                                            |
| PUIID16585358  | Ca7         | 13582408                | (CAA)5                       | 15                                | GATGAGAGTTCCTCCTGTTTC            | CCCTTCCACCTTCTCTGTTG             | 198-1793          | 699-1787                        | GRAS              | TFGMS385                              | 55.4                              | 200                            | 1                                                          | M                                                     | NSA                                                                                                            |
| PUIID16585359  | Ca6         | 12728676                | (AAT)3                       | 12                                | TCAAATCACTGGTGCTAGTT             | TGGAATTGGAATCTGCTGTAA            | 488-2101          | 521-1591                        | GRAS              | TFGMS386                              | 55.1                              | 156                            | 1                                                          | M                                                     | NSA                                                                                                            |
| PUIID16585360  | Ca1         | 12948538                | (AT)6                        | 12                                | TGTATCAAGTAGACAGCAC              | GCATGAAAATCAGAGAGAAA             | 267-1541          | 762-914                         | Myb DNA binding   | TFGMS387                              | 54.7                              | 150                            | 1                                                          | M                                                     | NSA                                                                                                            |
| PUIID16585361  | Ca3         | 19075803                | (AG)6                        | 12                                | TTTGGATATAGAGGATGGTG             | AAGTTTCACTTTTGTGCCTTA            | 391-1329          | 754-888                         | Myb DNA binding   | TFGMS388                              | 55.0                              | 177                            | 1                                                          | M                                                     | NSA                                                                                                            |
| PUIID16585362  | Ca3         | 17936119                | (ATA)3                       | 12                                | GAGCAAGTAGGGTGATAGATCA           | GCAATTAAACCACTGACAAG             | 108-1175          | 129-278                         | Myb DNA binding   | TFGMS389                              | 54.5                              | 141                            | 1                                                          | M                                                     | NSA                                                                                                            |
| PUIID16585363  | Ca3         | 29972354                | (TAGGT)3                     | 18                                | TTTCTCTCTTCTGCAAAACC             | ACCTTAGAGGAAAAGGTCTCA            | 261-1139          | 765-953                         | KH1               | TFGMS390                              | 55.3                              | 148                            | 1                                                          | M                                                     | NSA                                                                                                            |
| PUIID16585364  | Ca8         | 8417199                 | (AT)5                        | 15                                | TGGAAGAAGTGTGTTGAAAT             | CATCATCACTTCTGTTGAAT             | 363-1553          | 747-902                         | Myb DNA binding   | TFGMS391                              | 54.9                              | 153                            | 1                                                          | M                                                     | NSA                                                                                                            |
| PUIID16585365  | Ca1         | 10019673                | (TTC)5                       | 15                                | GAAAATCTTCGGTGTTAGGTT            | CAAGGTGAACCAGGATTAA              | 126-1172          | 444-578                         | Myb DNA binding   | TFGMS392                              | 55.1                              | 144                            | 1                                                          | M                                                     | NSA                                                                                                            |
| PUIID16585366  | Ca5         | 32220400                | (AATAA)3                     | 15                                | CCATACGACGGAATTAATAACA           | CCACTACTTTTGCCTATACCA            | 295-890           | 502-681                         | bZIP              | TFGMS393                              | 55.3                              | 133                            | 1                                                          | M                                                     | NSA                                                                                                            |
| PUIID16585367  | Ca5         | 21801455                | (GAG)5                       | 15                                | CGGATTGAACCTTCTTCAAC             | AAGAGAGAAGCAAGACCTTC             | 210-1232          | 258-500                         | FHA               | TFGMS394                              | 54.9                              | 134                            | 1                                                          | M                                                     | NSA                                                                                                            |
| PUIID16585368  | Ca7         | 34321017                | (AAG)4                       | 12                                | ATCAGAATTTGACAAAGAGGT            | CTTCTCTTTTGATGGTGTG              | 712-1293          | 832-1122                        | B3                | TFGMS395                              | 55.3                              | 153                            | 1                                                          | M                                                     | NSA                                                                                                            |
| PUIID16585369  | Ca7         | 34321017                | (GAA)6                       | 18                                | ATCAGAATTTGACAAGGAGGT            | CTTCTCTTTTGATGGTGTG              | 712-1293          | 832-1122                        | B3                | TFGMS396                              | 55.3                              | 153                            | 1                                                          | M                                                     | NSA                                                                                                            |
| PUIID16585370  | Ca4         | 1220689                 | (AACAA)3                     | 18                                | AACACTTGCTTTCAAACCTCC            | CCAATCCATCTTAACACCA              | 78-839            | 402-500                         | AP2               | TFGMS397                              | 55.1                              | 150                            | 1                                                          | M                                                     | NSA                                                                                                            |
| PUIID16585371  | Ca2         | 14623906                | (AGC)5                       | 15                                | AGCAACCTCCATGAGCTTT              | TCGCTTCTGCTTCTCTTTTC             | 225-998           | 540-950                         | DUF3594           | TFGMS398                              | 55.1                              | 129                            | 1                                                          | M                                                     | NSA                                                                                                            |
| PUIID16585372  | 0           | 0                       | (ATGC)3                      | 12                                | AGACTAGATGGGTTATGCAAGTT          | TGGCAACCTATACTCAAAAT             | 408-1298          | 771-905                         | Myb DNA binding   | TFGMS399                              | 54.7                              | 166                            | 1                                                          | M                                                     | NSA                                                                                                            |
| PUIID16585373  | Ca1         | 4325015                 | (AATC)3                      | 12                                | AGAGTTGCAATGTTGTGAGT             | ACGAAGAGAGTGTAGGGGTT             | 117-1241          | 345-1100                        | mTERF             | TFGMS400                              | 54.9                              | 145                            | 1                                                          | M                                                     | NSA                                                                                                            |
| PUIID16585374  | Ca5         | 38579922                | (ATG)5                       | 15                                | TTTTGAAGTTAGGATGAACA             | CATCAACCTTCTCACTCACAT            | 541-1443          | 1105-1185                       | ZICCC             | TFGMS401                              | 55.0                              | 149                            | 1                                                          | M                                                     | NSA                                                                                                            |
| PUIID16585375  | Ca1         | 2744133                 | (AAT)5                       | 15                                | TTTCTGGTCTTACATGCATC             | AACCTGAATCTTATGTTACCC            | 287-5644          | 5360-5506                       | HomeoBox          | TFGMS402                              | 54.6                              | 163                            | 1                                                          | M                                                     | NSA                                                                                                            |
| PUIID16585376  | Ca5         | 46510392                | (AAG)6                       | 18                                | TATTTATGGGAGAGACAACC             | AATGAACCTCCGATGAGAT              | 130-1089          | 481-680                         | bZIP              | TFGMS403                              | 55.7                              | 166                            | 1                                                          | M                                                     | NSA                                                                                                            |
| PUIID16585377  | Ca5         | 30816603                | (GAA)5                       | 15                                | GCTACAATTGGCATATGAAG             | TAGCAGGTGATAGTTGCTCTT            | 100-1257          | 556-699                         | HLH               | TFGMS404                              | 55.1                              | 151                            | 1                                                          | M                                                     | NSA                                                                                                            |
| PUIID16585378  | 0           | 0                       | (GGC)5                       | 15                                | ATACGTGGGAGAGAAAAGAT             | AAGCCCAATTCATTACACCTT            | 236-1222          | 572-652                         | ZICCC             | TFGMS405                              | 54.6                              | 162                            | 1                                                          | M                                                     | NSA                                                                                                            |
| PUIID16585379  | Ca1         | 2632048                 | (GAA)5                       | 15                                | AGAAGAAGAAGAAGAGTGGT             | TTCTTCTCCCTTCTCCTCA              | 357-2489          | 1146-1205                       | ZICCC             | TFGMS406                              | 55.9                              | 149                            | 1                                                          | M                                                     | NSA                                                                                                            |
| PUIID16585380  | Ca1         | 2631745                 | (GAG)6                       | 18                                | GGAAGCAGAAACAGTAGAGGT            | CTGCCCTTCTCTCATCAAC              | 357-2489          | 1146-1205                       | ZICCC             | TFGMS407                              | 55.3                              | 165                            | 1                                                          | M                                                     | NSA                                                                                                            |
| PUIID16585381  | Ca4         | 5495431                 | (TGT)5                       | 15                                | GTGGTGTGGTGTGAACATT              | TCAACCAACTTTGTCTATGAAG           | 386-1366          | 815-970                         | HLH               | TFGMS408                              | 54.9                              | 143                            | 1                                                          | M                                                     | NSA                                                                                                            |
| PUIID16585382  | Ca1         | 23712291                | (TAA)5                       | 15                                | CTTAACCATGAGTATTAACAAG           | ATCTGTTTTTGGCAACACTTT            | 201-968           | 558-659                         | Illy              | TFGMS409                              | 50.7                              | 116                            | 1                                                          | M                                                     | NSA                                                                                                            |
| PUIID16585383  | Ca4         | 46457630                | (CTT)6                       | 18                                | CCCTCTTTTCATTCTCTCAT             | TTCTTTGAGGAAGAAGCTG              | 1-744             | 274-402                         | HLH               | TFGMS410                              | 55.1                              | 156                            | 1                                                          | M                                                     | NSA                                                                                                            |
| PUIID16585384  | Ca5         | 40078153                | (ATCACA)3                    | 18                                | CATGTCCAATTAACCATCAGAT           | TTCTTGTCGCTATAATCATC             | 62-1936           | 209-1360                        | ElN3              | TFGMS411                              | 55.7                              | 151                            | 1                                                          | M                                                     | NSA                                                                                                            |
| PUIID16585385  | Ca5         | 40076484                | (ATG)4                       | 12                                | TGAGGATTATTTTTCATTGG             | AAAGGATGCAAAATCAACAATG           | 62-1936           | 209-1360                        | ElN3              | TFGMS412                              | 52.8                              | 158                            | 1                                                          | M                                                     | NSA                                                                                                            |
| PUIID16585386  | Ca5         | 18185574                | (AAGAT)3                     | 15                                | ATTCCGATAAATGGCTTACTT            | TTCTCCAAGCAACTATGAAAAA           | 1323-2081         | 1353-1502                       | Sigma70           | TFGMS413                              | 54.8                              | 152                            | 1                                                          | M                                                     | NSA                                                                                                            |
| PUIID16585387  | Ca6         | 20762847                | (AAAGA)3                     | 15                                | AGGAGGGGTTTCTCTTTAAT             | GAAACTGTTTGTGCTGTGAAG            | 162-875           | 492-641                         | HLH               | TFGMS414                              | 55.2                              | 166                            | 1                                                          | M                                                     | NSA                                                                                                            |
| PUIID16585388  | 0           | 0                       | (TGA)6                       | 18                                | TTTTGTTTCTGGGAAATTG              | AATCCTATTCTCCCTCTCTCT            | 162-875           | 492-641                         | HLH               | TFGMS415                              | 55.4                              | 149                            | 1                                                          | M                                                     | NSA                                                                                                            |
| PUIID16585389  | Ca6         | 20762848                | (TTA)5                       | 15                                | AAGGAGGGGTTTGTGCTTAT             | AATCCTATTCTCCCTCTCTCT            | 162-875           | 492-641                         | HLH               | TFGMS416                              | 55.2                              | 134                            | 1                                                          | M                                                     | NSA                                                                                                            |
| PUIID16585390  | Ca4         | 4988607                 | (AAT)6                       | 18                                | TCATTTCTTGCCCTATAGAA             | AGGTGAGGCTAGTATAGGAA             | 312-1070          | 339-1025                        | AUX-1AA           | TFGMS417                              | 54.9                              | 152                            | 1                                                          | M                                                     | NSA                                                                                                            |
| PUIID16585391  | Ca7         | 26882637                | (AGT)3                       | 12                                | TCACCTTCTGCTTCTTACAG             | GATAAAGGCAACACAGAAACAA           | 29-592            | 239-472                         | SBP               | TFGMS418                              | 54.9                              | 152                            | 1                                                          | M                                                     | NSA                                                                                                            |
| PUIID16585392  | 0           | 0                       | (AT)9                        | 18                                | ACCAACTAAAGAATCAGAGC             | TCGAAATGGTGATAGATAAA             | 231-998           | 468-731                         | FAR1              | TFGMS419                              | 53.0                              | 158                            | 1                                                          | M                                                     | NSA                                                                                                            |
| PUIID16585393  | Ca2         | 26158080                | (TGC)5                       | 15                                | AGATCGGTGATAAGGAGTTTT            | ACAGCAGATGTCCTAACTA              | 107-1144          | 259-427                         | FHA               | TFGMS420                              | 54.6                              | 157                            | 1                                                          | M                                                     | NSA                                                                                                            |
| PUIID16585394  | Ca6         | 29745989                | (TGI)8                       | 16                                | TGATGATTTCTCACTTTCTCC            | ACTCATCAATCAGAGAGATCA            | 439-885           | 445-813                         | YABBY             | TFGMS421                              | 54.4                              | 147                            | 1                                                          | M                                                     | NSA                                                                                                            |
| PUIID16585395  | Ca4         | 4368581                 | (ATC)5                       | 15                                | AAAGAACCATTCCCAAGAGAC            | AAATTTATCATCCCAAGGACT            | 502-1671          | 1336-1413                       | ZICCC             | TFGMS422                              | 55.0                              | 152                            | 1                                                          | M                                                     | NSA                                                                                                            |
| PUIID16585396  | Ca8         | 14983014                | (CATTT)3                     | 15                                | TAAACCATCATCTCTCTCCA             | TTTGGGTTTGAATGTGTGAT             | 105-542           | 368-524                         | HTH               | TFGMS423                              | 55.7                              | 173                            | 1                                                          | M                                                     | NSA                                                                                                            |
| PUIID16585397  | Ca4         | 3715855                 | (CCCTC)3                     | 18                                | AAATAACATCAGAAGGCCACTG           | ATTGTGACTCAAGGCCCTAAAT           | 198-1661          | 330-473                         | PHD               | TFGMS424                              | 54.6                              | 135                            | 1                                                          | M                                                     | NSA                                                                                                            |
| PUIID16585398  | Ca4         | 42774790                | (CAA)4                       | 12                                | CTTTCAAATTTTGTCCAATG             | GTAAGGGTGGTTGAATTTT              | 416-1084          | 500-955                         | DUF702            | TFGMS425                              | 55.1                              | 145                            | 1                                                          | M                                                     | NSA                                                                                                            |
| PUIID16585399  | Ca8         | 3154271                 | (CA)5                        | 15                                | AGCAAGTGTCTACACCAAGA             | AACAGGGGAAAGATCTGTGAA            | 54-1037           | 516-653                         | HLH               | TFGMS426                              | 55.1                              | 139                            | 1                                                          | M                                                     | NSA                                                                                                            |
| PUIID16585400  | 0           | 0                       | (AAATG)3                     | 18                                | CTGATGAACAGTGTGATGTA             | CTTTTCTTAACGCCCTGTAT             | 405-1076          | 477-572                         | AP2               | TFGMS427                              | 54.5                              | 150                            | 1                                                          | M                                                     | NSA                                                                                                            |
| PUIID16585401  | Ca7         | 1270756                 | (AG)6                        | 12                                | TGAGAATGTTTGAAGAGGA              | TTCCATTCTACATTCACAGT             | 368-1570          | 800-892                         | HLH               | TFGMS428                              | 55.0                              | 153                            | 1                                                          | M                                                     | NSA                                                                                                            |
| PUIID16585402  | Ca1         | 9679421                 | (ACGTT)3                     | 18                                | ACATCCCTAAGACCACTCCTT            | TGTTTTCTTGTTCTCATCGT             | 86-953            | 839-821                         | ovate             | TFGMS429                              | 55.2                              | 164                            | 1                                                          | M                                                     | NSA                                                                                                            |
| PUIID16585403  | Ca2         | 6182801                 | (TGAT)4                      | 16                                | GACCTCACAATGGAGACAGTA            | TTTAAGATTTGCTGAATCCTG            | 186-854           | 294-545                         | DUF260            | TFGMS430                              | 55.1                              | 128                            | 1                                                          | M                                                     | NSA                                                                                                            |
| PUIID16585404  | Ca7         | 28548004                | (AATT)6                      | 24                                | GCTCCTCATTAACTCATTTC             | AGGGTGAAGTGAGATCTTTT             | 786-1760          | 975-1211                        | SBP               | TFGMS431                              | 55.5                              | 168                            | 1                                                          | M                                                     | NSA                                                                                                            |

| NCBI Probe IDs | Chromosomes | Physical positions (bp) | Microsatellite repeat-motifs | Microsatellite repeat length (bp) | Forward Primer sequences (5'-3') | Reverse Primer sequences (5'-3') | ORF position (bp) | Functional domain position (bp) | Functional domain | Types of genic microsatellite markers | Actual annealing temperature (°C) | Size (bp) of alleles amplified | Total number of alleles amplified among chickpea varieties | Polymorphic potential monomorphic (M)/polymorphic (P) | R2 value of marker loci showing significant association ( $P \leq 0.05$ ) with three major seed and pod traits |
|----------------|-------------|-------------------------|------------------------------|-----------------------------------|----------------------------------|----------------------------------|-------------------|---------------------------------|-------------------|---------------------------------------|-----------------------------------|--------------------------------|------------------------------------------------------------|-------------------------------------------------------|----------------------------------------------------------------------------------------------------------------|
| PUID16585405   | Ca7         | 7474741                 | (ATC)5                       | 15                                | GCAAGTCATGCACAAAAGTAT            | CTTATCTGAACCTGTGGTGGT            | 112-1014          | 136-288                         | Myb DNA binding   | TFGMS432                              | 55.5                              | 148                            | 1                                                          | M                                                     | NSA                                                                                                            |
| PUID16585406   | Ca2         | 3204755                 | (AAGAT)3                     | 18                                | CCATGGATAAAGAGAAATGA             | CCAACTGCTCTGTATCCATA             | 357-1247          | 789-950                         | HomeoBox          | TFGMS433                              | 54.4                              | 145                            | 1                                                          | M                                                     | NSA                                                                                                            |
| PUID16585407   | Ca2         | 3204755                 | (AGATAT)3                    | 18                                | CCATGGATAAAGAGAAATGA             | CCAACTGCTCTGTATCCATA             | 357-1247          | 789-950                         | HomeoBox          | TFGMS434                              | 54.4                              | 145                            | 1                                                          | M                                                     | NSA                                                                                                            |
| PUID16585408   | Ca2         | 3204627                 | (ATG)5                       | 15                                | GAAATGATGATGAGTTGGAAA            | CCAACTGCTCTGTATCCATA             | 357-1247          | 789-950                         | HomeoBox          | TFGMS435                              | 55.1                              | 145                            | 1                                                          | M                                                     | NSA                                                                                                            |
| PUID16585409   | Ca2         | 3204755                 | (TATAG)4                     | 20                                | CCATGGATAAAGAGAAATGA             | TTCTTCTTTATCCATGGCTTT            | 357-1247          | 789-950                         | HomeoBox          | TFGMS436                              | 54.4                              | 145                            | 1                                                          | M                                                     | NSA                                                                                                            |
| PUID16585410   | Ca8         | 14961209                | (ATC)4                       | 12                                | ATTTTCAGCTTGTAGGCAATC            | AATTGCGACCTTACAATATCA            | 221-1375          | 713-976                         | Myb DNA binding   | TFGMS437                              | 54.6                              | 149                            | 1                                                          | M                                                     | NSA                                                                                                            |
| PUID16585411   | Ca8         | 14955395                | (CTC)5                       | 15                                | CATCATCTGTGGCTCTTATGT            | TTTCGAAGATGCAAGAGTAG             | 221-1375          | 713-976                         | Myb DNA binding   | TFGMS438                              | 54.5                              | 167                            | 1                                                          | M                                                     | NSA                                                                                                            |
| PUID16585412   | Ca5         | 43831503                | (TATTA)3                     | 15                                | CCAATAACAACACACTCTCC             | ATCTTGATGCAAGACTAAGCA            | 454-1473          | 613-699                         | bZIP              | TFGMS439                              | 54.7                              | 165                            | 1                                                          | M                                                     | NSA                                                                                                            |
| PUID16585413   | 0           | 0                       | (CGGT)3                      | 15                                | CTGTTCTCTCGGTGACATCT             | ATTGTTTTCAACAGAGCTCAA            | 497-1072          | 788-979                         | Histone           | TFGMS440                              | 55.3                              | 149                            | 1                                                          | M                                                     | NSA                                                                                                            |
| PUID16585414   | Ca4         | 45445882                | (TAT)5                       | 15                                | GGCAAAATATGGTTGTTGAGTA           | CAACACAAGCACGTAAATAGA            | 1-583             | 344-475                         | Myb DNA binding   | TFGMS441                              | 55.3                              | 149                            | 1                                                          | M                                                     | NSA                                                                                                            |
| PUID16585415   | Ca1         | 2948290                 | (AAT)4                       | 12                                | GCTGCTTTTAAAATGAGAGGT            | GAAATTGAGCCAGAGCTAGTA            | 17-340            | 191-301                         | AP2               | TFGMS442                              | 55.5                              | 159                            | 1                                                          | M                                                     | NSA                                                                                                            |
| PUID16585416   | 0           | 0                       | (CATTT)4                     | 16                                | TATCTAGCTAGGTGCGAGTGA            | AAATTTTGATTCTACAGGAACC           | 95-710            | 194-439                         | FHA               | TFGMS443                              | 55.3                              | 141                            | 1                                                          | M                                                     | NSA                                                                                                            |
| PUID16585417   | Ca5         | 36711446                | (AAC)4                       | 12                                | TCTTTCCATTTTCCAACTA              | GTGTTGTAGTTGGTGTGTG              | 18-611            | 93-374                          | HSF               | TFGMS444                              | 55.0                              | 151                            | 1                                                          | M                                                     | NSA                                                                                                            |
| PUID16585418   | Ca5         | 36711369                | (CAC)4                       | 12                                | AAACACAACCTCAACAACATC            | AATTGTTGGTTTGTTCATCAG            | 18-611            | 93-374                          | HSF               | TFGMS445                              | 55.0                              | 149                            | 1                                                          | M                                                     | NSA                                                                                                            |
| PUID16585419   | Ca3         | 31248824                | (CCAAA)3                     | 18                                | AAATGGATTTTGATTTCTCCTC           | ACTCCTCTAAACACCTTTTG             | 100-669           | 403-504                         | AP2               | TFGMS446                              | 54.9                              | 148                            | 1                                                          | M                                                     | NSA                                                                                                            |
| PUID16585420   | Ca3         | 31248872                | (TATCAT)3                    | 18                                | TCTACTTCCTGTAAGTAATCCT           | TCATTGCGAAGGGTATTGTTG            | 100-669           | 403-504                         | AP2               | TFGMS447                              | 54.7                              | 150                            | 1                                                          | M                                                     | NSA                                                                                                            |
| PUID16585421   | Ca6         | 5689236                 | (TGC)5                       | 15                                | ACCTGCTCTCTGTCTGATGT             | AGCCCTCATTTTCTCAGTGT             | 135-788           | 591-761                         | LIM               | TFGMS448                              | 54.5                              | 152                            | 1                                                          | M                                                     | NSA                                                                                                            |
| PUID16585422   | Ca7         | 20120728                | (CTT)5                       | 15                                | CATCAAAAGGCTTCTCCTAAT            | TTTTGAAAGTAGTGGCTTGA             | 128-840           | 677-832                         | Myb DNA binding   | TFGMS449                              | 55.3                              | 157                            | 1                                                          | M                                                     | NSA                                                                                                            |
| PUID16585423   | Ca7         | 20120215                | (TTG)6                       | 18                                | AGAAACAAAAGAGAGAAACA             | TGAAGAAGAGACGCTAATGG             | 128-840           | 677-832                         | Myb DNA binding   | TFGMS450                              | 55.0                              | 149                            | 1                                                          | M                                                     | NSA                                                                                                            |
| PUID16585424   | Ca6         | 35239470                | (CA)5                        | 15                                | CTATCCTTTAATTTCCCGAAG            | TTTCTATTGAAGGAGAGGGTAG           | 69-443            | 141-293                         | AP2               | TFGMS451                              | 54.9                              | 141                            | 1                                                          | M                                                     | NSA                                                                                                            |
| PUID16585425   | Ca4         | 44394673                | (ATGCA)4                     | 20                                | GAAGAAAGACAGAGGAAAAAGAA          | GGCTTAGCCAAAGACATTATC            | 253-1314          | 376-510                         | ZiB-Box           | TFGMS452                              | 54.7                              | 163                            | 1                                                          | M                                                     | NSA                                                                                                            |
| PUID16585426   | Ca2         | 7604031                 | (ACA)4                       | 12                                | GTTTGGATGCTAAACAACAAG            | CTCAGCATTCATTCAGGCTTT            | 368-1354          | 575-736                         | Zi-HD             | TFGMS453                              | 55.8                              | 153                            | 1                                                          | M                                                     | NSA                                                                                                            |
| PUID16585427   | Ca3         | 3617903                 | (CAA)5                       | 15                                | TAGATGTTAGAGCCATGGACA            | GATTTTTGGTGTGTTTGTGT             | 368-1354          | 575-736                         | Zi-HD             | TFGMS454                              | 55.9                              | 152                            | 1                                                          | M                                                     | NSA                                                                                                            |
| PUID16585428   | Ca3         | 23992706                | (ACAT)3                      | 12                                | GAAGAGAAAAGCAAGAAAG              | TTTATGTCTGAGAGACACAA             | 144-1238          | 195-572                         | NAM               | TFGMS455                              | 55.3                              | 149                            | 1                                                          | M                                                     | NSA                                                                                                            |
| PUID16585429   | Ca6         | 16432035                | (ATCAAC)3                    | 18                                | CAACACATAACTCCATCTTCA            | GAGAGCAGAGATGATGATCTG            | 144-1238          | 195-572                         | NAM               | TFGMS456                              | 54.7                              | 150                            | 1                                                          | M                                                     | NSA                                                                                                            |
| PUID16585430   | Ca5         | 47316816                | (AAAAG)3                     | 15                                | AAATACATCAACGACTCAACG            | GGGGTGTAGTTTAAGGTTGTT            | 267-1331          | 930-1310                        | NAM               | TFGMS457                              | 54.6                              | 154                            | 1                                                          | M                                                     | NSA                                                                                                            |
| PUID16585431   | Ca5         | 30726721                | (AGAA)3                      | 12                                | TGAAGCTTCTTTTCTGTTTTT            | CCCACCTTCTTTTCTGCTCTA            | 272-739           | 473-652                         | bZIP              | TFGMS458                              | 54.6                              | 161                            | 1                                                          | M                                                     | NSA                                                                                                            |
| PUID16585432   | Ca5         | 30725711                | (CT)8                        | 16                                | TCATTTATAGAAGCAGCAGCT            | ATCATTTGGGTTGGTTGAAT             | 272-739           | 473-652                         | bZIP              | TFGMS459                              | 54.4                              | 148                            | 1                                                          | M                                                     | NSA                                                                                                            |
| PUID16585433   | Ca7         | 4490042                 | (AGA)4                       | 12                                | ACTGGATCGGATTAATGTTCT            | AATCAGATGATTCTGACGATG            | 215-1000          | 485-601                         | ZiCCCH            | TFGMS460                              | 54.5                              | 145                            | 1                                                          | M                                                     | NSA                                                                                                            |
| PUID16585434   | Ca2         | 3582806                 | (AAT)6                       | 18                                | CCTCTATGGTTTCATCATCTA            | GTTGGTGGAACATTCTATTAT            | 191-1456          | 230-373                         | Myb DNA binding   | TFGMS461                              | 55.2                              | 155                            | 1                                                          | M                                                     | NSA                                                                                                            |
| PUID16585435   | Ca5         | 34474930                | (GTT)5                       | 15                                | GAGTACTGGATTGAGCAAGTG            | CTCTCTCTTCATCCACGCTAT            | 64-1329           | 355-505                         | Ilyl              | TFGMS462                              | 55.0                              | 144                            | 1                                                          | M                                                     | NSA                                                                                                            |
| PUID16585436   | Ca4         | 10152488                | (ATC)4                       | 12                                | CTAAAGACCCATCCCTTTTTG            | GTTCATTGGATTTGTACAGG             | 400-1437          | 583-687                         | GATA              | TFGMS463                              | 54.9                              | 151                            | 1                                                          | M                                                     | NSA                                                                                                            |
| PUID16585437   | Ca3         | 25757444                | (TTT)5                       | 15                                | TTCCCTTAACAGACTTTCCGTC           | GAAGGATACAGTATGGGGTGT            | 223-2466          | 1180-1662                       | YDG-SRA           | TFGMS464                              | 55.2                              | 161                            | 1                                                          | M                                                     | NSA                                                                                                            |
| PUID16585438   | Ca6         | 3941697                 | (GGGT)3                      | 18                                | AATCTGGAAGGGACATTAAGAG           | AAGAAAGGGCTCACTAGCTC             | 38-1195           | 410-484                         | ZiCCCH            | TFGMS465                              | 55.0                              | 151                            | 1                                                          | M                                                     | NSA                                                                                                            |
| PUID16585439   | Ca4         | 1493962                 | (CA)4                        | 12                                | GCATCGAATCAATCATCACTTC           | GTGCAAAATTGAGTTTATTC             | 63-1118           | 905-1091                        | WRKY              | TFGMS466                              | 54.9                              | 141                            | 1                                                          | M                                                     | NSA                                                                                                            |
| PUID16585440   | Ca3         | 38615698                | (ACCA)3                      | 12                                | TCACGAGTTTTTTGTTATGGT            | GAGAAATACGAGCCTAGGAAG            | 144-1427          | 864-1085                        | Myb DNA binding   | TFGMS467                              | 54.9                              | 151                            | 1                                                          | M                                                     | NSA                                                                                                            |
| PUID16585441   | Ca3         | 38614643                | (ATT)4                       | 12                                | CCGATACGTTTTTCTCAGTG             | CGCTAATGCTAATTTAATGC             | 144-1427          | 864-1085                        | Myb DNA binding   | TFGMS468                              | 55.1                              | 147                            | 1                                                          | M                                                     | NSA                                                                                                            |
| PUID16585442   | Ca4         | 9472194                 | (AGTT)3                      | 12                                | CGTGTGTCTCTAACCATCTTC            | CTACCTCGTGTGTTTCTGT              | 184-984           | 441-954                         | B3                | TFGMS469                              | 54.9                              | 150                            | 1                                                          | M                                                     | NSA                                                                                                            |
| PUID16585443   | Ca1         | 12131386                | (CATGG)3                     | 15                                | TTGAAGAGGTTGAGAATGGTA            | CCATGCATGTGATTTCAGTAT            | 189-1130          | 891-995                         | GATA              | TFGMS470                              | 55.0                              | 150                            | 1                                                          | M                                                     | NSA                                                                                                            |
| PUID16585444   | Ca4         | 10978720                | (ATC)4                       | 12                                | ATGACCAAGTGAATATGTGCTC           | ACAATGATGTTTTCTGTGATG            | 214-1401          | 991-1092                        | WD40              | TFGMS471                              | 55.1                              | 143                            | 1                                                          | M                                                     | NSA                                                                                                            |
| PUID16585445   | Ca5         | 166287                  | (GGA)6                       | 18                                | TGACAACAGTCTTGGTCTTT             | GGGAGAGGGAGTAACAAAGTA            | 23-1294           | 194-571                         | NAM               | TFGMS472                              | 54.9                              | 154                            | 1                                                          | M                                                     | NSA                                                                                                            |
| PUID16585446   | Ca8         | 8740817                 | (AC)6                        | 12                                | ACAAATAACCATCACTCCAA             | CTTGATGTGAACAAGAAACT             | 98-814            | 365-580                         | PLATZ             | TFGMS473                              | 54.7                              | 137                            | 1                                                          | M                                                     | NSA                                                                                                            |
| PUID16585447   | Ca8         | 8740776                 | (TGA)5                       | 15                                | ATTGAAAACCAAGAGACCAC             | GCACCTGTTATCATCATCATC            | 98-814            | 365-580                         | PLATZ             | TFGMS474                              | 55.4                              | 147                            | 1                                                          | M                                                     | NSA                                                                                                            |
| PUID16585448   | Ca6         | 7956690                 | (AAGA)5                      | 20                                | TTCTTCTATGAAATGGGTCTAA           | GAAATTTGGATTGAACAGGT             | 350-1219          | 752-847                         | AP2               | TFGMS475                              | 54.9                              | 140                            | 1                                                          | M                                                     | NSA                                                                                                            |
| PUID16585449   | Ca5         | 44475116                | (GATGC)3                     | 15                                | GAAGACACCTCATGGTGATA             | CGAAAGATAACCAACACATC             | 350-1004          | 468-722                         | BTB               | TFGMS476                              | 55.1                              | 136                            | 1                                                          | M                                                     | NSA                                                                                                            |
| PUID16585450   | Ca5         | 44475116                | (TCG)5                       | 15                                | GAAGACACCTCATGGTGATA             | CGAAAGATAACCAACACATC             | 350-1004          | 468-722                         | BTB               | TFGMS477                              | 55.1                              | 136                            | 1                                                          | M                                                     | NSA                                                                                                            |
| PUID16585451   | Ca5         | 44128202                | (GAAA)3                      | 18                                | TAGTAGAATGCGTTCAAGTTT            | GAAGACCAACAAGCTTAGAC             | 175-1149          | 616-933                         | BTB               | TFGMS478                              | 55.3                              | 151                            | 1                                                          | M                                                     | NSA                                                                                                            |
| PUID16585452   | Ca5         | 12081922                | (CAA)4                       | 12                                | TACTCAATCACTCCGGAAGT             | AATTTCTGCTGTTGGATATC             | 163-1050          | 181-375                         | CBFD-NFYB         | TFGMS479                              | 54.8                              | 142                            | 1                                                          | M                                                     | NSA                                                                                                            |
| PUID16585453   | Ca1         | 7441737                 | (ACA)4                       | 12                                | AGAACACACAGCAAGCTGCT             | AATTGATGTGTTGTGTGGTT             | 258-878           | 588-758                         | CBFD-NFYB         | TFGMS480                              | 55.0                              | 148                            | 1                                                          | M                                                     | NSA                                                                                                            |
| PUID16585454   | Ca1         | 7441625                 | (CTCTT)4                     | 20                                | CAACAGTTTCCCTTCACTTC             | AGAACAAGCTCTGCGGAAGT             | 258-878           | 588-758                         | CBFD-NFYB         | TFGMS481                              | 54.8                              | 153                            | 1                                                          | M                                                     | NSA                                                                                                            |
| PUID16585455   | 0           | 0                       | (AGT)5                       | 15                                | TACAATCACCCATGCAACT              | TTGGAGCTTTGTAAACATTAGG           | 667-1458          | 769-867                         | B3                | TFGMS482                              | 54.9                              | 157                            | 1                                                          | M                                                     | NSA                                                                                                            |
| PUID16585456   | 0           | 0                       | (ATT)4                       | 12                                | CCTAATGTTACAAAGCTCCAA            | ATATTTTGAACCTCCCTGGAT            | 667-1458          | 769-867                         | B3                | TFGMS483                              | 54.8                              | 150                            | 1                                                          | M                                                     | NSA                                                                                                            |
| PUID16585457   | Ca7         | 32382865                | (ACA)4                       | 12                                | AACACAACAAGAAATCAACTG            | TGTTCTGGATTTCGTTCTA              | 299-1066          | 632-1039                        | DUF3594           | TFGMS484                              | 55.2                              | 155                            | 1                                                          | M                                                     | NSA                                                                                                            |
| PUID16585458   | Ca7         | 32386407                | (TC)7                        | 14                                | ATAAAATTGAAAGCGAGTGCT            | AAACACAAGTCTGATTTCCTCA           | 299-1066          | 632-1039                        | DUF3594           | TFGMS485                              | 55.5                              | 139                            | 1                                                          | M                                                     | NSA                                                                                                            |
| PUID16585459   | Ca5         | 24717508                | (AAT)6                       | 18                                | AATCAAGAGATCCACTTCAACC           | TGTTCATGTGCATGATTATGG            | 567-1598          | 720-851                         | Myb DNA binding   | TFGMS486                              | 55.7                              | 150                            | 1                                                          | M                                                     | NSA                                                                                                            |
| PUID16585460   | Ca1         | 43957682                | (AAT)4                       | 12                                | ACCAACCCAACTTCTCAATAT            | CAGAACTCCTTCTCCTAAGC             | 76-1020           | 106-480                         | NAM               | TFGMS487                              | 55.1                              | 153                            | 1                                                          | M                                                     | NSA                                                                                                            |
| PUID16585461   | Ca1         | 43957788                | (TAA)5                       | 15                                | GCTTAGACCCCTTATCATGTG            | CAAAACAGCTTTCAACACTTT            | 76-1020           | 106-480                         | NAM               | TFGMS488                              | 54.1                              | 150                            | 1                                                          | M                                                     | NSA                                                                                                            |
| PUID16585462   | Ca5         | 45765485                | (GCTCG)3                     | 15                                | GCAACAGTTCCTCAATGGTTAG           | CATCATTTTGAGTTTGGACAT            | 150-866           | 291-440                         | HomeoBox          | TFGMS489                              | 55.1                              | 152                            | 1                                                          | M                                                     | NSA                                                                                                            |
| PUID16585463   | Ca3         | 29764445                | (AGC)4                       | 12                                | AAGGATCGTTGTGACCTTTAT            | GCTCAAAATTCAAAACACCTA            | 184-1095          | 256-393                         | HLH               | TFGMS490                              | 55.3                              | 138                            | 1                                                          | M                                                     | NSA                                                                                                            |
| PUID16585464   | Ca5         | 10157517                | (ATGAA)3                     | 18                                | ATTTGTGAATGCAAGAGAGTG            | GTCATTGATTTCAGCAGTTGG            | 62-1003           | 776-979                         | HMG-Box           | TFGMS491                              | 55.5                              | 151                            | 1                                                          | M                                                     | NSA                                                                                                            |
| PUID16585465   | Ca4         | 45595098                | (AGT)4                       | 12                                | AAAGTAAAGAGTGTGGAAGC             | GTTTCAAACCTGCAAAAAGTC            | 126-2153          | 1350-1484                       | WRC               | TFGMS492                              | 55.3                              | 150                            | 1                                                          | M                                                     | NSA                                                                                                            |
| PUID16585466   | Ca4         | 45593163                | (ATC)5                       | 15                                | CTAAGCATTTGTTGTTGGTGT            | ACCACCAATCCGACTACTACT            | 126-2153          | 1350-1484                       | WRC               | TFGMS493                              | 55.4                              | 154                            | 1                                                          | M                                                     | NSA                                                                                                            |

| NCBI Probe IDs | Chromosomes | Physical positions (bp) | Microsatellite repeat-motifs | Microsatellite repeat length (bp) | Forward Primer sequences (5'-3') | Reverse Primer sequences (5'-3') | ORF position (bp) | Functional domain position (bp) | Functional domain | Types of genic microsatellite markers | Actual annealing temperature (°C) | Size (bp) of alleles amplified | Total number of alleles amplified among chickpea varieties | Polymorphic potential monomorphic (M)/polymorphic (P) | R2 value of marker loci showing significant association ( $P \leq 0.05$ ) with three major seed and pod traits |
|----------------|-------------|-------------------------|------------------------------|-----------------------------------|----------------------------------|----------------------------------|-------------------|---------------------------------|-------------------|---------------------------------------|-----------------------------------|--------------------------------|------------------------------------------------------------|-------------------------------------------------------|----------------------------------------------------------------------------------------------------------------|
| PUIID16585467  | Ca4         | 12176311                | (AAC)4                       | 12                                | CAGATCCATCACACTTCAATC            | CCTGTTGGAAATTTCTAGGTT            | 107-2095          | 992-2092                        | GRAS              | TFGMS494                              | 55.5                              | 154                            | 1                                                          | M                                                     | NSA                                                                                                            |
| PUIID16585468  | Ca6         | 13246141                | (TTGGG)3                     | 15                                | AGATTGGATGCTCAATCTTTCAT          | TGCTGAGTCTGCAATCTGGAAT           | 178-2199          | 358-429                         | ZiCCCH            | TFGMS495                              | 55.2                              | 149                            | 1                                                          | M                                                     | NSA                                                                                                            |
| PUIID16585469  | Ca6         | 38815940                | (CAA)4                       | 12                                | GTTGTGATCAACATCATCTGCC           | GGAACAAAGAAAGAAAGGATTC           | 243-2444          | 1365-2438                       | GRAS              | TFGMS496                              | 55.3                              | 153                            | 1                                                          | M                                                     | NSA                                                                                                            |
| PUIID16585470  | Ca8         | 2979232                 | (AAAAT)3                     | 15                                | AGTTGGGACCATTTATTTTTC            | CGTGTGTCGAGTTGTCGAGC             | 209-1852          | 266-589                         | Response-reg      | TFGMS497                              | 54.9                              | 154                            | 1                                                          | M                                                     | NSA                                                                                                            |
| PUIID16585471  | Ca4         | 48319757                | (AAC)4                       | 12                                | TTCCCATTCAGTCATTTAATC            | CTTTGCTCAATTTATTTGAGT            | 189-1841          | 504-692                         | bZIP              | TFGMS498                              | 54.2                              | 146                            | 1                                                          | M                                                     | NSA                                                                                                            |
| PUIID16585472  | Ca4         | 48319757                | (AATC)3                      | 12                                | TTCCCATTCAGTCATTTAATC            | CAAGTCTTTGTCATCTTTGCT            | 189-1841          | 504-692                         | bZIP              | TFGMS499                              | 54.2                              | 146                            | 1                                                          | M                                                     | NSA                                                                                                            |
| PUIID16585473  | Ca4         | 48319757                | (ACT)4                       | 12                                | TTCCCATTCAGTCATTTAATC            | CTTTGCTCAATTTATTTGAGT            | 189-1841          | 504-692                         | bZIP              | TFGMS500                              | 54.2                              | 146                            | 1                                                          | M                                                     | NSA                                                                                                            |
| PUIID16585474  | Ca4         | 48319615                | (TAA)5                       | 20                                | AAAGCATGCATTAACACAGT             | CTTTGCTCAATTTATTTGAGT            | 189-1841          | 504-692                         | bZIP              | TFGMS501                              | 55.1                              | 139                            | 1                                                          | M                                                     | NSA                                                                                                            |
| PUIID16585475  | Ca5         | 16679503                | (ATTTC)3                     | 18                                | CCTAAATTCCTTTCATTTTCA            | CGAGATCTGTTTGAGAAAGAG            | 280-2460          | 652-747                         | ANK               | TFGMS502                              | 53.8                              | 147                            | 1                                                          | M                                                     | NSA                                                                                                            |
| PUIID16585476  | Ca5         | 16679458                | (TC)9                        | 18                                | TTTCAATTTGGAAGACGTTAC            | CTGATCAATCTGAATGGAGAAA           | 280-2460          | 652-747                         | ANK               | TFGMS503                              | 54.7                              | 146                            | 1                                                          | M                                                     | NSA                                                                                                            |
| PUIID16585477  | Ca3         | 37101948                | (AATTG)4                     | 24                                | GGAACAACCTCAAGCTCAGTAA           | AAAGTGATACACCGAAGCAAT            | 407-3094          | 818-1051                        | SBP               | TFGMS504                              | 54.8                              | 164                            | 1                                                          | M                                                     | NSA                                                                                                            |
| PUIID16585478  | Ca3         | 37102110                | (CT)5                        | 15                                | TTACTGCGACGTTCTCAAGC             | ATCCTTAGATCAGAGGAAACCA           | 407-3094          | 818-1051                        | SBP               | TFGMS505                              | 55.8                              | 150                            | 1                                                          | M                                                     | NSA                                                                                                            |
| PUIID16585479  | Ca1         | 4385831                 | (CAG)4                       | 12                                | TGATTGCAGGAAGTTCATTAT            | AAGAAGATGAAGAGGAGTTGG            | 410-3625          | 1793-2035                       | Helicase          | TFGMS506                              | 54.9                              | 159                            | 1                                                          | M                                                     | NSA                                                                                                            |
| PUIID16585480  | Ca6         | 17262215                | (AAT)4                       | 12                                | CAGATTTTCGGTCTATCAATG            | CCAACAAGAGCTGAGCTTTTA            | 380-5683          | 515-685                         | HomeoBox          | TFGMS507                              | 54.9                              | 151                            | 1                                                          | M                                                     | NSA                                                                                                            |
| PUIID16585481  | Ca7         | 39769444                | (ATTTC)3                     | 18                                | TTCTTCCCAATTTCAATTTAC            | CTTTGGTTGAATCGCAATGGA            | 324-2393          | 609-704                         | ANK               | TFGMS508                              | 52.0                              | 172                            | 1                                                          | M                                                     | NSA                                                                                                            |
| PUIID16585482  | Ca7         | 39769443                | (TCT)6                       | 18                                | TTCTTCCCAATTTCAATTTACA           | AACAATGAGATCTGGACATCT            | 324-2393          | 609-704                         | ANK               | TFGMS509                              | 53.3                              | 140                            | 1                                                          | M                                                     | NSA                                                                                                            |
| PUIID16585483  | Ca5         | 44152835                | (ATCC)3                      | 12                                | ACATCCATCACACATCACAC             | AGAGAGAGCAAAATGAGGGAAA           | 238-2583          | 1420-1548                       | Myb DNA binding   | TFGMS510                              | 54.7                              | 151                            | 1                                                          | M                                                     | NSA                                                                                                            |
| PUIID16585484  | 0           | 0                       | (AG)10                       | 20                                | CAGAAAGAAAAATACGAGCTG            | CAGAACCAGTTCTCATGTAA             | 333-1382          | 624-701                         | ZiCCCH            | TFGMS511                              | 54.7                              | 136                            | 1                                                          | M                                                     | NSA                                                                                                            |
| PUIID16585485  | Ca4         | 7970786                 | (TGG)8                       | 24                                | ATCCGGTAAATCAACATGAAT            | CTTTGAGTATTGCGTGTGTTG            | 333-1382          | 624-701                         | ZiCCCH            | TFGMS512                              | 55.9                              | 157                            | 1                                                          | M                                                     | NSA                                                                                                            |
| PUIID16585486  | Ca5         | 29397576                | (AAG)4                       | 12                                | TATTTTCCCCCTTCTGTAAC             | CCAAGAACGACAAAGAAAGAA            | 481-1458          | 892-987                         | AP2               | TFGMS513                              | 55.0                              | 143                            | 1                                                          | M                                                     | NSA                                                                                                            |
| PUIID16585487  | Ca5         | 29398059                | (CT)5                        | 15                                | AGTCTTCCCAAAATTCACAC             | CCAAGAACGACAAAGAAAGAA            | 481-1458          | 892-987                         | AP2               | TFGMS514                              | 55.8                              | 152                            | 1                                                          | M                                                     | NSA                                                                                                            |
| PUIID16585488  | Ca5         | 29399148                | (TAT)5                       | 15                                | TTAGTTTCCACAGCTGATTTTT           | GCTCTGTAATCTTAAATTTAGC           | 481-1458          | 892-987                         | AP2               | TFGMS515                              | 54.4                              | 166                            | 1                                                          | M                                                     | NSA                                                                                                            |
| PUIID16585489  | Ca5         | 29397838                | (TTTTA)3                     | 15                                | GGATCGAAAGGATTTGCTATT            | TTGTGTGTTGTTGAAAAATCC            | 481-1458          | 892-987                         | AP2               | TFGMS516                              | 54.9                              | 164                            | 1                                                          | M                                                     | NSA                                                                                                            |
| PUIID16585490  | Ca6         | 18445177                | (AAATA)3                     | 15                                | TGAAGTTGCAAAACTTAAGGA            | TAATCTACACGGACGCTGTAA            | 288-1445          | 1218-1340                       | bZIP              | TFGMS517                              | 55.4                              | 146                            | 1                                                          | M                                                     | NSA                                                                                                            |
| PUIID16585491  | Ca2         | 32544871                | (TTT)6                       | 18                                | TCCTTTTCCCTTCTCTCAAC             | CCGATTAAGATGATACCAACAG           | 216-1943          | 780-821                         | ZiCCCH            | TFGMS518                              | 55.3                              | 136                            | 1                                                          | M                                                     | NSA                                                                                                            |
| PUIID16585492  | Ca4         | 11573408                | (ACC)5                       | 15                                | ACTATTATGCACCCACTGAAG            | TCAGAGAAGATCGAGAGT               | 290-2170          | 578-832                         | Myb DNA binding   | TFGMS519                              | 54.5                              | 138                            | 1                                                          | M                                                     | NSA                                                                                                            |
| PUIID16585493  | Ca4         | 11573184                | (CCA)4                       | 12                                | TTTCCCTCTTCAAAATTAAC             | GCAGAGACGAAGAAGATGATA            | 290-2170          | 578-832                         | Myb DNA binding   | TFGMS520                              | 55.2                              | 146                            | 1                                                          | M                                                     | NSA                                                                                                            |
| PUIID16585494  | Ca8         | 3456989                 | (TCT)5                       | 15                                | GTAATCCGCTAATGGCTCACT            | AGTGAGCCATTAGGAGTTTAC            | 189-2045          | 1670-1904                       | Acetyltransf      | TFGMS521                              | 55.0                              | 149                            | 1                                                          | M                                                     | NSA                                                                                                            |
| PUIID16585495  | Ca1         | 10893797                | (AATAA)4                     | 20                                | CCTTTTGGGTTCTTATGATT             | ATTACACGAAGGATGAATTTG            | 196-1995          | 307-1269                        | EiN3              | TFGMS522                              | 55.0                              | 151                            | 1                                                          | M                                                     | NSA                                                                                                            |
| PUIID16585496  | Ca3         | 33153988                | (ATTTA)3                     | 15                                | CTCACGCAATGCTAATATCT             | GGAGAAACATAGTGGCTTCAA            | 177-1844          | 1131-1325                       | Sigma70           | TFGMS523                              | 55.6                              | 162                            | 1                                                          | M                                                     | NSA                                                                                                            |
| PUIID16585497  | Ca6         | 7098590                 | (TTTGA)3                     | 15                                | TGTATAAGCATCTCAGTTGCT            | TGCGAAAGTACTTCAACCAAT            | 452-1480          | 473-873                         | NAM               | TFGMS524                              | 55.1                              | 151                            | 1                                                          | M                                                     | NSA                                                                                                            |
| PUIID16585498  | Ca3         | 38103222                | (GTTGTG)3                    | 18                                | TTCAAGTATCTACGATACGTC            | GAATCGTTTACTCCCTTTTC             | 156-596           | 297-518                         | Histone           | TFGMS525                              | 54.9                              | 168                            | 1                                                          | M                                                     | NSA                                                                                                            |
| PUIID16585499  | 0           | 0                       | (CAGAA)3                     | 18                                | AGATTGGTCAAAACTAGGGTTC           | CCAGAGACAAAGACAAAGAA             | 117-1022          | 260-474                         | TCP               | TFGMS526                              | 54.9                              | 149                            | 1                                                          | M                                                     | NSA                                                                                                            |
| PUIID16585500  | 0           | 0                       | (TAA)6                       | 18                                | CAATCATCATCTGCTCAATTCT           | TTCTTCCTCTTCCTTCAACTT            | 117-1022          | 260-474                         | TCP               | TFGMS527                              | 55.3                              | 149                            | 1                                                          | M                                                     | NSA                                                                                                            |
| PUIID16585501  | Ca3         | 31369872                | (ATTGTT)3                    | 18                                | ATAGACATAGGCAATGGTTTG            | ACGCGATTAAGATTTGAGGT             | 111-677           | 573-668                         | NAM               | TFGMS528                              | 54.5                              | 141                            | 1                                                          | M                                                     | NSA                                                                                                            |
| PUIID16585502  | Ca1         | 2602547                 | (TCT)5                       | 15                                | CAACATGGTAAACATGTACCT            | GGGTGAGGAAAAGAAATCTA             | 283-720           | 310-546                         | SBP               | TFGMS529                              | 55.0                              | 165                            | 1                                                          | M                                                     | NSA                                                                                                            |
| PUIID16585503  | Ca6         | 54244146                | (CTCACT)3                    | 18                                | CCTTCTGCTGCTCTTCTTAT             | GAGAAGAGAAAATCCCTTTTG            | 230-682           | 236-298                         | Myb               | TFGMS530                              | 55.7                              | 149                            | 1                                                          | M                                                     | NSA                                                                                                            |
| PUIID16585504  | Ca3         | 27639237                | (CAG)4                       | 12                                | TGAGGATAATGCTATTTTCAGG           | GCCAGTCATAAAAACAGTAAA            | 192-1121          | 906-998                         | bZIP              | TFGMS531                              | 54.6                              | 154                            | 1                                                          | M                                                     | NSA                                                                                                            |
| PUIID16585505  | Ca4         | 16650296                | (ACTTGC)4                    | 24                                | TGAACTCGATCTCTCGCTTC             | ATCATGCTTCACAACCTCATCA           | 1-309             | 95-844                          | ovate             | TFGMS532                              | 54.8                              | 172                            | 1                                                          | M                                                     | NSA                                                                                                            |
| PUIID16585506  | Ca1         | 3651073                 | (ATG)6                       | 18                                | GACAAGACCAATGTCACTTC             | CAGAAAGCGTTTCAATAATTGA           | 239-787           | 413-607                         | K-Box             | TFGMS533                              | 54.6                              | 163                            | 1                                                          | M                                                     | NSA                                                                                                            |
| PUIID16585507  | Ca1         | 3650780                 | (CAG)4                       | 12                                | TAACAACCAACTCTTGAGAGC            | GGGAATACTACAACCCCTTC             | 239-787           | 413-607                         | K-Box             | TFGMS534                              | 54.8                              | 151                            | 1                                                          | M                                                     | NSA                                                                                                            |
| PUIID16585508  | Ca1         | 15966248                | (AAAAA)3                     | 18                                | ATCTCTTTTCTCCCCACTAAA            | CATCAAAGCGTAATCAAAAAG            | 170-856           | 377-526                         | HLH               | TFGMS535                              | 54.7                              | 195                            | 1                                                          | M                                                     | NSA                                                                                                            |
| PUIID16585509  | Ca2         | 23025109                | (AGAA)3                      | 12                                | GCACACCACTTCTAATCACTA            | ATCACACACACTGAAAGCTC             | 73-732            | 301-576                         | K-Box             | TFGMS536                              | 55.3                              | 158                            | 1                                                          | M                                                     | NSA                                                                                                            |
| PUIID16585510  | Ca7         | 33300264                | (TTTCT)3                     | 15                                | GTTCCCTCCTCGAACTACTAC            | CCCTAGAGAAAACCAAGTCAT            | 233-934           | 536-640                         | Tify              | TFGMS537                              | 54.5                              | 155                            | 1                                                          | M                                                     | NSA                                                                                                            |
| PUIID16585511  | Ca1         | 41981704                | (ATG)4                       | 12                                | AAGTACCACATTTTGATAAACG           | ATATTTACAAAGCGTGTCTGCT           | 98-703            | 161-259                         | AP2               | TFGMS538                              | 53.7                              | 139                            | 1                                                          | M                                                     | NSA                                                                                                            |
| PUIID16585512  | Ca6         | 4566075                 | (TTC)5                       | 15                                | ACAACCTTACTGTGTTGGAAA            | ATTTCAATCCTTCTGTGAAAC            | 397-912           | 421-636                         | PC4               | TFGMS539                              | 55.0                              | 147                            | 1                                                          | M                                                     | NSA                                                                                                            |
| PUIID16585513  | Ca6         | 24448166                | (ACT)4                       | 12                                | CTTTTGAACAGAGGAATTGAC            | TGTTGTTGATGAAGGAATTGT            | 183-1043          | 381-518                         | Myb DNA binding   | TFGMS540                              | 54.1                              | 150                            | 1                                                          | M                                                     | NSA                                                                                                            |
| PUIID16585514  | Ca6         | 24448036                | (ACT)6                       | 18                                | CAATTCTCTCATCAACAACAC            | TGATCTTCCCATCTTATTTCA            | 183-1043          | 381-518                         | Myb DNA binding   | TFGMS541                              | 55.6                              | 154                            | 1                                                          | M                                                     | NSA                                                                                                            |
| PUIID16585515  | Ca6         | 24448166                | (ATCTC)3                     | 18                                | CTTTTGAACAGAGGAATTGAC            | TGGTAAATCTCCAGCTATCAAC           | 183-1043          | 381-518                         | Myb DNA binding   | TFGMS542                              | 54.1                              | 150                            | 1                                                          | M                                                     | NSA                                                                                                            |
| PUIID16585516  | Ca5         | 42499312                | (AG)6                        | 12                                | ATGGTTTTGCTGCACATCTTCA           | AACTCACACAGCACTGCTT              | 220-951           | 496-747                         | K-Box             | TFGMS543                              | 55.0                              | 151                            | 1                                                          | M                                                     | NSA                                                                                                            |
| PUIID16585517  | Ca5         | 42504567                | (ATGTA)3                     | 15                                | GGTATGAAGCATGCATAAAGA            | TCTCAATTCTCTTCAATTCCA            | 220-951           | 496-747                         | K-Box             | TFGMS544                              | 55.5                              | 160                            | 1                                                          | M                                                     | NSA                                                                                                            |
| PUIID16585518  | Ca2         | 14595057                | (CTTG)4                      | 16                                | CCAACAACAACACTTCAACAG            | TGAACCTAGAATTTGGATGAT            | 260-958           | 482-652                         | CBFD-NFYB         | TFGMS545                              | 55.7                              | 162                            | 1                                                          | M                                                     | NSA                                                                                                            |
| PUIID16585519  | Ca8         | 4876424                 | (CAT)4                       | 12                                | ATGCCATTGAAGTAATGTGTC            | AGTCGACCCAAAGTAAGTCTC            | 155-808           | 482-631                         | HomeoBox          | TFGMS546                              | 55.1                              | 150                            | 1                                                          | M                                                     | NSA                                                                                                            |
| PUIID16585520  | Ca6         | 27827123                | (TCA)5                       | 15                                | CATGACAGTGGTGAGAAAAGT            | GATTTTTCGATGTCTCTTTCC            | 31-612            | 313-522                         | Histone           | TFGMS547                              | 55.2                              | 147                            | 1                                                          | M                                                     | NSA                                                                                                            |
| PUIID16585521  | Ca8         | 2014051                 | (CCTCAA)3                    | 18                                | CTACCGTGTGTTTCTTCATAA            | GCCTTCACCTTGCTGTATTATG           | 205-1065          | 886-1005                        | HomeoBox          | TFGMS548                              | 54.9                              | 176                            | 1                                                          | M                                                     | NSA                                                                                                            |
| PUIID16585522  | Ca1         | 15606739                | (CAC)4                       | 12                                | GCAGCTCAACGATTCTCTT              | GATTCATCTTCTCCCTCAT              | 203-1003          | 425-598                         | WRKY              | TFGMS549                              | 55.5                              | 142                            | 1                                                          | M                                                     | NSA                                                                                                            |
| PUIID16585523  | Ca3         | 81453                   | (AATG)3                      | 12                                | CATCCCTGTTTATTATCAACA            | CCAGCAAGTAAGAAAGCTCAA            | 203-922           | 506-886                         | NAM               | TFGMS550                              | 54.5                              | 151                            | 1                                                          | M                                                     | NSA                                                                                                            |
| PUIID16585524  | Ca3         | 81453                   | (ACTC)3                      | 12                                | CATCCCTGTTTATTATCAACA            | CTAAAATGGAGGAGGAAGAG             | 203-922           | 506-886                         | NAM               | TFGMS551                              | 54.5                              | 151                            | 1                                                          | M                                                     | NSA                                                                                                            |
| PUIID16585525  | Ca2         | 31677179                | (GAA)6                       | 18                                | AAGAGTGAAGTGTGGTTTCTCT           | CCAAATGTGTCGTTTATTCT             | 203-922           | 506-886                         | NAM               | TFGMS552                              | 55.5                              | 148                            | 1                                                          | M                                                     | NSA                                                                                                            |
| PUIID16585526  | Ca3         | 80260                   | (TGTCA)4                     | 24                                | AATGAGCTACTGCTGTCTTCA            | AAGGAAACCACACTCACTCT             | 203-922           | 506-886                         | NAM               | TFGMS553                              | 55.4                              | 157                            | 1                                                          | M                                                     | NSA                                                                                                            |
| PUIID16585527  | Ca3         | 80320                   | (TTTGA)4                     | 24                                | ATTCCACTGTTGCTGATAAA             | TAAAAGCGAAGGGTTGAGTAT            | 203-922           | 506-886                         | NAM               | TFGMS554                              | 55.0                              | 151                            | 1                                                          | M                                                     | NSA                                                                                                            |
| PUIID16585528  | 0           | 0                       | (TGT)5                       | 15                                | TCTTCATCGCTATCTTCAAC             | AAGAGCCACAGAGAGTAAACC            | 453-803           | 129-320                         | bZIP              | TFGMS555                              | 54.8                              | 162                            | 1                                                          | M                                                     | NSA                                                                                                            |

| NCBI Probe IDs | Chromosomes | Physical positions (bp) | Microsatellite repeat-motifs | Microsatellite repeat length (bp) | Forward Primer sequences (5'-3') | Reverse Primer sequences (5'-3') | ORF position (bp) | Functional domain position (bp) | Functional domain               | Types of genic microsatellite markers | Actual annealing temperature (°C) | Size (bp) of alleles amplified | Total number of alleles amplified among chickpea varieties | Polymorphic potential monomorphic (M)/polymorphic (P) | R2 value of marker loci showing significant association (P ≤ 0.05) with three major seed and pod traits |
|----------------|-------------|-------------------------|------------------------------|-----------------------------------|----------------------------------|----------------------------------|-------------------|---------------------------------|---------------------------------|---------------------------------------|-----------------------------------|--------------------------------|------------------------------------------------------------|-------------------------------------------------------|---------------------------------------------------------------------------------------------------------|
| PUID16585529   | Ca4         | 41989223                | (AG)6                        | 12                                | TTTTTCTTCTCACTTCGATG             | TAGAAACGAAAGCTGAAAGC             | 343-747           | 439-651                         | Histone                         | TFGMS556                              | 55.2                              | 127                            | 1                                                          | M                                                     | NSA                                                                                                     |
| PUID16585530   | Ca3         | 9395043                 | (TTG)5                       | 15                                | CTAGCTTGGTGGATGATGA              | CAACAAGTGGTGTGTGTTCT             | 4-606             | 370-468                         | AP2                             | TFGMS557                              | 54.5                              | 156                            | 1                                                          | M                                                     | NSA                                                                                                     |
| PUID16585531   | Ca5         | 28183450                | (ATA)11                      | 33                                | TTGAGCACAAGTTTCCTCT              | TCCTCTCAATAGGTAAATTGC            | 304-786           | 502-609                         | ACT                             | TFGMS558                              | 55.2                              | 151                            | 1                                                          | M                                                     | NSA                                                                                                     |
| PUID16585532   | Ca5         | 19048743                | (CAC)4                       | 12                                | CTTATGAGATGAGGAAGCAAC            | ATTTCTCTCACAAATCAATGG            | 149-715           | 290-535                         | Acetyltransf                    | TFGMS559                              | 55.0                              | 150                            | 1                                                          | M                                                     | NSA                                                                                                     |
| PUID16585533   | 0           | 0                       | (ATC)4                       | 12                                | TCATCATGATCTTCAATTTC             | AAAGTCCAAAGGTCAATCTC             | 158-1443          | 203-589                         | NAM                             | TFGMS560                              | 55.0                              | 148                            | 1                                                          | M                                                     | NSA                                                                                                     |
| PUID16585534   | 0           | 0                       | (CAT)4                       | 12                                | TAATGGGTACCATGCAATTAT            | GAAGCAACAAGTCTATCCAAA            | 158-1443          | 203-589                         | NAM                             | TFGMS561                              | 54.6                              | 150                            | 1                                                          | M                                                     | NSA                                                                                                     |
| PUID16585535   | Ca4         | 7121052                 | (AGT)5                       | 15                                | GTGGTGCAACGATAGTAACTC            | CAAAAAGCTGTGAAAATAGC             | 231-683           | 534-644                         | WRKY                            | TFGMS562                              | 54.9                              | 156                            | 1                                                          | M                                                     | NSA                                                                                                     |
| PUID16585536   | Ca6         | 53652536                | (CAA)7                       | 21                                | TCAACTGTTCAACAACATCCT            | GAGGAGGAGCACAAGAACTAT            | 60-1295           | 1095-1232                       | HLH                             | TFGMS563                              | 55.6                              | 163                            | 1                                                          | M                                                     | NSA                                                                                                     |
| PUID16585537   | 0           | 0                       | (TGG)5                       | 15                                | ATAGCACTGGACGTCTCTTG             | ACTCCTTCAACTCAAAACACA            | 735-1502          | 843-1256                        | whirly                          | TFGMS564                              | 54.8                              | 148                            | 1                                                          | M                                                     | NSA                                                                                                     |
| PUID16585538   | Ca5         | 10990120                | (TGA)6                       | 18                                | CTTTATCATGTTCAACAGAGG            | TAATCTCTTCTTCCACCCCTTT           | 1234-2835         | 2269-2577                       | FAR1                            | TFGMS565                              | 54.8                              | 156                            | 1                                                          | M                                                     | NSA                                                                                                     |
| PUID16585539   | Ca8         | 502255                  | (CAAG)3                      | 12                                | AAATTCTTAAACAGCAGGAT             | ACTAGCTGAACGTGCCTTCTC            | 77-1834           | 692-919                         | FHA                             | TFGMS566                              | 54.8                              | 149                            | 1                                                          | M                                                     | NSA                                                                                                     |
| PUID16585540   | Ca1         | 13755937                | (AGAA)3                      | 12                                | AAATTGAACCTGAACAACGTA            | ATCCTTACATTCTCACTGCTGT           | 2791-6567         | 5737-6108                       | SET                             | TFGMS567                              | 54.9                              | 148                            | 1                                                          | M                                                     | NSA                                                                                                     |
| PUID16585541   | Ca1         | 13754931                | (TCT)5                       | 15                                | TACGCTTTATCTCCGATCTA             | TCGAGATTAGAAAACCTAGC             | 2791-6567         | 5737-6108                       | SET                             | TFGMS568                              | 54.6                              | 149                            | 1                                                          | M                                                     | NSA                                                                                                     |
| PUID16585542   | Ca4         | 36799412                | (AGGG)3                      | 12                                | AGGGATAGGGTTAGGGATAGT            | CCCTATGCCCTACTATGCCCTAA          | 118-948           | 154-234                         | ZiCCCH                          | TFGMS569                              | 54.9                              | 145                            | 1                                                          | M                                                     | NSA                                                                                                     |
| PUID16585543   | Ca4         | 36800180                | (ATCCG)3                     | 15                                | ACAAACAAATAGACCTCCACA            | GCCGATCTTAAAGTAGCAATGC           | 118-948           | 154-234                         | ZiCCCH                          | TFGMS570                              | 54.7                              | 152                            | 1                                                          | M                                                     | NSA                                                                                                     |
| PUID16585544   | Ca4         | 36799529                | (GATAGG)3                    | 18                                | AGTCGGAGCAGGAGTAATAGT            | CAAGAAACATCAGACGTCTCT            | 118-948           | 154-234                         | ZiCCCH                          | TFGMS571                              | 54.9                              | 148                            | 1                                                          | M                                                     | NSA                                                                                                     |
| PUID16585545   | Ca7         | 37049869                | (CAG)5                       | 15                                | CTGAACCAATTGAAGTTGAAG            | AAGAAAACCTAGCTCCAAA              | 148-780           | 457-627                         | LIM                             | TFGMS572                              | 55.0                              | 155                            | 1                                                          | M                                                     | NSA                                                                                                     |
| PUID16585546   | Ca5         | 7675124                 | (ATT)3                       | 12                                | CTCGTAATTTCTCAATCCAA             | GGGCTAATGAGCATTAAAGA             | 64-759            | 283-576                         | K-Box                           | TFGMS573                              | 54.7                              | 158                            | 1                                                          | M                                                     | NSA                                                                                                     |
| PUID16585547   | 0           | 0                       | (AG)8                        | 16                                | GAAAGTTGTGAAGGAGTTGAA            | TCCTCTCTCTCTCTCTCTCTCA           | 484-1650          | 1392-1536                       | Myb DNA binding                 | TFGMS574                              | 54.6                              | 146                            | 1                                                          | M                                                     | NSA                                                                                                     |
| PUID16585548   | Ca6         | 17342710                | (AAC)4                       | 12                                | TTCCACTCTCAACTAAATAGG            | ATCTTTGATGGGAAGAGTGT             | 38-454            | 134-337                         | FHA                             | TFGMS575                              | 54.6                              | 161                            | 1                                                          | M                                                     | NSA                                                                                                     |
| PUID16585549   | Ca7         | 32855092                | (TGT)5                       | 15                                | TGAAGTGGTTCTGAGTTGTT             | TACTGTGAAGACACATGCGAC            | 125-1216          | 854-1030                        | WRC                             | TFGMS576                              | 54.9                              | 151                            | 1                                                          | M                                                     | NSA                                                                                                     |
| PUID16585550   | Ca8         | 3998720                 | (AAAT)3                      | 12                                | AATGCCAAATTTCTCTCTGT             | TTGATGCTCTTCAAGTCACTC            | 308-811           | 605-754                         | AP2                             | TFGMS577                              | 54.1                              | 151                            | 1                                                          | M                                                     | NSA                                                                                                     |
| PUID16585551   | Ca8         | 3998446                 | (ATG)4                       | 12                                | CAGGAATCTGTTCAGTCAA              | ACATAACAACAACCCCTTCA             | 308-811           | 605-754                         | AP2                             | TFGMS578                              | 55.4                              | 165                            | 1                                                          | M                                                     | NSA                                                                                                     |
| PUID16585552   | Ca8         | 3998448                 | (TGGT)3                      | 18                                | TTCAGGAATCTGTTCAAGTC             | TGACAAGCTTAATGGGAGAGA            | 308-811           | 605-754                         | AP2                             | TFGMS579                              | 54.5                              | 143                            | 1                                                          | M                                                     | NSA                                                                                                     |
| PUID16585553   | Ca7         | 31541951                | (CAA)4                       | 12                                | GAAATGGGTTTCAATGCTTAT            | CACCTTCAAAATCACTCAAGTC           | 159-794           | 582-752                         | Zi-Dof                          | TFGMS580                              | 55.0                              | 142                            | 1                                                          | M                                                     | NSA                                                                                                     |
| PUID16585554   | Ca4         | 4747167                 | (TTA)5                       | 15                                | GTCCGACGAATTAGGAAGA              | GATGATGATTCTCTCAACCA             | 567-1703          | 1047-1202                       | Myb DNA binding                 | TFGMS581                              | 54.5                              | 155                            | 1                                                          | M                                                     | NSA                                                                                                     |
| PUID16585555   | Ca6         | 42716986                | (ATT)4                       | 12                                | ACCTCTGTTGTTCTTCTGCT             | TTTGTAAAGGGTAGCTAGGG             | 185-459           | 404-459                         | Zi-Dof                          | TFGMS582                              | 55.4                              | 149                            | 1                                                          | M                                                     | NSA                                                                                                     |
| PUID16585556   | Ca6         | 42716798                | (CAC)4                       | 12                                | CCATACCACTGCTTATCTTG             | ACTTCTCCATTAGGTTGAGA             | 185-459           | 404-459                         | Zi-Dof                          | TFGMS583                              | 55.0                              | 146                            | 1                                                          | M                                                     | NSA                                                                                                     |
| PUID16585557   | Ca2         | 4036194                 | (TGA)7                       | 21                                | GGCTCTTGATACCCCTACAAT            | CATCATCATGTTAATGCAATG            | 22-1077           | 742-951                         | TCP                             | TFGMS584                              | 55.0                              | 160                            | 1                                                          | M                                                     | NSA                                                                                                     |
| PUID16585558   | Ca6         | 1609146                 | (TCAATT)3                    | 18                                | CCTTCCCTTTTCAACCTCAT             | CCATAAGGATGATGCAAACTT            | 257-1725          | 1106-1725                       | DUF3633                         | TFGMS585                              | 54.4                              | 153                            | 1                                                          | M                                                     | NSA                                                                                                     |
| PUID16585559   | Ca6         | 1609208                 | (TTCTCT)3                    | 18                                | TACCTCCACATCATTTTCATT            | TATATGCAAGGGTGAGAAGA             | 257-1725          | 1106-1725                       | DUF3633                         | TFGMS586                              | 54.6                              | 134                            | 1                                                          | M                                                     | NSA                                                                                                     |
| PUID16585560   | Ca6         | 21497375                | (AAT)5                       | 15                                | ATTGCTCAAGTTGTCAATGAT            | TGTTATGCGAGTCTCCTAACTC           | 294-1139          | 468-578                         | bZIP                            | TFGMS587                              | 54.8                              | 148                            | 1                                                          | M                                                     | NSA                                                                                                     |
| PUID16585561   | 0           | 0                       | (ACAT)3                      | 12                                | CAAGCTTCGTTAGTGAAGAG             | CTCCACTGAGTCCAAATCACTG           | 231-1772          | 1050-1262                       | Sigma70                         | TFGMS588                              | 55.1                              | 157                            | 1                                                          | M                                                     | NSA                                                                                                     |
| PUID16585562   | Ca5         | 30587088                | (CTT)6                       | 18                                | CTTTTATCTTCTGCAAAACCA            | CAAGAGCAAGACAAGAAGAG             | 332-4186          | 2864-3088                       | SWIB                            | TFGMS589                              | 55.3                              | 149                            | 1                                                          | M                                                     | NSA                                                                                                     |
| PUID16585563   | Ca5         | 30587245                | (CTTCT)4                     | 24                                | TTTTCATCGTCTACTTGTGAT            | CAAGAGCAAGACAAGAAGAG             | 332-4186          | 2864-3088                       | SWIB                            | TFGMS590                              | 54.8                              | 157                            | 1                                                          | M                                                     | NSA                                                                                                     |
| PUID16585564   | Ca5         | 30587245                | (TTCTCC)3                    | 18                                | TTTTCATCGTCTACTTGTGAT            | TTGATGGTAGAGCAAGAACAT            | 332-4186          | 2864-3088                       | SWIB                            | TFGMS591                              | 54.8                              | 157                            | 1                                                          | M                                                     | NSA                                                                                                     |
| PUID16585565   | Ca5         | 30597169                | (AAGA)3                      | 12                                | GCTGATCAGTTGTGGTAGAAG            | CGACTTGAATCTCTCCTGTAA            | 84-709            | 282-635                         | PTZ0368                         | TFGMS592                              | 55.0                              | 161                            | 1                                                          | M                                                     | NSA                                                                                                     |
| PUID16585566   | Ca1         | 6750597                 | (TQ)8                        | 16                                | TACCCAGATGAGATCTACGAA            | GGATGGTATCACTGTTGTGT             | 220-1209          | 904-1059                        | Myb DNA binding                 | TFGMS593                              | 54.9                              | 152                            | 1                                                          | M                                                     | NSA                                                                                                     |
| PUID16585567   | Ca1         | 6750597                 | (TCT)6                       | 18                                | TACCCAGATGAGATCTACGAA            | GGATGGTATCACTGTTGTGT             | 220-1209          | 904-1059                        | Myb DNA binding                 | TFGMS594                              | 54.9                              | 152                            | 1                                                          | M                                                     | NSA                                                                                                     |
| PUID16585568   | Ca1         | 6738406                 | (TGTGT)3                     | 18                                | TAGTTTATTGGGTTTTCACCA            | GATCAGCAGTCAAAACGAGC             | 58-966            | 187-342                         | Myb DNA binding                 | TFGMS595                              | 54.9                              | 163                            | 1                                                          | M                                                     | NSA                                                                                                     |
| PUID16585569   | Ca7         | 8420056                 | (AAC)4                       | 12                                | AGGTCCAAAGAAAGTGAAC              | CATTGTTTTCTTCCCTCCTT             | 140-952           | 242-577                         | Response-reg                    | TFGMS596                              | 54.9                              | 152                            | 1                                                          | M                                                     | NSA                                                                                                     |
| PUID16585570   | Ca5         | 21386462                | (ATG)5                       | 15                                | TATGTCATCGGAAACAAC               | CTGTTCGTGTCATCACTAATTC           | 140-952           | 242-577                         | Response-reg                    | TFGMS597                              | 54.8                              | 148                            | 1                                                          | M                                                     | NSA                                                                                                     |
| PUID16585571   | 0           | 0                       | (CAC)5                       | 15                                | CCCGTCTCTCCGCGCAT                | CATCATTAGTGTCCGTAGGTT            | 223-801           | 223-304                         | tily                            | TFGMS598                              | 64.5                              | 169                            | 1                                                          | M                                                     | NSA                                                                                                     |
| PUID16585572   | Ca3         | 23622409                | (AAC)6                       | 18                                | CCAAATAGCTCAACACAAG              | TGAAGAGAGATTTCAACTGG             | 9-683             | 297-470                         | WRKY                            | TFGMS599                              | 55.2                              | 152                            | 1                                                          | M                                                     | NSA                                                                                                     |
| PUID16585573   | Ca2         | 4036035                 | (TCA)7                       | 21                                | CAACCAAAAAGACAAGATGA             | GGCTCTTGATACCCCTACAAT            | 51-836            | 177-380                         | TCP                             | TFGMS600                              | 55.5                              | 160                            | 1                                                          | M                                                     | NSA                                                                                                     |
| PUID16585574   | Ca8         | 3997874                 | (AAG)4                       | 12                                | ACATAACACAACACCTTTCA             | CAGGAATCTTGTCAAGTCAA             | 181-684           | 238-387                         | AP2                             | TFGMS601                              | 54.8                              | 154                            | 1                                                          | M                                                     | NSA                                                                                                     |
| PUID16585575   | Ca8         | 3997837                 | (AG)9                        | 18                                | TGACAAGCTTAATGGGAGAGA            | CAGCTTCCATCTTCTTCTCT             | 181-684           | 238-387                         | AP2                             | TFGMS602                              | 55.0                              | 154                            | 1                                                          | M                                                     | NSA                                                                                                     |
| PUID16585576   | Ca8         | 3998306                 | (CATAAC)3                    | 18                                | TTGATGCTCTCAAGCTACTGC            | CACCTTCATCTCTTCTTCTGT            | 181-684           | 238-387                         | AP2                             | TFGMS603                              | 55.0                              | 143                            | 1                                                          | M                                                     | NSA                                                                                                     |
| PUID16585577   | Ca5         | 11382482                | (ATT)5                       | 15                                | TGCATACTTTCAAAGCAGTT             | CCTCATTCATCATAGAGAGC             | 159-1967          | 936-1121                        | RRM                             | TFGMS604                              | 55.4                              | 149                            | 1                                                          | M                                                     | NSA                                                                                                     |
| PUID16585578   | Ca8         | 8639326                 | (AGA)4                       | 12                                | TGAGATTGGTGTGAAGAAGG             | AATTTTGTCCACCTTGAAGCTAC          | 57-220            | 57-167                          | Myb DNA binding                 | TFGMS605                              | 54.6                              | 155                            | 1                                                          | M                                                     | NSA                                                                                                     |
| PUID16585579   | Ca5         | 29821891                | (TATGC)3                     | 15                                | ACGGAAGTGTGGTTAATTT              | CACCACCACTCACTACCTAGC            | 1-02522           | 9-218                           | Myb DNA binding                 | TFGMS606                              | 55.4                              | 169                            | 1                                                          | M                                                     | NSA                                                                                                     |
| PUID16585580   | Ca4         | 38422591                | (AGA)4                       | 12                                | TTGAGAAGCACTCAAGAAGG             | CAACACGGAATATACGTTCTC            | 198-974           | 501-761                         | YTH1                            | TFGMS607                              | 55.1                              | 132                            | 1                                                          | M                                                     | NSA                                                                                                     |
| PUID16585581   | Ca4         | 4988759                 | (ATT)6                       | 18                                | AGGTGCGAGGCTAGTATAGGA            | TCATTTCTGTGCCCTAATGAA            | 19-261            | 19-258                          | AUX-IAA                         | TFGMS608                              | 55.0                              | 153                            | 1                                                          | M                                                     | NSA                                                                                                     |
| PUID16585582   | Ca3         | 31212701                | (ATC)4                       | 12                                | TGATATGAGAGGTTCTTCAGC            | ACTTGTGTGTTTACCAAGCTCA           | 13-351            | 58-159                          | AP2                             | TFGMS609                              | 54.6                              | 150                            | 1                                                          | M                                                     | NSA                                                                                                     |
| PUID16585583   | Ca5         | 166458                  | (AATCCA)5                    | 30                                | ATTCCAGAGTTAGTCCCAAC             | TTCTTCTTCAGCTGTGATGAAA           | 23-1294           | 194-571                         | NAM                             | TFGMS610                              | 55.1                              | 147                            | 3                                                          | P                                                     | NSA                                                                                                     |
| PUID16585584   | Ca1         | 390511                  | (CAA)5                       | 15                                | GAAGTAAGCAAGTAGGCTCC             | AAGGTGTTGTTGATGAGAATG            | 41-1297           | 380-691                         | TCP family transcription factor | TFGMS611                              | 55.1                              | 157                            | 3                                                          | P                                                     | NSA                                                                                                     |
| PUID16585585   | Ca4         | 43891008                | (AATTA)4                     | 24                                | AATGAATTTGGTTGTTCTGTG            | CGCAATTAAAGAACTCCATTAT           | 660-1991          | 725-845                         | HomeoBox                        | TFGMS612                              | 55.2                              | 148                            | 3                                                          | P                                                     | NSA                                                                                                     |
| PUID16585586   | Ca1         | 389670                  | (GGC)4                       | 12                                | AATAACAACAACGAAGTGCT             | GTTTGAAGAAGGTTGTGATAT            | 41-1297           | 380-691                         | TCP                             | TFGMS613                              | 54.0                              | 148                            | 4                                                          | P                                                     | NSA                                                                                                     |
| PUID16585587   | Ca1         | 389726                  | (TTTC)4                      | 12                                | ATTCACAACGAGAATTACATAT           | TTCACTTCAACCATAGATATC            | 41-1297           | 380-691                         | TCP family transcription factor | TFGMS614                              | 54.7                              | 152                            | 3                                                          | P                                                     | NSA                                                                                                     |
| PUID16585588   | Ca3         | 21366252                | (TCC)6                       | 18                                | CCTTAGCTTTGACAAATTCCTT           | CAGAGAGGTAATCATTTGTTGG           | 148-660           | 175-324                         | WRKY                            | TFGMS615                              | 55.4                              | 155                            | 3                                                          | P                                                     | NSA                                                                                                     |
| PUID16585589   | Ca5         | 166695                  | (TCAC)3                      | 12                                | CAAAACCCCTCCTTCAAGTAA            | GCATCAGCAAGTAGACAAAT             | 23-1294           | 194-571                         | NAM                             | TFGMS616                              | 56.8                              | 152                            | 4                                                          | P                                                     | NSA                                                                                                     |
| PUID16585590   | Ca5         | 166052                  | (TCCC)3                      | 12                                | CGAGTATACAAGAGAGCAGGA            | AGCTGCCTTATTAGAGTGTC             | 23-1294           | 194-571                         | No apical meristem (NAM)        | TFGMS617                              | 55.4                              | 147                            | 3                                                          | P                                                     | NSA                                                                                                     |

| NCBI Probe IDs | Chromosomes | Physical positions (bp) | Microsatellite repeat-motifs | Microsatellite repeat length (bp) | Forward Primer sequences (5'-3') | Reverse Primer sequences (5'-3') | ORF position (bp) | Functional domain position (bp) | Functional domain               | Types of genic microsatellite markers | Actual annealing temperature (°C) | Size (bp) of alleles amplified | Total number of alleles amplified among chickpea varieties | Polymorphic potential monomorphic (M)/polymorphic (P) | R2 value of marker loci showing significant association (P ≤ 0.05) with three major seed and pod traits |
|----------------|-------------|-------------------------|------------------------------|-----------------------------------|----------------------------------|----------------------------------|-------------------|---------------------------------|---------------------------------|---------------------------------------|-----------------------------------|--------------------------------|------------------------------------------------------------|-------------------------------------------------------|---------------------------------------------------------------------------------------------------------|
| PUIID16585591  | Ca8         | 5196786                 | (GAA)4                       | 12                                | GTTATGGTGTGAATTTTGAGG            | TAGATCTCACACACACAATGG            | 32-766            | 332-493                         | Zi-HD                           | TFGM5618                              | 54.7                              | 143                            | 3                                                          | P                                                     | NSA                                                                                                     |
| PUIID16585592  | Ca2         | 30868340                | (CAG)7                       | 21                                | TTGGTTAAGGATGTTCCCTTCT           | ACCGTAGTCTGAGGAGAAGAAG           | 240-2327          | 432-623                         | ANK                             | TFGM5619                              | 55.5                              | 154                            | 3                                                          | P                                                     | NSA                                                                                                     |
| PUIID16585593  | 0           | 0                       | (ATTCT)4                     | 20                                | GGGTCAATCATCAAAACCA              | AGTTCTGAAGTCATGATGAGGG           | 137-733           | 275-421                         | TCP                             | TFGM5620                              | 54.9                              | 147                            | 2                                                          | P                                                     | NSA                                                                                                     |
| PUIID16585594  | Ca4         | 22196748                | (TTG)9                       | 27                                | CAGGAGTTGAAACTGAAACAC            | CCATTGTCTTACGTTAAAAA             | 1-1302            | 853-1101                        | Myb DNA binding                 | TFGM5621                              | 54.9                              | 155                            | 3                                                          | P                                                     | NSA                                                                                                     |
| PUIID16585595  | Ca7         | 19831349                | (CT)18                       | 36                                | ACCGCCTCAATTTCTCTTTA             | TAATTTACGGACAGTGCTTT             | 191-838           | 345-610                         | PLAT2                           | TFGM5622                              | 56.6                              | 148                            | 4                                                          | P                                                     | NSA                                                                                                     |
| PUIID16585596  | Ca6         | 466443                  | (CAA)7                       | 21                                | CAAGCTCACACTGAACCTCTCT           | GTTGTGTAGTTGTGGTGATTT            | 779-1438          | 896-1051                        | Myb DNA binding                 | TFGM5623                              | 54.8                              | 146                            | 3                                                          | P                                                     | NSA                                                                                                     |
| PUIID16585597  | Ca5         | 47725906                | (TGT)7                       | 21                                | ATATTTTGTGTGGTGTGCG              | GCACAGGTGAAGCATAGTAGT            | 105-2279          | 918-1322                        | POX                             | TFGM5624                              | 55.2                              | 155                            | 4                                                          | P                                                     | NSA                                                                                                     |
| PUIID16585598  | Ca3         | 16813885                | (ATTCAT)6                    | 36                                | CCTTTCACTCATCACTTCAAC            | AGGATAAAGGTGAAGCAAATC            | 300-967           | 1392-1535                       | HLH                             | TFGM5625                              | 54.8                              | 165                            | 6                                                          | P                                                     | NSA                                                                                                     |
| PUIID16585599  | 0           | 0                       | (AT)16                       | 32                                | TTGTCAACCATATCTCCCACT            | CCAATATCTATTCACTTGCACCT          | 295-1413          | 637-909                         | Thioredoxine                    | TFGM5626                              | 55.1                              | 144                            | 4                                                          | P                                                     | NSA                                                                                                     |
| PUIID16585600  | Ca7         | 20120406                | (GAA)8                       | 24                                | AACATCATCATCAAGTTGGAG            | GGTTGTGCTGGAATAAATC              | 128-840           | 677-832                         | Myb DNA binding                 | TFGM5627                              | 55.1                              | 154                            | 3                                                          | P                                                     | NSA                                                                                                     |
| PUIID16585601  | Ca1         | 7416772                 | (CAT)4                       | 12                                | ATCAAAACAAAAGACCAGTTGA           | GTTTTGCATATCTACCCAGCAG           | 30-2006           | 1-564                           | START                           | TFGM5628                              | 54.9                              | 147                            | 5                                                          | P                                                     | NSA                                                                                                     |
| PUIID16585602  | Ca7         | 17774538                | (AAAAAC)3                    | 18                                | GGTGTGTAAAAACAAGAAAAAC           | TCCTTATGTTGCAATGATATCC           | 428-1636          | 1043-1531                       | MFMR                            | TFGM5629                              | 54.0                              | 141                            | 4                                                          | P                                                     | NSA                                                                                                     |
| PUIID16585603  | Ca1         | 26033416                | (AT)6                        | 12                                | GGCTTACTATCTTGCCAATG             | GGAAGAGTGAAGTCTTGTTT             | 253-3357          | 2689-3213                       | SBP                             | TFGM5630                              | 55.1                              | 150                            | 4                                                          | P                                                     | NSA                                                                                                     |
| PUIID16585604  | Ca3         | 38689024                | (TCA)6                       | 18                                | AACACTTGAACATTTCAAACC            | CAAGTTCCCTTCTTCTTCCCT            | 58-1188           | 258-976                         | Myb                             | TFGM5631                              | 54.3                              | 153                            | 3                                                          | P                                                     | NSA                                                                                                     |
| PUIID16585605  | Ca4         | 1123733                 | (ACA)8                       | 24                                | TAAAGGCGACTTCTTGAGGAA            | TGGTGATGAAGATGAAGAGGAA           | 29-736            | 171-510                         | DUF640                          | TFGM5632                              | 60.0                              | 250                            | 4                                                          | P                                                     | NSA                                                                                                     |
| PUIID16585606  | Ca4         | 7122162                 | (GT)6                        | 12                                | GAAAGATCAACACATCCTCA             | CAAAAGCTGTGAAAAATAGC             | 724-1293          | 732-810                         | WRKY                            | TFGM5633                              | 55.2                              | 161                            | 6                                                          | P                                                     | NSA                                                                                                     |
| PUIID16585607  | 0           | 0                       | (ATTTT)3                     | 15                                | CGAAGACAACTTTTATTAGG             | AATGATCAACTACCTACCATTTGG         | 573-1883          | 1401-1847                       | bHLH MYC                        | TFGM5634                              | 53.6                              | 151                            | 3                                                          | P                                                     | NSA                                                                                                     |
| PUIID16585608  | 0           | 0                       | (TTC)4                       | 12                                | CATAGCCTCATCTCATTCAT             | ATGAATGAGATGAAGGCTATG            | 224-2434          | 230-1321                        | GRAS                            | TFGM5635                              | 54.4                              | 146                            | 3                                                          | P                                                     | NSA                                                                                                     |
| PUIID16585609  | 0           | 0                       | (TCA)4                       | 16                                | CAAAACCAAAAGCAAAACA              | CACGAAAACAGATCTTCAG              | 186-1187          | 604-713                         | tily                            | TFGM5636                              | 59.1                              | 151                            | 3                                                          | P                                                     | NSA                                                                                                     |
| PUIID16585610  | Ca1         | 27450034                | (ATT)4                       | 12                                | TCTACAGACACAAAAGGGGTA            | TATGATGAGTGTTGGTGA               | 589-1512          | 895-1320                        | DUF702                          | TFGM5637                              | 54.9                              | 150                            | 3                                                          | P                                                     | NSA                                                                                                     |
| PUIID16585611  | Ca6         | 5237688                 | (CA)5                        | 15                                | TGTCCTTCTTCATCTTCACT             | TGATCTATTTCTTGCCACAT             | 49-1863           | 1177-1296                       | HOX                             | TFGM5638                              | 55.1                              | 151                            | 2                                                          | P                                                     | NSA                                                                                                     |
| PUIID16585612  | Ca4         | 5082391                 | (TCA)4                       | 12                                | TTCCATAACCTCCAGAACCTCA           | CTTTGTCCCAATAATTCGTC             | 135-1787          | 1365-1622                       | Myb DNA binding                 | TFGM5639                              | 55.0                              | 149                            | 3                                                          | P                                                     | NSA                                                                                                     |
| PUIID16585613  | Ca4         | 5018179                 | (ATA)4                       | 12                                | TGTATCTGACCCAAAAGAAGA            | TAATCTTGAACGCTCAITTTGT           | 307-1599          | 336-716                         | bZIP                            | TFGM5640                              | 55.0                              | 143                            | 3                                                          | P                                                     | NSA                                                                                                     |
| PUIID16585614  | Ca7         | 11430566                | (CAT)6                       | 18                                | TGTTTAGGCTAGTCAATTTTCA           | TCTTGTGTTGTTGTTGTTGA             | 6-983             | 429-974                         | GRAS                            | TFGM5641                              | 54.5                              | 166                            | 4                                                          | P                                                     | NSA                                                                                                     |
| PUIID16585615  | Ca5         | 32787926                | (ATA)4                       | 12                                | GAAACAATCCAACTCAAGATTG           | GTTGAAACTTTGAGGAACCTTG           | 502-1095          | 609-735                         | HLH                             | TFGM5642                              | 54.5                              | 147                            | 3                                                          | P                                                     | NSA                                                                                                     |
| PUIID16585616  | Ca6         | 24448740                | (TC)6                        | 12                                | ACCAACTCAGATCTAGAAGCA            | TGTTGTTGATGAAGGAATTTG            | 183-1043          | 381-518                         | Myb DNA binding                 | TFGM5643                              | 55.0                              | 157                            | 4                                                          | P                                                     | NSA                                                                                                     |
| PUIID16585617  | Ca4         | 16278898                | (ACTACC)3                    | 18                                | GCTCTGGTGTCTTGCTTTC              | ATGAACAAGTGAAGAGGTGA             | 1-1145            | 333-467                         | CCT                             | TFGM5644                              | 55.0                              | 152                            | 3                                                          | P                                                     | NSA                                                                                                     |
| PUIID16585618  | Ca1         | 389670                  | (GGC)4                       | 12                                | AATAACAACAACGAAGTGGT             | AAGATGAAGAAGAAGTCCAC             | 41-1297           | 380-691                         | TCP family transcription factor | TFGM5645                              | 54.0                              | 148                            | 3                                                          | P                                                     | NSA                                                                                                     |
| PUIID16585619  | Ca1         | 393033                  | (TCT)5                       | 15                                | ATCCCAACAACCTTCTTCAAC            | AAGATGAAGAAGAAGTCCAC             | 41-1297           | 380-691                         | TCP                             | TFGM5646                              | 55.8                              | 140                            | 3                                                          | P                                                     | NSA                                                                                                     |
| PUIID16585620  | Ca5         | 166287                  | (CA)5                        | 15                                | TGACAACAAGTCTTGGTCTTT            | GGGAGAGGGAGTGAAGAAGTA            | 23-1294           | 194-571                         | No apical meristem (NAM)        | TFGM5647                              | 55.1                              | 154                            | 2                                                          | P                                                     | NSA                                                                                                     |
| PUIID16585621  | Ca5         | 166695                  | (TCA)3                       | 12                                | CAAAACCCCTCCTCAAGTAA             | GGAATTAATGAGAGTGACAAAGC          | 23-1294           | 194-571                         | No apical meristem (NAM)        | TFGM5648                              | 56.8                              | 152                            | 4                                                          | P                                                     | NSA                                                                                                     |
| PUIID16585622  | 0           | 0                       | (AAAT)3                      | 12                                | CCTTGTTTGCCTCTTATTAT             | CATAAGCATGGGTTTATACAT            | 238-618           | 312-459                         | HMG- BOX                        | TFGM5649                              | 55.4                              | 149                            | 2                                                          | P                                                     | NSA                                                                                                     |
| PUIID16585623  | Ca4         | 7706345                 | (AGG)4                       | 12                                | CAAGAACAGAGATAGCCTTGA            | TAAATCAAGCTCTTCCACCT             | 1070-3409         | 1435-1669                       | SBP                             | TFGM5650                              | 54.9                              | 144                            | 3                                                          | P                                                     | NSA                                                                                                     |
| PUIID16585624  | Ca5         | 30587088                | (CTT)6                       | 18                                | TCTTTATCTTCTGCAAAACCA            | CAAGAGCAAGAACAAGAAGAG            | 333-4583          | 1497-1719                       | SWIB                            | TFGM5651                              | 55.3                              | 149                            | 3                                                          | P                                                     | NSA                                                                                                     |
| PUIID16585625  | Ca5         | 30587245                | (TTCTCC)3                    | 18                                | TTTCATGCTGCTACTTGGTGT            | TTGATGGTAGAGCAAGAACAT            | 333-4583          | 1497-1719                       | SWIB                            | TFGM5652                              | 54.8                              | 157                            | 2                                                          | P                                                     | NSA                                                                                                     |
| PUIID16585626  | Ca5         | 30587088                | (CTT)6                       | 18                                | TCTTTATCTTCTGCAAAACCA            | CAAGAGCAAGAACAAGAAGAG            | 332-4186          | 1101-1323                       | SWIB                            | TFGM5653                              | 55.3                              | 149                            | 3                                                          | P                                                     | NSA                                                                                                     |
| PUIID16585627  | Ca5         | 30587245                | (CTTCTC)4                    | 24                                | TTTCATGCTGCTACTTGGTGT            | CAAGAGCAAGAACAAGAAGAG            | 332-4186          | 1101-1323                       | SWIB                            | TFGM5654                              | 54.8                              | 157                            | 6                                                          | P                                                     | NSA                                                                                                     |
| PUIID16585628  | Ca5         | 30587245                | (TTCTCC)3                    | 18                                | TTTCATGCTGCTACTTGGTGT            | TTGATGGTAGAGCAAGAACAT            | 332-4186          | 1101-1323                       | SWIB                            | TFGM5655                              | 54.8                              | 157                            | 2                                                          | P                                                     | NSA                                                                                                     |
| PUIID16585629  | 0           | 0                       | (AG)6                        | 12                                | TGTGAGTGAATGAAGAAACGA            | TCAGACATAGTAGCCCAAGAA            | 406-1812          | 1429-1614                       | RPM                             | TFGM5656                              | 54.3                              | 151                            | 4                                                          | P                                                     | NSA                                                                                                     |
| PUIID16585630  | Ca4         | 30317401                | (CTT)4                       | 12                                | CACTTTCTGCCATCTCAACTG            | TCCTGCTTTTCTTCTTTAGT             | 900-2052          | 1779-2048                       | SNF2                            | TFGM5657                              | 55.0                              | 143                            | 2                                                          | P                                                     | NSA                                                                                                     |
| PUIID16585631  | Ca4         | 35417258                | (CCATT)4                     | 20                                | TTCAATTAGCTTGAAGCACTC            | CCTTCCTGGACATCTTAATTT            | 1046-1738         | 1478-1642                       | TCP                             | TFGM5658                              | 55.0                              | 150                            | 4                                                          | P                                                     | NSA                                                                                                     |
| PUIID16585632  | 0           | 0                       | (CT)10                       | 20                                | AAGACCGTGTGCTATTACC              | TTTCAACTTTTCCACCATCAG            | 3100-6000         | 229-1128                        | Amino oxidase                   | TFGM5659                              | 55.2                              | 151                            | 6                                                          | P                                                     | NSA                                                                                                     |
| PUIID16585633  | Ca7         | 32855952                | (TTTGAT)6                    | 36                                | CAAGAAGGTGAAGTTAAAGCA            | ATTCAACCTCAGAGTTTCAGA            | 145-1233          | 874-1008                        | WRC                             | TFGM5660                              | 55.0                              | 155                            | 4                                                          | P                                                     | NSA                                                                                                     |
| PUIID16585634  | 0           | 0                       | (TAT)4                       | 12                                | GCCAGCAAGATTTAAAGTACC            | TATAACTGTGAGGTTCCCATTT           | 13-2676           | 2274-2591                       | SET                             | TFGM5661                              | 55.7                              | 156                            | 3                                                          | P                                                     | NSA                                                                                                     |
| PUIID16585635  | Ca4         | 40578103                | (TGG)4                       | 12                                | ATAGTTCAACAAGCTGGTGGAG           | CACCAAAACCAAAATTAACAC            | 4225-4545         | 4957-5257                       | JmjC                            | TFGM5662                              | 54.3                              | 147                            | 3                                                          | P                                                     | NSA                                                                                                     |
| PUIID16585636  | Ca6         | 27673714                | (GTT)4                       | 12                                | CAGAATAGGTGTTGATGGAAA            | AAAGTTGAAGGGGACAAACTAC           | 85-1474           | 956-1204                        | Auxin_resp                      | TFGM5663                              | 55.2                              | 138                            | 4                                                          | P                                                     | NSA                                                                                                     |
| PUIID16585637  | 0           | 0                       | (CT)7                        | 14                                | GTTTCAGGGAACATCGTITT             | GTTCTGCGCAGTAAAAGAGTA            | 325-1467          | 505-753                         | SWIRM                           | TFGM5664                              | 55.0                              | 121                            | 4                                                          | P                                                     | NSA                                                                                                     |
| PUIID16585638  | Ca5         | 23874393                | (AG)13                       | 26                                | TACAAAAGATCAAAACCAAG             | TTTCTCCACAATTCCTGTTA             | 357-1349          | 819-1136                        | BTB                             | TFGM5665                              | 54.6                              | 165                            | 6                                                          | P                                                     | NSA                                                                                                     |
| PUIID16585639  | Ca5         | 23874598                | (TC)13                       | 26                                | ACCTTCCAACAATCTCTCC              | CAAGTAAGGACAAGAAAAGAAA           | 229-753           | 442-750                         | BTB                             | TFGM5666                              | 54.9                              | 157                            | 4                                                          | P                                                     | NSA                                                                                                     |
| PUIID16585640  | Ca7         | 5352233                 | (CT)8                        | 16                                | AACGTGTGAATGAAGGAACATA           | GGGAGAGAAGGAAGAGAGAA             | 597-2036          | 1059-1139                       | ZICCCOH                         | TFGM5667                              | 54.9                              | 154                            | 3                                                          | P                                                     | NSA                                                                                                     |
| PUIID16585641  | Ca3         | 37789311                | (GAA)5                       | 15                                | TACATGTTCAAGCAGCTAGA             | TCTTCTTCTTGCTCCTCTCT             | 1804-3588         | 3277-3414                       | PHD                             | TFGM5668                              | 54.7                              | 150                            | 2                                                          | P                                                     | NSA                                                                                                     |
| PUIID16585642  | Ca2         | 15303660                | (GAA)6                       | 18                                | AGAAGAGGACGAGAAGAAGA             | CCAATTTCTAAATTTCAAACC            | 1804-3588         | 3277-3414                       | PHD                             | TFGM5669                              | 55.1                              | 138                            | 3                                                          | P                                                     | NSA                                                                                                     |
| PUIID16585643  | Ca3         | 37789311                | (GAC)4                       | 12                                | TACATGTTCAAGCAGCTAGA             | AGGTACAAGAAGTGCACAACA            | 1804-3588         | 3277-3414                       | PHD                             | TFGM5670                              | 54.7                              | 150                            | 2                                                          | P                                                     | NSA                                                                                                     |
| PUIID16585644  | Ca4         | 43891170                | (AGA)8                       | 24                                | GTTTATGGTGTGAAGGTGTA             | TACTCTAGCGTTCTTCCCTCT            | 660-1991          | 725-845                         | HomoBox                         | TFGM5671                              | 55.2                              | 149                            | 2                                                          | P                                                     | NSA                                                                                                     |
| PUIID16585645  | Ca5         | 45306950                | (ATG)4                       | 12                                | TATAAACCCGCGCAAGTTTCG            | GTACCCCACTAAATCACTTCA            | 213-1883          | 942-1172                        | PWWP                            | TFGM5672                              | 55.6                              | 146                            | 2                                                          | P                                                     | NSA                                                                                                     |
| PUIID16585646  | Ca8         | 8364902                 | (CTA)7                       | 21                                | CACAAGGGTTATGATAGTGC             | CCATGATAAGAAGACAACCTG            | 125-2557          | 989-1666                        | START                           | TFGM5673                              | 54.9                              | 150                            | 4                                                          | P                                                     | NSA                                                                                                     |
| PUIID16585647  | Ca6         | 37387965                | (GAA)6                       | 18                                | TGTTCTGAATTCGTTTTCAGG            | ACCCACAATTAAGAAGACACAA           | 1-1215            | 1098-1215                       | DNA bind                        | TFGM5674                              | 55.4                              | 150                            | 4                                                          | P                                                     | NSA                                                                                                     |
| PUIID16585648  | Ca6         | 3867508                 | (AAGAG)5                     | 30                                | GATGCACATCATCTTCTCTG             | TCCACTTCCACCTATTTATG             | 95-1465           | 233-679                         | NAM                             | TFGM5675                              | 55.8                              | 147                            | 3                                                          | P                                                     | NSA                                                                                                     |
| PUIID16585649  | Ca4         | 42357099                | (TGA)4                       | 12                                | AAATTGAGCATGAATGGTATG            | CCTCTCAGTATAACCCCAACAA           | 14-1012           | 395-631                         | DGDI                            | TFGM5676                              | 55.2                              | 173                            | 4                                                          | P                                                     | NSA                                                                                                     |
| PUIID16585650  | Ca5         | 30989819                | (TTTC)4                      | 12                                | GATACGAGCAATCAACACAC             | CTCTTTGAAGAGGAAGGTGG             | 380-1585          | 886-943                         | Arg1                            | TFGM5677                              | 54.9                              | 166                            | 2                                                          | P                                                     | NSA                                                                                                     |
| PUIID16585651  | Ca7         | 4875496                 | (CGTAA)4                     | 20                                | GAATGTTGTTGATAGGTTGGA            | TGATTGATGGAATGAAGGAGAG           | 74-2470           | 1994-2305                       | BTB                             | TFGM5678                              | 55.1                              | 142                            | 3                                                          | P                                                     | NSA                                                                                                     |
| PUIID16585652  | Ca5         | 38288717                | (AAC)7                       | 21                                | TGAACACGTTTCTCTCTCTC             | GTTTGTGGAAGTGAATCAACA            | 763-1605          | 1048-1176                       | HLH                             | TFGM5679                              | 54.7                              | 148                            | 3                                                          | P                                                     | NSA                                                                                                     |

| NCBI Probe IDs | Chromosomes | Physical positions (bp) | Microsatellite repeat-motifs | Microsatellite repeat length (bp) | Forward Primer sequences (5'-3') | Reverse Primer sequences (5'-3') | ORF position (bp) | Functional domain position (bp) | Functional domain | Types of genic microsatellite markers | Actual annealing temperature (°C) | Size (bp) of alleles amplified | Total number of alleles amplified among chickpea varieties | Polymorphic potential monomorphic (M)/polymorphic (P) | R2 value of marker loci showing significant association (P ≤ 0.05) with three major seed and pod traits |
|----------------|-------------|-------------------------|------------------------------|-----------------------------------|----------------------------------|----------------------------------|-------------------|---------------------------------|-------------------|---------------------------------------|-----------------------------------|--------------------------------|------------------------------------------------------------|-------------------------------------------------------|---------------------------------------------------------------------------------------------------------|
| PUIID16585653  | Ca2         | 3451762                 | (CACAAA)4                    | 24                                | GGAGGTTATAACAAACCAAC             | AAATAGTCATGCAACTCAAGC            | 1700-2668         | 1931-2113                       | Zf-HD             | TFGMS680                              | 53.7                              | 150                            | 2                                                          | P                                                     | NSA                                                                                                     |
| PUIID16585654  | Ca5         | 27757413                | (CCTT)4                      | 12                                | AAGTAAACCAACACAGATTCCCT          | TATGAAGCTTTGCAACTCAGG            | 332-2893          | 2198-2506                       | B3                | TFGMS681                              | 55.5                              | 144                            | 3                                                          | P                                                     | NSA                                                                                                     |
| PUIID16585655  | 0           | 0                       | (AG)8                        | 16                                | ACTTACTGCAAAAGAGGCAACA           | AGAAAGACCTTTGTCCCTCAAC           | 1827-4139         | 3456-3575                       | HomeoBox          | TFGMS682                              | 55.5                              | 147                            | 2                                                          | P                                                     | NSA                                                                                                     |
| PUIID16585656  | Ca6         | 13476735                | (ACA)4                       | 12                                | GTTTGAAGATAGGGAACCTCT            | GTTGTTCATGATAGTTGGTGGT           | 351-3140          | 750-890                         | HLH               | TFGMS683                              | 54.9                              | 150                            | 2                                                          | P                                                     | NSA                                                                                                     |
| PUIID16585657  | Ca7         | 11287223                | (CAA)4                       | 12                                | ATCACAGAAACAAATGCCCTTTA          | TTTGACCCGTTCTAACACAAA            | 0008-1972         | 947-1126                        | AP2               | TFGMS684                              | 55.0                              | 149                            | 3                                                          | P                                                     | NSA                                                                                                     |
| PUIID16585658  | Ca6         | 42715963                | (GGA)7                       | 21                                | TTTTGGAGGAGGAGATATAGG            | TTCCAAACCACTTGAAGATAA            | 35-828            | 251-433                         | Zf-dof            | TFGMS685                              | 55.1                              | 136                            | 3                                                          | P                                                     | NSA                                                                                                     |
| PUIID16585659  | Ca7         | 2334917                 | (TTG)7                       | 21                                | AATGGAAGTGGGAAGTAGTGGT           | TGGACCAAGTAATCTGAAGAAG           | 227-1168          | 251-454                         | AP2               | TFGMS686                              | 55.3                              | 139                            | 3                                                          | P                                                     | NSA                                                                                                     |
| PUIID16585660  | Ca6         | 27650321                | (CCA)4                       | 12                                | CCATTGGTATTAGGGTATTCA            | GGTCGTAGATTGAAAGAGGTT            | 580-3216          | 2719-2872                       | PHD               | TFGMS687                              | 54.2                              | 149                            | 3                                                          | P                                                     | NSA                                                                                                     |
| PUIID16585661  | Ca3         | 39818017                | (AAGA)6                      | 24                                | ACCTTCAGTGGCTGTTGATTTG           | CCATCATATCTACCTCCTCCT            | 479-1678          | 764-1003                        | B3                | TFGMS688                              | 55.6                              | 155                            | 2                                                          | P                                                     | NSA                                                                                                     |
| PUIID16585662  | Ca3         | 39817380                | (ATCCAC)3                    | 18                                | TAAGGAGAAAGAAATGGGAAGC           | CAAGTCTGTTGAGTTTCCCTA            | 479-1678          | 764-1003                        | B3                | TFGMS689                              | 55.4                              | 158                            | 3                                                          | P                                                     | NSA                                                                                                     |
| PUIID16585663  | Ca3         | 39817471                | (TATCAA)4                    | 24                                | CCAAGGTCTAACTCAGACACTA           | TTCTTCTTCTTCTCCTCCTC             | 479-1678          | 764-1003                        | B3                | TFGMS690                              | 55.4                              | 134                            | 2                                                          | P                                                     | NSA                                                                                                     |
| PUIID16585664  | 0           | 0                       | (TGAATT)4                    | 24                                | AAACTGTTCTGTTGTTGTGG             | GGCATTACAATTGTTTCTCA             | 224-2434          | 230-1321                        | GRAS              | TFGMS691                              | 55.3                              | 144                            | 2                                                          | P                                                     | NSA                                                                                                     |
| PUIID16585665  | Ca6         | 1609146                 | (TCATT)3                     | 18                                | CCTTCCTTTTCAACCTCTATT            | TCTGGTTCATGAAAAATTAC             | 257-1750          | 1106-1735                       | DUF3633           | TFGMS692                              | 54.4                              | 153                            | 3                                                          | P                                                     | NSA                                                                                                     |
| PUIID16585666  | Ca5         | 224208                  | (AT)6                        | 12                                | TCAACAACAACACTCCTTTTT            | GTGGTGCCTACAATATGATTTC           | 265-1221          | 793-948                         | ZF HD dimer       | TFGMS693                              | 54.9                              | 148                            | 4                                                          | P                                                     | NSA                                                                                                     |
| PUIID16585667  | Ca5         | 222915                  | (CTTTG)5                     | 25                                | AATGGAGAAAAAGCAAGAAC             | GGTTTGGATGCATCAAGCAAGT           | 265-1221          | 793-948                         | ZF HD dimer       | TFGMS694                              | 55.3                              | 144                            | 4                                                          | P                                                     | NSA                                                                                                     |
| PUIID16585668  | Ca1         | 3737225                 | (GAT)4                       | 12                                | ACCTTCAGTTTGAAGACCCATT           | AATCAATACCTGGCAGACAAA            | 246-1163          | 492-749                         | Bromodomain       | TFGMS695                              | 55.4                              | 145                            | 2                                                          | P                                                     | NSA                                                                                                     |
| PUIID16585669  | Ca4         | 7561185                 | (GAGAAA)4                    | 24                                | TGAACCTTCAGAGGTTGGTAA            | TTCCCTCTGTAGAGGTTTTCC            | 234-1424          | 756-1202                        | NAD binding       | TFGMS696                              | 55.0                              | 144                            | 3                                                          | P                                                     | NSA                                                                                                     |
| PUIID16585670  | Ca3         | 30149012                | (TTTTGT)3                    | 18                                | TAGGCTTCTCTTATTGCTGA             | TTGATATGGTTGGAGGTAGAA            | 119-1228          | 188-364                         | Zf-Doff           | TFGMS697                              | 54.7                              | 147                            | 2                                                          | P                                                     | NSA                                                                                                     |
| PUIID16585671  | 0           | 0                       | (CCT)4                       | 12                                | GGTCAAATGGTTAATCTTCC             | AGACACTGCTGATTGCTGAAC            | 753-1369          | 752-836                         | SBP               | TFGMS698                              | 55.2                              | 156                            | 3                                                          | P                                                     | NSA                                                                                                     |
| PUIID16585672  | Ca1         | 12343313                | (ATC)4                       | 12                                | CATATGGATCGAATAATCCAG            | TCCAATGAGTAAAGCAGAGAT            | 793-3417          | 2914-3075                       | PHD               | TFGMS699                              | 54.7                              | 152                            | 3                                                          | P                                                     | NSA                                                                                                     |
| PUIID16585673  | Ca5         | 31241318                | (CCAAAT)3                    | 18                                | AATTCCTCTCTCCATAACAC             | TCAATTCAAACCGAGTAAGA             | 53-2030           | 479-718                         | Bromodomain       | TFGMS700                              | 54.8                              | 145                            | 3                                                          | P                                                     | NSA                                                                                                     |
| PUIID16585674  | Ca3         | 36426872                | (TCATCT)5                    | 30                                | TTTGCACCCGCTTCTACTCT             | TGGCAATCACGTTTCTCAAA             | 115-1524          | 471-1191                        | Glycotransf       | TFGMS701                              | 60.2                              | 211                            | 3                                                          | P                                                     | NSA                                                                                                     |
| PUIID16585675  | Ca4         | 4748367                 | (GAA)6                       | 18                                | AGGCTTCCTAGTGAATCAATC            | GATGATGATTCTCTTCAACCA            | 599-1735          | 1079-1233                       | Myb DNA binding   | TFGMS702                              | 55.1                              | 160                            | 2                                                          | P                                                     | NSA                                                                                                     |
| PUIID16585676  | Ca5         | 34050111                | (CGG)5                       | 15                                | CTGAGGATTTTGAATTTGAAC            | TCATCTACACTCCGATCTCAC            | 293-1000          | 296-397                         | WRKY              | TFGMS703                              | 54.0                              | 145                            | 3                                                          | P                                                     | NSA                                                                                                     |
| PUIID16585677  | Ca6         | 6029323                 | (AG)8                        | 16                                | ATCTCTGGCTGAAAGAAAAAT            | GACAAAGAAAGCTGAGTGAAA            | 193-1119          | 196-1116                        | GAGA bind         | TFGMS704                              | 54.9                              | 136                            | 4                                                          | P                                                     | NSA                                                                                                     |
| PUIID16585678  | 0           | 0                       | (GA)12                       | 24                                | GAAACCCCAAGAGAGAGAGAG            | GCTGTTGTTGTGAGTTCTTCC            | 193-1119          | 196-1116                        | GAGA bind         | TFGMS705                              | 54.9                              | 138                            | 4                                                          | P                                                     | NSA                                                                                                     |
| PUIID16585679  | Ca3         | 20843382                | (AGT)4                       | 12                                | GCCATAAACGATGATATACGAT           | CTAGAGCAACTGCTACTCTG             | 3270-4370         | 3447-4355                       | WD40              | TFGMS706                              | 56.7                              | 143                            | 4                                                          | P                                                     | NSA                                                                                                     |
| PUIID16585680  | Ca3         | 20843695                | (CAT)4                       | 12                                | ACCATCATAACCATCATCATG            | TCATTAAACAAACCGCTCTGT            | 3270-4370         | 3447-4355                       | WD40              | TFGMS707                              | 54.6                              | 143                            | 2                                                          | P                                                     | NSA                                                                                                     |
| PUIID16585681  | Ca3         | 20843695                | (CATCAC)3                    | 18                                | ACCATCATAACCATCATCATC            | GGAAACCCCTAGGTATTGTTGT           | 3270-4370         | 3447-4355                       | WD40              | TFGMS708                              | 54.6                              | 143                            | 2                                                          | P                                                     | NSA                                                                                                     |
| PUIID16585682  | Ca3         | 28704381                | (AAT)7                       | 21                                | CCCAACACTCTCTCTCTCTTT            | TGAAGCGCTGCTCCATTTATTA           | 90-1529           | 159-428                         | BTB               | TFGMS709                              | 55.2                              | 143                            | 3                                                          | P                                                     | NSA                                                                                                     |
| PUIID16585683  | Ca4         | 42629317                | (AAC)4                       | 12                                | CCACAGGACACAGATAGTAGC            | CTGACCTTACAACAACCTCTG            | 68-1096           | 176-427                         | Myb DNA binding   | TFGMS710                              | 54.9                              | 166                            | 2                                                          | P                                                     | NSA                                                                                                     |
| PUIID16585684  | Ca1         | 37689960                | (TC)7                        | 14                                | TGAGAACAGACAGAGTCAC              | GTGTTATTGTTGGACCTCAAG            | 19-1119           | 856-1010                        | Myb DNA binding   | TFGMS711                              | 55.3                              | 144                            | 4                                                          | P                                                     | NSA                                                                                                     |
| PUIID16585685  | Ca4         | 5081434                 | (AAT)7                       | 21                                | GTAGTGACAGATAAATGCAAGG           | CAAGTTCAGTAAACAACCCGATA          | 135-1787          | 1365-1622                       | Myb DNA binding   | TFGMS712                              | 55.2                              | 141                            | 3                                                          | P                                                     | NSA                                                                                                     |
| PUIID16585686  | Ca4         | 5081312                 | (ATA)10                      | 30                                | CGGTTGTTACTGAACCTTGA             | GGTTGAACTTGAAGTGGTATT            | 135-1787          | 1365-1622                       | Myb DNA binding   | TFGMS713                              | 55.6                              | 150                            | 3                                                          | P                                                     | NSA                                                                                                     |
| PUIID16585687  | Ca3         | 21774818                | (AAC)8                       | 24                                | ACACACTTCAAGAACTTCCA             | GATCTGTTGTTGTTGATGGTT            | 110-1948          | 854-1906                        | GRAS              | TFGMS714                              | 54.9                              | 150                            | 2                                                          | P                                                     | NSA                                                                                                     |
| PUIID16585688  | Ca4         | 5571877                 | (CAA)4                       | 12                                | GACTATTCAATCACTGGTCA             | TTGAAATCAGTTACCTTCTCG            | 54-1457           | 855-1348                        | UDPGT             | TFGMS715                              | 55.1                              | 159                            | 2                                                          | P                                                     | NSA                                                                                                     |
| PUIID16585689  | Ca7         | 20231155                | (TAT)6                       | 18                                | GGTTTGTCCCTTTTACTTGT             | ACGTCTTCAAAATAGGGAAT             | 258-980           | 490-761                         | K-Box             | TFGMS716                              | 55.0                              | 141                            | 3                                                          | P                                                     | NSA                                                                                                     |
| PUIID16585690  | Ca6         | 55332933                | (AAT)12                      | 36                                | AACAAGTAGGTGTTGGAATGA            | GGTTTGTGCTTGATAAGAAA             | 522-1952          | 1269-1388                       | HomeoBox          | TFGMS717                              | 54.7                              | 168                            | 6                                                          | P                                                     | NSA                                                                                                     |
| PUIID16585691  | Ca6         | 20514111                | (TTGATA)3                    | 18                                | GTGGAAGTGAATTCAAGTGAG            | GTCCAACACCATAAATCATAT            | 775-1506          | 835-1002                        | SET               | TFGMS718                              | 54.8                              | 148                            | 3                                                          | P                                                     | NSA                                                                                                     |
| PUIID16585692  | Ca4         | 41865183                | (CAG)4                       | 12                                | AATTAAGGCTAGGGAACAACA            | GAGATGAGCCCTATCCCTAC             | 287-3016          | 2270-2383                       | WD40              | TFGMS719                              | 55.7                              | 143                            | 2                                                          | P                                                     | NSA                                                                                                     |
| PUIID16585693  | Ca3         | 38759963                | (AAT)11                      | 33                                | GGTCTTCATCATCAACTTCA             | ATCATGCTTGGCTTGAGAAG             | 102-1280          | 473-1259                        | bZIP              | TFGMS720                              | 55.2                              | 141                            | 2                                                          | P                                                     | NSA                                                                                                     |
| PUIID16585694  | Ca4         | 4799331                 | (TTG)4                       | 12                                | GCACTAAATGCGTTAAGAAA             | TGCGTTTCTCTTTAGTGCTTA            | 159-3803          | 2883-3098                       | Helicase          | TFGMS721                              | 55.1                              | 144                            | 2                                                          | P                                                     | NSA                                                                                                     |
| PUIID16585695  | Ca2         | 10253324                | (AAC)7                       | 21                                | CAGTATCATGATTTTTCGGTGT           | GTGGTGTGCTGATTGAGAGA             | 163-1092          | 448-582                         | Myb DNA binding   | TFGMS722                              | 55.1                              | 119                            | 2                                                          | P                                                     | NSA                                                                                                     |
| PUIID16585696  | Ca4         | 26511560                | (CAGCAA)4                    | 24                                | ACAGCAACAGCAACAACAG              | TTGAATGTGTGGATGTTGTG             | 180-2873          | 2505-2609                       | WD40              | TFGMS723                              | 55.8                              | 153                            | 4                                                          | P                                                     | NSA                                                                                                     |
| PUIID16585697  | Ca2         | 18879056                | (AT)6                        | 12                                | TAATGGATGCTCCTTCTTTT             | CTATGGAATTTCTCATGGTTG            | 217-1842          | 1267-1410                       | HLH               | TFGMS724                              | 55.7                              | 173                            | 3                                                          | P                                                     | NSA                                                                                                     |
| PUIID16585698  | 0           | 0                       | (GTG)6                       | 18                                | TTCCGTAAATCATCATATCGT            | ATTCTCAATCTCCCGTGA               | 329-1825          | 1220-1480                       | Myb DNA binding   | TFGMS725                              | 54.8                              | 147                            | 2                                                          | P                                                     | NSA                                                                                                     |
| PUIID16585699  | 0           | 0                       | (GAG)4                       | 12                                | AGGCTTCCTTGAGGATATTTA            | AAATTGCACAAACAGTATG              | 83-1732           | 149-529                         | DNMT1-RFD         | TFGMS726                              | 54.9                              | 149                            | 2                                                          | P                                                     | NSA                                                                                                     |
| PUIID16585700  | Ca3         | 20508952                | (CTTT)3                      | 12                                | CCTAAATTCAAATCAGCTCAA            | CTCAGTAGTTGGAGAAGCAAA            | 89-1681           | 1172-1348                       | WRKY              | TFGMS727                              | 54.8                              | 150                            | 2                                                          | P                                                     | NSA                                                                                                     |
| PUIID16585701  | Ca1         | 203312                  | (TTA)8                       | 24                                | TGATGATTATTTCGTTTCTCT            | GCAACTAGAAGACGCTGATAA            | 238-2373          | 1387-1563                       | RRM               | TFGMS728                              | 54.4                              | 152                            | 4                                                          | P                                                     | NSA                                                                                                     |
| PUIID16585702  | Ca1         | 10712885                | (AGC)4                       | 12                                | CTTTTAGCTGCACACAGCTTT            | CTCTCATTTTCAAATCACCTG            | 165-1457          | 875-995                         | bZIP              | TFGMS729                              | 55.1                              | 190                            | 4                                                          | P                                                     | NSA                                                                                                     |
| PUIID16585703  | Ca7         | 6057942                 | (CT)10                       | 20                                | ATTCTCCTCATAAGCCATTCT            | TTCTCGATCTATACGTCAACC            | 586-1209          | 937-1101                        | KNOXZ             | TFGMS730                              | 54.7                              | 150                            | 4                                                          | P                                                     | NSA                                                                                                     |
| PUIID16585704  | Ca3         | 28289003                | (AG)10                       | 20                                | GATTAATGGTTGTGATGAGGA            | GTAATTAACCGTTTGTGTCG             | 835-1743          | 1282-1434                       | Myb DNA binding   | TFGMS731                              | 55.0                              | 144                            | 6                                                          | P                                                     | NSA                                                                                                     |
| PUIID16585705  | Ca3         | 28287606                | (TAT)6                       | 12                                | AACATAGTGTGTTGGCAACT             | CACATCCAACTGTTGTTCTC             | 835-1743          | 1282-1434                       | Myb DNA binding   | TFGMS732                              | 54.8                              | 144                            | 3                                                          | P                                                     | NSA                                                                                                     |
| PUIID16585706  | Ca4         | 19324                   | (AAG)7                       | 21                                | TCCATGCTGATTGTTGAGTGTA           | GTTTCAGATTAAACGGTGTG             | 216-1859          | 441-683                         | bZIP              | TFGMS733                              | 54.9                              | 151                            | 2                                                          | P                                                     | NSA                                                                                                     |
| PUIID16585707  | 0           | 0                       | (AG)7                        | 14                                | TTAAGTGAACACTGAGGCAAC            | GTGAGTGAGAACTCGAAGATGA           | 450-4657          | 1209-1871                       | START             | TFGMS734                              | 54.8                              | 145                            | 4                                                          | P                                                     | NSA                                                                                                     |
| PUIID16585708  | Ca7         | 6116635                 | (TAA)4                       | 12                                | TAGTTTCAGCTCAGGAATTG             | CTGCATCATTTTCTCAACAT             | 252-1391          | 378-1127                        | PP2C              | TFGMS735                              | 54.9                              | 151                            | 3                                                          | P                                                     | NSA                                                                                                     |
| PUIID16585709  | Ca4         | 9449960                 | (TTG)5                       | 15                                | TACTACTTCACTTGGCTTTTG            | AGGGTAGAAACATGGAAAAAG            | 138-1349          | 828-983                         | Myb DNA binding   | TFGMS736                              | 54.8                              | 178                            | 2                                                          | P                                                     | NSA                                                                                                     |
| PUIID16585710  | 0           | 0                       | (TTT)3                       | 12                                | CATTGTTGGATTGTGAAGTT             | TCATACAAAACCTTCTCAAA             | 315-1658          | 666-929                         | Myb DNA binding   | TFGMS737                              | 55.2                              | 159                            | 2                                                          | P                                                     | NSA                                                                                                     |
| PUIID16585711  | Ca3         | 26594514                | (ACA)7                       | 21                                | TTTCAGTGTTTGTGGAAGACT            | CCTCTTGTGTTGAATTAAGACT           | 99-923            | 702-809                         | GATA              | TFGMS738                              | 54.9                              | 146                            | 4                                                          | P                                                     | NSA                                                                                                     |
| PUIID16585712  | Ca4         | 22197042                | (AG)8                        | 16                                | CATGATTGTTATGGTGGTCTT            | GTCAACCACTTCAAGTTCCAA            | 1-1302            | 853-1101                        | Myb DNA binding   | TFGMS739                              | 54.9                              | 150                            | 3                                                          | P                                                     | NSA                                                                                                     |
| PUIID16585713  | Ca1         | 3235738                 | (GGAAAT)3                    | 18                                | ATAATGGTACTTTCGGAGGA             | TCTTCTCGTGTTCATGTTCT             | 178-1098          | 232-504                         | Myb DNA binding   | TFGMS740                              | 55.4                              | 151                            | 2                                                          | P                                                     | NSA                                                                                                     |
| PUIID16585714  | Ca5         | 31194921                | (ATG)6                       | 18                                | CATGAAGGCCTATAACAGAA             | GAGCTTCTACTCGTCATCATC            | 243-563           | 375-455                         | HMG Box           | TFGMS741                              | 54.7                              | 145                            | 2                                                          | P                                                     | NSA                                                                                                     |

| NCBI Probe IDs | Chromosomes | Physical positions (bp) | Microsatellite repeat-motifs | Microsatellite repeat length (bp) | Forward Primer sequences (5'-3') | Reverse Primer sequences (5'-3') | ORF position (bp) | Functional domain position (bp) | Functional domain | Types of genic microsatellite markers | Actual annealing temperature (°C) | Size (bp) of alleles amplified | Total number of alleles amplified among chickpea varieties | Polymorphic potential monomorphic (M)/polymorphic (P) | R2 value of marker loci showing significant association ( $P \leq 0.05$ ) with three major seed and pod traits |
|----------------|-------------|-------------------------|------------------------------|-----------------------------------|----------------------------------|----------------------------------|-------------------|---------------------------------|-------------------|---------------------------------------|-----------------------------------|--------------------------------|------------------------------------------------------------|-------------------------------------------------------|----------------------------------------------------------------------------------------------------------------|
| PUID16585715   | Ca7         | 24022020                | (CT)6                        | 12                                | TCAACCCCTACAACAGCTTCATC          | ATTTCCAAGTGCTAAAAGCAT            | 206-1216          | 356-535                         | Z1-HD-dimer       | TFGMS742                              | 55.1                              | 132                            | 3                                                          | P                                                     | NSA                                                                                                            |
| PUID16585716   | Ca7         | 24021097                | (TTGGAA)3                    | 18                                | ATGATGTTGGTGTTTCAAGAG            | TTTAGCATCTGGATCTATGGT            | 206-1216          | 356-535                         | Z1-HD-dimer       | TFGMS743                              | 55.1                              | 159                            | 2                                                          | P                                                     | NSA                                                                                                            |
| PUID16585717   | Ca6         | 15107755                | (TTCCCA)3                    | 18                                | ATTTCATTCTATGCGCTTTTC            | AACCATTAACTCGTTTTCACA            | 222-1244          | 750-863                         | GATA              | TFGMS744                              | 55.1                              | 150                            | 2                                                          | P                                                     | NSA                                                                                                            |
| PUID16585718   | Ca7         | 34922983                | (TAA)14                      | 42                                | CAAACCTCACTTTCAGCTCTTG           | GTTATGCATCTGATGGTGAAC            | 88-903            | 144-324                         | Z1-Dof            | TFGMS745                              | 55.4                              | 154                            | 4                                                          | P                                                     | NSA                                                                                                            |
| PUID16585719   | Ca6         | 26358709                | (AGAA)5                      | 20                                | GTGATCTGTCTATCGTTTCAAT           | AGGAAGCTTTGAGAAAGAGAA            | 361-1638          | 1465-1638                       | GRAS              | TFGMS746                              | 55.0                              | 141                            | 2                                                          | P                                                     | NSA                                                                                                            |
| PUID16585720   | Ca6         | 26357925                | (TAG)7                       | 21                                | AAGCCTCTATATTGCAAAACC            | CAAAATCCATCCCTAGAACCT            | 361-1638          | 1465-1638                       | GRAS              | TFGMS747                              | 55.4                              | 146                            | 3                                                          | P                                                     | NSA                                                                                                            |
| PUID16585721   | 0           | 0                       | (AGAA)3                      | 12                                | GATGAGAAAATCCAAGAGGTC            | GAGTCTCTCAATTCTCTTTTGG           | 106-549           | 214-321                         | GATA              | TFGMS748                              | 55.3                              | 150                            | 2                                                          | P                                                     | NSA                                                                                                            |
| PUID16585722   | Ca4         | 46398833                | (AGATGA)3                    | 18                                | CGATGAATTCAAGAAGCAATA            | TGAACCTAAACAAATCTTGA             | 149-540           | 158-303                         | AP2               | TFGMS749                              | 55.7                              | 159                            | 2                                                          | P                                                     | NSA                                                                                                            |
| PUID16585723   | Ca5         | 29786484                | (AC)7                        | 14                                | GAAGAGGTGGAGAAAGATCC             | AGCCAAAAGAACAAAGAGAA             | 362-4102          | 764-1159                        | AAA               | TFGMS750                              | 55.3                              | 132                            | 3                                                          | P                                                     | NSA                                                                                                            |
| PUID16585724   | Ca5         | 29786557                | (TGT)4                       | 12                                | AGAAGAAGGAGGTTTGTATC             | CTTTCTGTGTGTGTGTGTGTC            | 362-4102          | 764-1159                        | AAA               | TFGMS751                              | 55.0                              | 159                            | 2                                                          | P                                                     | NSA                                                                                                            |
| PUID16585725   | Ca5         | 29786541                | (TTC)5                       | 15                                | TGATCGGAAGAAAGAAAGAT             | TTCTTTCCCTTTCTTTCCCTTTC          | 362-4102          | 764-1159                        | AAA               | TFGMS752                              | 55.7                              | 169                            | 2                                                          | P                                                     | NSA                                                                                                            |
| PUID16585726   | Ca2         | 17282543                | (CAA)7                       | 21                                | ATGCCTTCAAGTTTCAACAC             | TCGTATTGTGTTGTTGTTTG             | 86-1189           | 701-847                         | HLH               | TFGMS753                              | 55.3                              | 148                            | 3                                                          | P                                                     | NSA                                                                                                            |
| PUID16585727   | Ca6         | 23263526                | (ATTG)3                      | 12                                | GTGGTTCCTATGATTGTTTG             | GGGTTAATTACAAACCATCC             | 141-1481          | 384-1448                        | GRAS              | TFGMS754                              | 54.7                              | 149                            | 2                                                          | P                                                     | NSA                                                                                                            |
| PUID16585728   | Ca7         | 8795456                 | (TAA)8                       | 24                                | AAATGGATTGAAGGAATCAGT            | TCGAACCATTTGTA AAAACAC           | 271-909           | 529-690                         | HomeoBox          | TFGMS755                              | 55.2                              | 153                            | 3                                                          | P                                                     | NSA                                                                                                            |
| PUID16585729   | Ca1         | 20106435                | (TAA)7                       | 21                                | TGAGATAATGGAGCTTGAATC            | AGCTTGTGGAAGTGACACAGT            | 108-692           | 276-401                         | HLH               | TFGMS756                              | 54.5                              | 152                            | 4                                                          | P                                                     | NSA                                                                                                            |
| PUID16585730   | Ca4         | 32780320                | (ATGGT)3                     | 15                                | TCCCATCAAGATGCTAAAAAT            | AATCAATCTTTGAGTTGTTGC            | 710-1126          | 684-1096                        | AUX_1AA           | TFGMS757                              | 55.0                              | 149                            | 2                                                          | P                                                     | NSA                                                                                                            |
| PUID16585731   | Ca3         | 31978552                | (GCT)4                       | 12                                | GATGAGTATGGAATGGGAAT             | AGATGATGATGAATCCAGAT             | 169-1638          | 894-1122                        | HLH               | TFGMS758                              | 55.4                              | 151                            | 3                                                          | P                                                     | NSA                                                                                                            |
| PUID16585732   | Ca1         | 4865629                 | (CTGATT)4                    | 24                                | CGCAGATTATATCTCACGGTA            | ATTCTCCAAATCTTCAGGTTC            | 22-1449           | 604-771                         | BSD               | TFGMS759                              | 55.6                              | 148                            | 2                                                          | P                                                     | NSA                                                                                                            |
| PUID16585733   | Ca8         | 4628420                 | (GAA)8                       | 24                                | TCTTTGGGACATAGAATTGAA            | GAAGCCAATGGTAGAAGAAAT            | 105-2279          | 918-1322                        | POX               | TFGMS760                              | 54.9                              | 149                            | 3                                                          | P                                                     | NSA                                                                                                            |
| PUID16585734   | Ca3         | 39742820                | (GA)16                       | 32                                | AGGTTGGTTGCTCTTAAGTTGA           | TTTCTGCTCACCTTGATCTTC            | 163-2043          | 1608-1944                       | Response          | TFGMS761                              | 54.0                              | 149                            | 6                                                          | P                                                     | NSA                                                                                                            |
| PUID16585735   | Ca3         | 1482592                 | (TA)10                       | 20                                | TTTCTTGTCCATGCAATTACT            | ATGTTTCAAAATTAAGGCAGA            | 10-567            | 256-387                         | Myb DNA binding   | TFGMS762                              | 55.0                              | 146                            | 3                                                          | P                                                     | NSA                                                                                                            |
| PUID16585736   | Ca3         | 30954905                | (ACCTTC)3                    | 18                                | GAGAAGGGGACTGTGAACCTAC           | GTTGAAGGTTGAAGAAGAAA             | 225-1850          | 289-542                         | Bromodomain       | TFGMS763                              | 55.4                              | 162                            | 3                                                          | P                                                     | NSA                                                                                                            |
| PUID16585737   | Ca1         | 1953808                 | (CT)8                        | 16                                | GCCATTCTTCACTCTTTCTTT            | GTTCAAATCCGAAACGTAAT             | 163-2832          | 1186-1491                       | B3                | TFGMS764                              | 55.3                              | 148                            | 4                                                          | P                                                     | NSA                                                                                                            |
| PUID16585738   | Ca1         | 1953808                 | (TQ)8                        | 16                                | GCCATTCTTCACTCTTTCTTT            | GTTCAAATCCGAAACGTAAT             | 163-2832          | 1186-1491                       | B3                | TFGMS765                              | 55.3                              | 148                            | 4                                                          | P                                                     | NSA                                                                                                            |
| PUID16585739   | Ca2         | 34852663                | (AGA)8                       | 24                                | TGAAGAAGGAGGAGGAAGAGG            | GAATCAACCTTTTGTGCCATTA           | 257-2983          | 854-1102                        | Bromodomain       | TFGMS766                              | 55.5                              | 153                            | 4                                                          | P                                                     | NSA                                                                                                            |
| PUID16585740   | Ca4         | 24593381                | (AAG)5                       | 15                                | CATCCAAGACAATAATTCCTTA           | CTCTGGAATTTTAAACAAGCA            | 150-1937          | 1392-1751                       | BTB               | TFGMS767                              | 54.5                              | 158                            | 2                                                          | P                                                     | NSA                                                                                                            |
| PUID16585741   | Ca1         | 5668632                 | (AG)6                        | 12                                | GTAGAAAAGGGAGAGATGGAA            | TAACGTCTCCAAAATCTCAA             | 2164-5712         | 3577-3960                       | APG6              | TFGMS768                              | 55.1                              | 159                            | 4                                                          | P                                                     | NSA                                                                                                            |
| PUID16585742   | Ca1         | 5668632                 | (AG)8                        | 16                                | GTAGAAAAGGGAGAGATGGAA            | TAACGTCTCCAAAATCTCAA             | 2164-5712         | 3577-3960                       | APG6              | TFGMS769                              | 55.1                              | 159                            | 2                                                          | P                                                     | NSA                                                                                                            |
| PUID16585743   | Ca6         | 12437200                | (CAA)5                       | 15                                | CTCAAACTCAATCACATTTCC            | GCTGTTGTGATTTTGTGTTT             | 932-3685          | 1307-1615                       | B3                | TFGMS770                              | 54.8                              | 153                            | 2                                                          | P                                                     | NSA                                                                                                            |
| PUID16585744   | Ca6         | 19840998                | (CTA)6                       | 18                                | GAAATTCAATCTGAACATCA             | TTGTCAACATCTCACAGAAGAA           | 219-1424          | 1095-1271                       | WRKY              | TFGMS771                              | 55.1                              | 146                            | 3                                                          | P                                                     | NSA                                                                                                            |
| PUID16585745   | Ca8         | 5569895                 | (TTGAG)4                     | 20                                | AATCCAATCGAAGAGAGAGAG            | AGTTACCATCTCAATCCACAG            | 149-3886          | 1601-1738                       | GVF               | TFGMS772                              | 55.3                              | 154                            | 2                                                          | P                                                     | NSA                                                                                                            |
| PUID16585746   | Ca6         | 2782209                 | (TATTTT)4                    | 24                                | AGATGAGGAAGAGGAAAATGA            | ATCGTTGTCCCTTCATTGATA            | 163-1038          | 163-888                         | mTERF             | TFGMS773                              | 55.5                              | 150                            | 2                                                          | P                                                     | NSA                                                                                                            |
| PUID16585747   | Ca7         | 10115566                | (TGAATT)4                    | 24                                | TGAACATTCGCCCTTAGGAAC            | GAAGTTGATGAGTTTGTATCG            | 235-1188          | 742-897                         | AP2               | TFGMS774                              | 55.0                              | 153                            | 3                                                          | P                                                     | NSA                                                                                                            |
| PUID16585748   | Ca6         | 12572480                | (GCA)7                       | 21                                | GGTGAAATCAGAATCATCAC             | CCAACCTGGTTTCTCCTCTTA            | 840-2244          | 1029-1292                       | TCP               | TFGMS775                              | 54.7                              | 157                            | 3                                                          | P                                                     | NSA                                                                                                            |
| PUID16585749   | Ca4         | 8051984                 | (ACCCT)5                     | 25                                | TTTCTTAAACGACATCTTCAAC           | CTTCTCTGCTGCTCATCTCA             | 257-1462          | 278-1124                        | Tub               | TFGMS776                              | 54.5                              | 153                            | 5                                                          | P                                                     | NSA                                                                                                            |
| PUID16585750   | Ca4         | 8052130                 | (ATG)7                       | 21                                | GAAACTGAGCACTAGGAGTTG            | CAGTTTCTTCCACAAAAGCTA            | 257-1462          | 278-1124                        | Tub               | TFGMS777                              | 54.3                              | 169                            | 3                                                          | P                                                     | NSA                                                                                                            |
| PUID16585751   | Ca2         | 34273833                | (AAT)7                       | 21                                | TTCTCTCTTCCATGGCTAAT             | CATTGAAACTGTATGAGAAGG            | 37-972            | 529-709                         | WRKY              | TFGMS778                              | 55.7                              | 154                            | 2                                                          | P                                                     | NSA                                                                                                            |
| PUID16585752   | 0           | 0                       | (TQ)12                       | 24                                | GTAAACCCCAAGTTGAGAGTTT           | TGCTTTGTAGTGAGTGTTGT             | 554-1651          | 1073-1219                       | HLH               | TFGMS779                              | 55.0                              | 147                            | 4                                                          | P                                                     | NSA                                                                                                            |
| PUID16585753   | Ca7         | 10016192                | (TTG)4                       | 12                                | GTGCAGTTTGACATCTACCTA            | TGACCAAAGTAAACACCACT             | 227-1240          | 521-655                         | Myb DNA binding   | TFGMS780                              | 54.7                              | 166                            | 3                                                          | P                                                     | NSA                                                                                                            |
| PUID16585754   | Ca2         | 2409848                 | (AG)11                       | 22                                | TGAGAAAATATGACACACAAAG           | ACATATTCTGCTGTTGTTCC             | 423-1283          | 627-788                         | HomeoBox          | TFGMS781                              | 55.0                              | 143                            | 6                                                          | P                                                     | NSA                                                                                                            |
| PUID16585755   | Ca4         | 13721224                | (AT)6                        | 12                                | TAGTCAATGGTCCTTGAAG              | AAACTGCTTTCCTGTTGTATG            | 517-4470          | 2197-2277                       | PHD               | TFGMS782                              | 54.6                              | 163                            | 3                                                          | P                                                     | NSA                                                                                                            |
| PUID16585756   | Ca2         | 26834137                | (CAA)4                       | 12                                | AAAACAACAACCTTCTCAATGC           | ACCTTCAACTCTCCATCTTTT            | 21-1746           | 1251-1427                       | WRKY              | TFGMS783                              | 54.6                              | 155                            | 2                                                          | P                                                     | NSA                                                                                                            |
| PUID16585757   | Ca8         | 15607448                | (TCC)4                       | 12                                | TAAATCGCCTAGGATGTTCA             | CATAACTTGTTCGGAGCTTGT            | 209-886           | 377-472                         | AP2               | TFGMS784                              | 55.2                              | 155                            | 2                                                          | P                                                     | NSA                                                                                                            |
| PUID16585758   | Ca7         | 19466375                | (TCTCTT)3                    | 18                                | TGTGTTTGTGTTTAAGAGCA             | GGTGTGTAGCAGAGAAGAGA             | 239-1300          | 437-1273                        | AUX-1AA           | TFGMS785                              | 54.6                              | 142                            | 2                                                          | P                                                     | NSA                                                                                                            |
| PUID16585759   | Ca4         | 21853025                | (CAC)4                       | 12                                | CTTTAGGGAATGTGTGCTTAA            | TGTTGTAAATGTTGTGTTTG             | 132-1655          | 504-764                         | Myb DNA binding   | TFGMS786                              | 54.8                              | 151                            | 2                                                          | P                                                     | NSA                                                                                                            |
| PUID16585760   | Ca2         | 7604070                 | (TC)6                        | 12                                | CCCTAGAACATGATGAAGAA             | CCTTCAAGAGAGAGAGAGACC            | 145-924           | 328-495                         | Z1-HD             | TFGMS787                              | 54.5                              | 165                            | 2                                                          | P                                                     | NSA                                                                                                            |
| PUID16585761   | Ca5         | 9961692                 | (TGC)5                       | 15                                | ATTGATGATGAACCATATTGC            | ACAACAACAACATCAACAACA            | 88-1548           | 1231-1487                       | WRKY              | TFGMS788                              | 54.9                              | 144                            | 3                                                          | P                                                     | NSA                                                                                                            |
| PUID16585762   | Ca8         | 7165244                 | (CT)6                        | 12                                | AGAGAACCCAATACCAAAAAC            | CTGACGCAATAGCGTTCTT              | 99-491            | 249-479                         | SWIB              | TFGMS789                              | 54.9                              | 174                            | 3                                                          | P                                                     | NSA                                                                                                            |
| PUID16585763   | Ca1         | 11285919                | (TAT)8                       | 24                                | AGAAGAATCCAAATCCAAAAC            | GAAGCCTCTTCTCCTGATAC             | 337-2598          | 349-1467                        | GRAS              | TFGMS790                              | 55.0                              | 148                            | 3                                                          | P                                                     | NSA                                                                                                            |
| PUID16585764   | Ca7         | 19621697                | (AG)11                       | 22                                | GGAGAGTTGTTGTTTGAAG              | CACCTGAAATAAATCACCAAC            | 33-2006           | 426-566                         | HLH               | TFGMS791                              | 54.6                              | 144                            | 4                                                          | P                                                     | NSA                                                                                                            |
| PUID16585765   | 0           | 0                       | (TGT)5                       | 15                                | AGATTCTTCATTGTTGCGATA            | TGGATTCAACAAGTATTGGAC            | 91-1293           | 175-312                         | HLH               | TFGMS792                              | 54.9                              | 140                            | 3                                                          | P                                                     | NSA                                                                                                            |
| PUID16585766   | Ca6         | 15271372                | (TA)8                        | 16                                | TCTAAAGAGTCTCCCTCAGAAA           | AATCACTTCCCTGAAGAACTCC           | 237-1841          | 468-1132                        | Bromodomain       | TFGMS793                              | 55.1                              | 141                            | 4                                                          | P                                                     | NSA                                                                                                            |
| PUID16585767   | Ca1         | 12928971                | (CT)9                        | 27                                | TAAAGTTGTGGCTGTGAGAGAT           | TATTGAGATTCTCGTGCACAC            | 267-1541          | 762-914                         | Myb DNA binding   | TFGMS794                              | 55.0                              | 157                            | 3                                                          | P                                                     | NSA                                                                                                            |
| PUID16585768   | Ca8         | 8417363                 | (TTA)6                       | 18                                | GCTTAAGCTTGTGTTGTTTG             | CAACAACAACATCATCAAAACA           | 363-1553          | 747-902                         | Myb DNA binding   | TFGMS795                              | 55.5                              | 150                            | 2                                                          | P                                                     | NSA                                                                                                            |
| PUID16585769   | Ca7         | 34320789                | (ATG)4                       | 12                                | CTTCTCCATCAACAACAATC             | CTTGTTCCTCAAGTGACAAATC           | 712-1293          | 832-1122                        | B3                | TFGMS796                              | 54.8                              | 161                            | 3                                                          | P                                                     | NSA                                                                                                            |
| PUID16585770   | Ca2         | 34653566                | (GAA)7                       | 21                                | AGCAAGAAGAAGAAGAGGAA             | CTTCTCTTTTGTATGGTGTG             | 712-1293          | 832-1122                        | B3                | TFGMS797                              | 55.2                              | 143                            | 2                                                          | P                                                     | NSA                                                                                                            |
| PUID16585771   | Ca2         | 34095011                | (CAT)5                       | 15                                | CACCACTCTTTGAGTTTCATC            | TGGTTGAGGAAGTTATGTTGT            | 269-2008          | 461-685                         | BTB               | TFGMS798                              | 54.8                              | 150                            | 2                                                          | P                                                     | NSA                                                                                                            |
| PUID16585772   | Ca6         | 14811478                | (GA)16                       | 32                                | AGTCAATCCGTAGAAGAAGC             | CAAGAAGAAGTTTCAAGATCG            | 279-3524          | 1269-1346                       | Ank               | TFGMS799                              | 55.4                              | 145                            | 4                                                          | P                                                     | NSA                                                                                                            |
| PUID16585773   | Ca6         | 20762882                | (TTTA)3                      | 12                                | GGTAAAGTTGCTTGGTTAAAG            | ATCATCACCATTCAACCTTAC            | 162-875           | 492-641                         | HLH               | TFGMS800                              | 55.7                              | 151                            | 2                                                          | P                                                     | NSA                                                                                                            |
| PUID16585774   | Ca2         | 10330535                | (AG)9                        | 18                                | GGAGAATTGGCATAAAATG              | CTCTCGAGGTAGGTGTGTTTA            | 252-1031          | 465-943                         | HLH               | TFGMS801                              | 54.8                              | 154                            | 4                                                          | P                                                     | NSA                                                                                                            |
| PUID16585775   | Ca2         | 32867739                | (GAA)11                      | 33                                | CAAGTGAATGAATCTCAAGC             | CTCTCTTCTCTCATCTTCC              | 344-1408          | 907-1416                        | EIN3              | TFGMS802                              | 55.1                              | 152                            | 2                                                          | P                                                     | NSA                                                                                                            |
| PUID16585776   | Ca4         | 13652216                | (TGG)6                       | 18                                | GTCGTGGGAGAAATAGTCTTC            | CTCAAAATCTCTGCCAACCT             | 210-875           | 318-503                         | ovate             | TFGMS803                              | 55.6                              | 153                            | 2                                                          | P                                                     | NSA                                                                                                            |

| NCBI Probe IDs | Chromosomes | Physical positions (bp) | Microsatellite repeat-motifs | Microsatellite repeat length (bp) | Forward Primer sequences (5'-3') | Reverse Primer sequences (5'-3') | ORF position (bp) | Functional domain position (bp) | Functional domain | Types of genic microsatellite markers | Actual annealing temperature (°C) | Size (bp) of alleles amplified | Total number of alleles amplified among chickpea varieties | Polymorphic potential monomorphic (M)/polymorphic (P) | R2 value of marker loci showing significant association (P ≤ 0.05) with three major seed and pod traits |
|----------------|-------------|-------------------------|------------------------------|-----------------------------------|----------------------------------|----------------------------------|-------------------|---------------------------------|-------------------|---------------------------------------|-----------------------------------|--------------------------------|------------------------------------------------------------|-------------------------------------------------------|---------------------------------------------------------------------------------------------------------|
| PUIID16585777  | Ca1         | 15378933                | (AAT)7                       | 21                                | ACCTTATCAATGATTGCTTCA            | CAAGACAAAGAGGAAATTGTG            | 3-953             | 387-533                         | HLH               | TFGMS804                              | 54.9                              | 154                            | 2                                                          | P                                                     | NSA                                                                                                     |
| PUIID16585778  | Ca7         | 19942079                | (TTQ)7                       | 21                                | AGTGATTCTGCTGTGCTCTGCG           | AGAATTAGAAACCGCAATGTT            | 220-1137          | 682-837                         | HLH               | TFGMS805                              | 54.5                              | 155                            | 3                                                          | P                                                     | NSA                                                                                                     |
| PUIID16585779  | Ca4         | 48201455                | (TTQ)4                       | 12                                | GATGGTGAAGAGAGAGTGTT             | CTCTCTAAGTAGCGGAGAGGG            | 1-251             | 78-227                          | DUF702            | TFGMS806                              | 55.8                              | 152                            | 2                                                          | P                                                     | NSA                                                                                                     |
| PUIID16585780  | Ca2         | 2580068                 | (AG)6                        | 12                                | TCAAAATAGTCTTCTCCTTTGG           | CAATCTCAGACCTTAGTGTGC            | 527-5338          | 647-961                         | BAH               | TFGMS807                              | 53.9                              | 155                            | 4                                                          | P                                                     | NSA                                                                                                     |
| PUIID16585781  | Ca7         | 28550286                | (TC)7                        | 14                                | GCGETTAAAAGATCTCACTTT            | TGTTTTGTCTGGTACTTGAT             | 786-1760          | 975-1211                        | SBP               | TFGMS808                              | 55.7                              | 148                            | 3                                                          | P                                                     | NSA                                                                                                     |
| PUIID16585782  | Ca7         | 28550154                | (TC)9                        | 18                                | TTGAGAAACGAGAGCAGACTA            | ACTCACACTTGCACCTCTCACT           | 786-1760          | 975-1211                        | SBP               | TFGMS809                              | 55.5                              | 161                            | 3                                                          | P                                                     | NSA                                                                                                     |
| PUIID16585783  | Ca4         | 30264977                | (CT)11                       | 22                                | TCTCTCATCTCTCTTTCTTTCC           | GATCCAAAGAATGGAATAACC            | 234-1139          | 756-944                         | KH1               | TFGMS810                              | 55.2                              | 147                            | 4                                                          | P                                                     | NSA                                                                                                     |
| PUIID16585784  | Ca8         | 14954627                | (TGT)5                       | 15                                | TTCAATACCGTCTTCACTCTC            | ATGAAGATGATGATTTCGATG            | 221-1375          | 713-976                         | Myb DNA binding   | TFGMS811                              | 54.5                              | 151                            | 4                                                          | P                                                     | NSA                                                                                                     |
| PUIID16585785  | Ca2         | 10253324                | (AAC)7                       | 21                                | CAGTATCATGATTTTCGGTGT            | GTGGTGTTCGTATTGGAGAGA            | 210-664           | 495-629                         | Myb DNA binding   | TFGMS812                              | 55.1                              | 119                            | 2                                                          | P                                                     | NSA                                                                                                     |
| PUIID16585786  | Ca7         | 8015993                 | (TCA)4                       | 12                                | TGGTTTAAAGCAACCTAGTAA            | AGGTACCTGGTGGTGGTAAT             | 17-447            | 191-388                         | TCP               | TFGMS813                              | 54.4                              | 140                            | 3                                                          | P                                                     | NSA                                                                                                     |
| PUIID16585787  | Ca2         | 3410251                 | (TA)8                        | 16                                | AATGTTCTTCCCTCACTCTA             | ACTCCCAAACCTCTCAAGTAGC           | 52-321            | 103-264                         | Zi-HD             | TFGMS814                              | 55.5                              | 136                            | 3                                                          | P                                                     | NSA                                                                                                     |
| PUIID16585788  | Ca5         | 34474846                | (TGT)4                       | 12                                | TCTTAGTAAAGCATTGGTAA             | GAGACATACATACGCCATTAA            | 64-1329           | 355-505                         | lily              | TFGMS815                              | 55.2                              | 153                            | 3                                                          | P                                                     | NSA                                                                                                     |
| PUIID16585789  | Ca6         | 10053750                | (TGAT)4                      | 16                                | TGATTGTGGATTCTCGATAC             | TGGCGATTTAGATAGTGGTAA            | 706-1158          | 814-990                         | bZIP              | TFGMS816                              | 55.2                              | 150                            | 2                                                          | P                                                     | NSA                                                                                                     |
| PUIID16585790  | Ca2         | 11263883                | (TC)13                       | 26                                | CCACCACACAGAGAAAGAA              | GGTGGTGTGTAGTGTGTGA              | 470-1462          | 734-895                         | HomeoBox          | TFGMS817                              | 56.3                              | 148                            | 6                                                          | P                                                     | NSA                                                                                                     |
| PUIID16585791  | Ca5         | 35861292                | (CTC)7                       | 28                                | TCTAGAAGCTTCTCACTTCACC           | CGAAAGTGAGTGTGGAGAAAG            | 221-1324          | 359-637                         | HSF               | TFGMS818                              | 54.7                              | 163                            | 4                                                          | P                                                     | NSA                                                                                                     |
| PUIID16585792  | 0           | 0                       | (TC)15                       | 30                                | CCACCACCTACGTAATAATAA            | GTTTGAACCTCCCTGAAGAAT            | 144-1262          | 462-1238                        | Tub               | TFGMS819                              | 54.5                              | 171                            | 4                                                          | P                                                     | NSA                                                                                                     |
| PUIID16585793  | Ca7         | 12021104                | (ACACAA)4                    | 24                                | CCCTCTTATTTTTGTTCACAC            | TTCTTCGAAATGGAATAAG              | 129-1130          | 906-1088                        | WRKY              | TFGMS820                              | 54.9                              | 165                            | 3                                                          | P                                                     | NSA                                                                                                     |
| PUIID16585794  | 0           | 0                       | (GA)18                       | 36                                | GACATGGTTCGATTGGAT               | CACACTCACTCTCTCTTCTTCT           | 292-2019          | 664-840                         | WRKY              | TFGMS821                              | 55.7                              | 153                            | 6                                                          | P                                                     | NSA                                                                                                     |
| PUIID16585795  | Ca4         | 12176090                | (AAC)7                       | 21                                | CCCAAAACATCAACAATCTTA            | AGGGTCTAGAAAATTTGTTGG            | 107-2095          | 992-2092                        | GRAS              | TFGMS822                              | 55.3                              | 132                            | 2                                                          | P                                                     | NSA                                                                                                     |
| PUIID16585796  | Ca6         | 38814576                | (AG)12                       | 24                                | TACCACCTTTTATACCGTGCAC           | ATGAATGAACGAAATGTGACCT           | 243-2444          | 1365-2438                       | GRAS              | TFGMS823                              | 55.7                              | 145                            | 4                                                          | P                                                     | NSA                                                                                                     |
| PUIID16585797  | Ca5         | 46073597                | (ATT)7                       | 21                                | GTTTCCAGCAAAAGATTCTG             | ACCTCTAGCTCTCAGCTCCACT           | 92-2116           | 230-565                         | Response-reg      | TFGMS824                              | 55.0                              | 151                            | 3                                                          | P                                                     | NSA                                                                                                     |
| PUIID16585798  | Ca5         | 29398059                | (CCTCT)3                     | 18                                | AGTCTTCCAGCAATTCGAACC            | TTTTGAGGAAAGCTTCTAAGT            | 481-1458          | 892-987                         | AP2               | TFGMS825                              | 55.8                              | 152                            | 2                                                          | P                                                     | NSA                                                                                                     |
| PUIID16585799  | Ca6         | 9118284                 | (AG)10                       | 20                                | AGGTAGTTGAAGAACGAACC             | AGAAGCAGGATCAATACCTTT            | 198-1349          | 942-1085                        | bZIP              | TFGMS826                              | 55.1                              | 153                            | 5                                                          | P                                                     | NSA                                                                                                     |
| PUIID16585800  | Ca3         | 31064037                | (GA)10                       | 20                                | CCCTCGAAATGGGACTGTT              | AACACTTCCCCACACAAC               | 177-608           | 423-524                         | AP2               | TFGMS827                              | 55.0                              | 141                            | 5                                                          | P                                                     | NSA                                                                                                     |
| PUIID16585801  | Ca6         | 54244269                | (GTTGATA)3                   | 18                                | GTTCTATTCCAAATGCCATTAT           | ATGAGACCAGATAGGAAGAAGC           | 230-682           | 236-296                         | Myb               | TFGMS828                              | 55.0                              | 153                            | 3                                                          | P                                                     | NSA                                                                                                     |
| PUIID16585802  | Ca1         | 3651235                 | (AT)6                        | 12                                | TGATGATGATGATGATGACAG            | GACTTGAAAGTAAACACAGAGA           | 239-787           | 413-607                         | K-Box             | TFGMS829                              | 54.5                              | 153                            | 2                                                          | P                                                     | NSA                                                                                                     |
| PUIID16585803  | Ca2         | 11661488                | (ATC)4                       | 12                                | AGCAAAATTCATGCTACAAAC            | TCTCATGTCAATCTCGATGA             | 167-1003          | 386-547                         | HomeoBox          | TFGMS830                              | 54.8                              | 151                            | 2                                                          | P                                                     | NSA                                                                                                     |
| PUIID16585804  | Ca4         | 45736093                | (TTQ)6                       | 18                                | GCAGCTATTGATTCATCTTCT            | ATGTACCAAGCCATACTCTTG            | 141-692           | 543-608                         | AP2               | TFGMS831                              | 53.9                              | 158                            | 3                                                          | P                                                     | NSA                                                                                                     |
| PUIID16585805  | Ca4         | 12023919                | (CTCATC)4                    | 24                                | CCACCTAATCAAGGAAGCAAA            | AGTCGCTCTTATTGGACTTGT            | 2-511             | 152-253                         | S1FA              | TFGMS832                              | 54.8                              | 156                            | 3                                                          | P                                                     | NSA                                                                                                     |
| PUIID16585806  | Ca7         | 32855952                | (TTTGAT)6                    | 36                                | CAAGAAGGTGAAGTTAAAGCA            | ATTCAACCTCAGAGTTTCGAGA           | 125-1216          | 854-1030                        | WRC               | TFGMS833                              | 55.0                              | 155                            | 5                                                          | P                                                     | NSA                                                                                                     |
| PUIID16585807  | Ca8         | 1742958                 | (ACT)6                       | 18                                | CTAGGTTTACCCTTTCCCATATA          | TTGACTCTTCTTCTTCAAACG            | 2-1246            | 2-1246                          | JmjC              | TFGMS834                              | 55.1                              | 161                            | 2                                                          | P                                                     | NSA                                                                                                     |
| PUIID16585808  | Ca8         | 3997990                 | (AG)6                        | 12                                | CACCTTCCATCTCTCTCTCT             | AAGCTACTGAAGTTGGTGCTA            | 308-811           | 605-754                         | AP2               | TFGMS835                              | 55.2                              | 155                            | 3                                                          | P                                                     | NSA                                                                                                     |
| PUIID16585809  | Ca8         | 3997990                 | (TQ)9                        | 18                                | CACCTTCCATCTCTCTCTCT             | TGACAAACTTATGGGAGAGA             | 308-811           | 605-754                         | AP2               | TFGMS836                              | 55.2                              | 155                            | 2                                                          | P                                                     | NSA                                                                                                     |
| PUIID16585810  | 0           | 0                       | (TC)14                       | 28                                | GGTAGAGGATGAGGATGAGTT            | TTTGTGGATGTTAAAGGTTG             | 159-794           | 582-752                         | Zi-Dof            | TFGMS837                              | 54.8                              | 151                            | 3                                                          | P                                                     | NSA                                                                                                     |
| PUIID16585811  | Ca8         | 15220963                | (ATCAAA)4                    | 24                                | AAGTACTGTGAATGCTTCCAA            | CTTGCTGAATATACGTTGGGT            | 492-863           | 711-824                         | CXC               | TFGMS838                              | 55.1                              | 156                            | 4                                                          | P                                                     | NSA                                                                                                     |
| PUIID16585812  | Ca6         | 21496611                | (TA)10                       | 20                                | TCATCAGAGGTTGCTTCTAAA            | TCAGGAAATTAAAGTAGAATGAG          | 294-1139          | 468-578                         | bZIP              | TFGMS839                              | 55.3                              | 147                            | 4                                                          | P                                                     | NSA                                                                                                     |
| PUIID16585813  | Ca5         | 30587088                | (TCTTGC)3                    | 18                                | TCTTTATCTTCTGCAAAACCA            | TTGATGGTAGAGCAAGACAT             | 332-4186          | 2864-3088                       | SWIB              | TFGMS840                              | 55.3                              | 149                            | 3                                                          | P                                                     | NSA                                                                                                     |
| PUIID16585814  | Ca8         | 5196644                 | (TTC)4                       | 12                                | TAGATCTCACACACACAATGG            | GTTATGGTGTGAATTTTGAGG            | 43-881            | 316-477                         | Zi-HD             | TFGMS841                              | 54.4                              | 143                            | 4                                                          | P                                                     | NSA                                                                                                     |
| PUIID16585815  | Ca8         | 3997837                 | (CT)6                        | 12                                | TGACAAACTTAAATGGGAGAGA           | TCACGACACATCTCTTCTTCT            | 181-684           | 238-387                         | AP2               | TFGMS842                              | 55.0                              | 154                            | 3                                                          | P                                                     | NSA                                                                                                     |
| PUIID16585816  | Ca7         | 2713430                 | (TAAA)3                      | 12                                | CAAAAGTCTAAAGCAATTTACAG          | AGAGTCATGTGCGTTGATAAG            | 316-1242          | 358-534                         | WRKY              | TFGMS843                              | 55.1                              | 148                            | 2                                                          | P                                                     | NSA                                                                                                     |
| PUIID16585817  | Ca4         | 44660343                | (AG)10                       | 20                                | GGACACACACAGAGAGAGAAA            | ACGAGAGATTGTAAGGAGTACC           | 145-918           | 172-582                         | DUF3594           | TFGMS844                              | 55.3                              | 167                            | 6                                                          | P                                                     | NSA                                                                                                     |
| PUIID16585818  | Ca1         | 389726                  | (TTC)4                       | 12                                | ATCCAAACGAGAAATACATGA            | CAAAATTTGAATCAGAACTGC            | 41-1297           | 380-691                         | TCP               | TFGMS845                              | 54.7                              | 152                            | NV                                                         | NV                                                    | NV                                                                                                      |
| PUIID16585819  | 0           | 0                       | (CTC)4                       | 12                                | CCCGAAAAATATAAATCGAGA            | CTCGTTTGTGTTGCTATTGT             | 159-3215          | 492-728                         | SBP               | TFGMS846                              | 55.9                              | 175                            | NV                                                         | NV                                                    | NV                                                                                                      |
| PUIID16585820  | Ca5         | 166052                  | (TCCC)3                      | 12                                | CGAGTATACAAGAGAGCAGGA            | GGAATTAATGAGAGTGACAAGC           | 23-1294           | 194-571                         | NAM               | TFGMS847                              | 54.9                              | 147                            | NV                                                         | NV                                                    | NV                                                                                                      |
| PUIID16585821  | 0           | 0                       | (TGC)4                       | 12                                | TTAAACCAATCTCAAGTCTTCG           | GGAGGTGAATATCTTCCCAAT            | 261-7523          | 5971-6343                       | SET               | TFGMS848                              | 54.7                              | 149                            | NV                                                         | NV                                                    | NV                                                                                                      |
| PUIID16585822  | Ca5         | 38592092                | (GCTT)3                      | 12                                | TTTCTACGATGATATGGAGGA            | GAAAACATGTCTGTTTGGATA            | 853-3472          | 2851-3211                       | JmjC              | TFGMS849                              | 54.8                              | 145                            | NV                                                         | NV                                                    | NV                                                                                                      |
| PUIID16585823  | Ca7         | 36416882                | (GCT)4                       | 12                                | GTAAGATAACAGCTGCCAAAA            | CTCCGAAAACAGATTCCCTAAT           | 3506-7105         | 4535-4777                       | Helicase_c        | TFGMS850                              | 54.9                              | 155                            | NV                                                         | NV                                                    | NV                                                                                                      |
| PUIID16585824  | Ca5         | 11385849                | (GCA)4                       | 12                                | GTTCAACACAAAGACTTGCTT            | TTAACCTGTGGTTCAGCTTAC            | 208-2628          | 1597-1782                       | RPM               | TFGMS851                              | 54.7                              | 148                            | NV                                                         | NV                                                    | NV                                                                                                      |
| PUIID16585825  | Ca2         | 24235872                | (GA)6                        | 12                                | GCAAAATAAGCACAGTGAAGA            | TTTTCAATCCATTACAGGTAA            | 26-1420           | 509-1378                        | SNF2              | TFGMS852                              | 55.8                              | 149                            | NV                                                         | NV                                                    | NV                                                                                                      |
| PUIID16585826  | Ca4         | 30311837                | (GAT)4                       | 12                                | AACCTAAGGAGCTTAATGTTG            | GTGCAAGCAAGCTTAATGCTA            | 900-2052          | 1779-2048                       | SNF2              | TFGMS853                              | 55.3                              | 149                            | NV                                                         | NV                                                    | NV                                                                                                      |
| PUIID16585827  | Ca4         | 35416702                | (GCG)4                       | 12                                | GTTGATGATGAACAACGAAT             | GGTTGAGGAGAAAAATTAAAGC           | 1046-1738         | 1478-1642                       | TCP               | TFGMS854                              | 55.1                              | 176                            | NV                                                         | NV                                                    | NV                                                                                                      |
| PUIID16585828  | Ca4         | 35393450                | (CGC)4                       | 12                                | GGTACTGTTCTGAACAAGATG            | GTTGATGATGAACAACGAAT             | 180-860           | 255-419                         | TCP               | TFGMS855                              | 54.9                              | 192                            | NV                                                         | NV                                                    | NV                                                                                                      |
| PUIID16585829  | Ca7         | 5511848                 | (TCA)4                       | 12                                | AAGTGGAACTGATGATCAAA             | TACCGAAGGTGATTAAGCTCT            | 104-7564          | 4097-4236                       | Helicase_c        | TFGMS856                              | 54.8                              | 156                            | NV                                                         | NV                                                    | NV                                                                                                      |
| PUIID16585830  | Ca6         | 1843362                 | (GAA)4                       | 12                                | CACCACAACAGAACACATATA            | TTGTGAAGGTGTTTGTGAAT             | 129-2029          | 1379-1636                       | DUF573            | TFGMS857                              | 54.5                              | 149                            | NV                                                         | NV                                                    | NV                                                                                                      |
| PUIID16585831  | Ca6         | 9328054                 | (TCT)4                       | 12                                | GCTGTTGTTTGTGATCTCTC             | GGATAGTGAAGGCTCTCTGTG            | 30-2006           | 1-564                           | STARD             | TFGMS858                              | 54.9                              | 159                            | NV                                                         | NV                                                    | NV                                                                                                      |
| PUIID16585832  | Ca5         | 30597009                | (TTC)3                       | 12                                | CGACTTGAATCTCTCCTGTAA            | GCTGATCAGTTGTGTAGAAAG            | 349-852           | 368-822                         | UMSBP             | TFGMS859                              | 54.7                              | 161                            | NV                                                         | NV                                                    | NV                                                                                                      |
| PUIID16585833  | Ca6         | 27235614                | (GT)6                        | 12                                | TACTCTGCCATTAAATGTGTG            | TAACTTCTGCAAAACAAACCC            | 1318-2892         | 1585-1917                       | Response_reg      | TFGMS860                              | 54.5                              | 151                            | NV                                                         | NV                                                    | NV                                                                                                      |
| PUIID16585834  | Ca3         | 37789311                | (GAC)4                       | 12                                | TACATGTTGAGCACAGCTAGA            | TCATGTCATATTGGAATCC              | 1350-2753         | 2155-2292                       | PHD               | TFGMS861                              | 54.7                              | 150                            | NV                                                         | NV                                                    | NV                                                                                                      |
| PUIID16585835  | 0           | 0                       | (TG)6                        | 12                                | TCGAGGTGTGTGTGTGTGTTT            | TCTTCTTCTTCTGCTGCTTCT            | 1804-3588         | 3277-3414                       | PHD               | TFGMS862                              | 54.9                              | 150                            | NV                                                         | NV                                                    | NV                                                                                                      |
| PUIID16585836  | Ca6         | 37388188                | (TGT)4                       | 12                                | TTTGGTGAATGAGAGAGAAA             | TCATGCAATCTGAGAAATC              | 1-1215            | 1098-1215                       | DNA bind          | TFGMS863                              | 55.1                              | 159                            | NV                                                         | NV                                                    | NV                                                                                                      |
| PUIID16585837  | Ca3         | 38688349                | (GGT)4                       | 12                                | AAGGAATTGTGGATGGTAGAT            | ACCTTCAAAACAACTCTTTG             | 58-1188           | 258-976                         | Myb               | TFGMS864                              | 55.1                              | 142                            | NV                                                         | NV                                                    | NV                                                                                                      |
| PUIID16585838  | Ca6         | 22709964                | (CTC)4                       | 12                                | TCGGATAATACACAACTTCAAA           | GAGAAACAGGGTGGATGAC              | 268-2064          | 1408-1716                       | B3                | TFGMS865                              | 55.0                              | 167                            | NV                                                         | NV                                                    | NV                                                                                                      |

| NCBI Probe IDs | Chromosomes | Physical positions (bp) | Microsatellite repeat-motifs | Microsatellite repeat length (bp) | Forward Primer sequences (5'-3') | Reverse Primer sequences (5'-3') | ORF position (bp) | Functional domain position (bp) | Functional domain | Types of genic microsatellite markers | Actual annealing temperature (°C) | Size (bp) of alleles amplified | Total number of alleles amplified among chickpea varieties | Polymorphic potential monomorphic (M)/polymorphic (P) | R2 value of marker loci showing significant association (P ≤ 0.05) with three major seed and pod traits |
|----------------|-------------|-------------------------|------------------------------|-----------------------------------|----------------------------------|----------------------------------|-------------------|---------------------------------|-------------------|---------------------------------------|-----------------------------------|--------------------------------|------------------------------------------------------------|-------------------------------------------------------|---------------------------------------------------------------------------------------------------------|
| PUIID16585839  | Ca5         | 38289000                | (TGG)4                       | 12                                | TGGAACACAACCTACTCTGTT            | CCATCAAAACTCAATCTTCA             | 763-1805          | 1048-1176                       | HLH               | TFGMS866                              | 54.8                              | 165                            | NV                                                         | NV                                                    | NV                                                                                                      |
| PUIID16585840  | Ca1         | 48002802                | (TCTT)3                      | 12                                | CAACACGGTCTCTGACTAAACT           | AAAGTTGTGAAGTGAACTGCG            | 709-3783          | 1429-1518                       | PHD               | TFGMS867                              | 54.9                              | 146                            | NV                                                         | NV                                                    | NV                                                                                                      |
| PUIID16585841  | Ca6         | 11668373                | (GCT)4                       | 12                                | CTTCACCTCGTAGCTTTTCACA           | TACTTTTTTCAGCAGCTTCAGT           | 745-3502          | 2824-3072                       | SWIRM             | TFGMS868                              | 54.9                              | 152                            | NV                                                         | NV                                                    | NV                                                                                                      |
| PUIID16585842  | Ca6         | 10028556                | (TAC)4                       | 12                                | AAATATCCGGGAAGTATCTGCCA          | GGCTTTGTATGTTTGAGGTT             | 1700-2668         | 1931-2113                       | Zi-HD             | TFGMS869                              | 55.4                              | 134                            | NV                                                         | NV                                                    | NV                                                                                                      |
| PUIID16585843  | Ca8         | 1262041                 | (TGG)4                       | 12                                | ATAACATTCGAAGGTGTTGGTG           | CAACATACCTTACCAGTAGCC            | 270-2291          | 1350-1550                       | RRM               | TFGMS870                              | 55.0                              | 155                            | NV                                                         | NV                                                    | NV                                                                                                      |
| PUIID16585844  | Ca6         | 26810868                | (TAA)3                       | 12                                | AATAACACTTTTTCCGTTCCCT           | TTGTCTTGGACCTTCACTCTA            | 135-647           | 564-638                         | Myb               | TFGMS871                              | 54.7                              | 148                            | NV                                                         | NV                                                    | NV                                                                                                      |
| PUIID16585845  | Ca7         | 33481019                | (CGCT)3                      | 12                                | TGTTCTAAGCTTCACCAAT              | ATCGAAAAAGGAAGCGTTATC            | 260-1330          | 872-1141                        | SANT              | TFGMS872                              | 55.0                              | 165                            | NV                                                         | NV                                                    | NV                                                                                                      |
| PUIID16585846  | Ca7         | 33480716                | (TAT)4                       | 12                                | CACATCAAGGCTAATTGAA              | AGCAAAAATCATAGCAACAAC            | 260-1330          | 872-1141                        | SANT              | TFGMS873                              | 53.2                              | 152                            | NV                                                         | NV                                                    | NV                                                                                                      |
| PUIID16585847  | Ca7         | 13905747                | (GAA)4                       | 12                                | TGAATTCACGGACTATGTTTT            | ATCCGTTTGCATTGATCTCT             | 258-1493          | 279-1145                        | Tab               | TFGMS874                              | 54.8                              | 150                            | NV                                                         | NV                                                    | NV                                                                                                      |
| PUIID16585848  | Ca7         | 13320410                | (TCA)4                       | 12                                | TGGTATGGTAACAGACAACA             | TTGGATCTCTTTTGATGTTGT            | 1827-4139         | 3456-3575                       | HomeoBox          | TFGMS875                              | 54.0                              | 177                            | NV                                                         | NV                                                    | NV                                                                                                      |
| PUIID16585849  | Ca4         | 43512749                | (TCT)4                       | 12                                | TGACATGGAATCGATCTACC             | CCATCCCATGAGATGTTGAG             | 573-1883          | 1401-1847                       | bHLH MYC          | TFGMS876                              | 55.0                              | 149                            | NV                                                         | NV                                                    | NV                                                                                                      |
| PUIID16585850  | Ca3         | 37389044                | (GTA)4                       | 12                                | TGGAATTAAACAACATGGAAC            | CATCAACATGTTTGTGTTTG             | 176-1258          | 224-400                         | Myb               | TFGMS877                              | 54.7                              | 155                            | NV                                                         | NV                                                    | NV                                                                                                      |
| PUIID16585851  | Ca4         | 5747457                 | (TTC)4                       | 12                                | CCATGAGAGCTAACCTAAAA             | CGGGAGTATAACGAACTGAT             | 155-2932          | 2374-2635                       | JmjC              | TFGMS878                              | 54.1                              | 144                            | NV                                                         | NV                                                    | NV                                                                                                      |
| PUIID16585852  | 0           | 0                       | (CTT)4                       | 12                                | TCACCTTCACCAAGTTCTTTTA           | GTTAAAGTTGCTGAAGCGATA            | 335-2386          | 515-805                         | JmjC              | TFGMS879                              | 55.0                              | 152                            | NV                                                         | NV                                                    | NV                                                                                                      |
| PUIID16585853  | Ca7         | 16571186                | (GTT)4                       | 12                                | GTTTGTGTTGAAGGCTTTTTTC           | CCAAATCTCATCAATTCTTCA            | 461-1090          | 581-1081                        | mTERF             | TFGMS880                              | 55.8                              | 149                            | NV                                                         | NV                                                    | NV                                                                                                      |
| PUIID16585854  | Ca3         | 39816982                | (GAG)4                       | 12                                | CAGTTAGAGAAGTTGCAGCAG            | GCCAAATCTCTTCTTCTTCTTC           | 479-1678          | 764-1003                        | B3                | TFGMS881                              | 55.6                              | 156                            | NV                                                         | NV                                                    | NV                                                                                                      |
| PUIID16585855  | Ca3         | 39818014                | (GGCA)3                      | 12                                | GAAACTTCAGTGCTGTTTGAT            | TAGAAAGGAAGCTGATGAGGC            | 479-1678          | 764-1003                        | B3                | TFGMS882                              | 54.6                              | 129                            | NV                                                         | NV                                                    | NV                                                                                                      |
| PUIID16585856  | Ca4         | 47905073                | (TGT)4                       | 12                                | AACTGAAGCACAAGCTACAAG            | TCATCACCATTGTCACTATCA            | 56-1318           | 77-947                          | Tab               | TFGMS883                              | 55.0                              | 159                            | NV                                                         | NV                                                    | NV                                                                                                      |
| PUIID16585857  | Ca4         | 45517811                | (TAA)4                       | 12                                | CTCTTCGAGTGTTTTGTATGCA           | AAAAACCGTTCTCATTTGTTGT           | 723-2003          | 1530-1613                       | HLH               | TFGMS884                              | 55.2                              | 152                            | NV                                                         | NV                                                    | NV                                                                                                      |
| PUIID16585858  | Ca4         | 1103152                 | (TTGG)3                      | 12                                | TTATGAAAATGATGGGTTGTC            | AGACAACAGTGCACAACTAAG            | 517-969           | 589-942                         | NAM               | TFGMS885                              | 55.0                              | 156                            | NV                                                         | NV                                                    | NV                                                                                                      |
| PUIID16585859  | Ca2         | 3920987                 | (GAT)4                       | 12                                | TGCAAAAACTGGACGTATACC            | ACATCGATCAGTATTGTCTGG            | Dec-25            | 287-425                         | PHD               | TFGMS886                              | 55.9                              | 143                            | NV                                                         | NV                                                    | NV                                                                                                      |
| PUIID16585860  | Ca6         | 33679310                | (GCC)4                       | 12                                | TCTACGAATGCTTTTCTCAAC            | CACATCCACCACTAACAGGAAC           | 80-2647           | 890-1057                        | PHD               | TFGMS887                              | 54.9                              | 141                            | NV                                                         | NV                                                    | NV                                                                                                      |
| PUIID16585861  | 0           | 0                       | (TGA)4                       | 12                                | CCCAAAATGATTTTGTGTAG             | TAGTTTTGAGGGTTTAAAGCA            | 14-1066           | 350-505                         | Myb               | TFGMS888                              | 54.9                              | 142                            | NV                                                         | NV                                                    | NV                                                                                                      |
| PUIID16585862  | Ca4         | 48385876                | (GGA)4                       | 12                                | TAAAAGTGTGGTGTGGAGT              | ATTTCATTTCAGCAACAAGTC            | 131-2884          | 572-880                         | B3                | TFGMS889                              | 54.8                              | 151                            | NV                                                         | NV                                                    | NV                                                                                                      |
| PUIID16585863  | 0           | 0                       | (TGT)4                       | 12                                | AGAAGGTTGAGTAGTCAAGG             | AACCCAACTGTTCATAGAGT             | 1-1359            | 940-1203                        | BTB               | TFGMS890                              | 55.1                              | 148                            | NV                                                         | NV                                                    | NV                                                                                                      |
| PUIID16585864  | Ca7         | 32809256                | (GAA)3                       | 12                                | ACATGGTTACTTCAACCTTCA            | GTGCTCTCAAACTTCCCTTC             | 351-1823          | 1140-1295                       | AP2               | TFGMS891                              | 54.7                              | 155                            | NV                                                         | NV                                                    | NV                                                                                                      |
| PUIID16585865  | Ca6         | 17049312                | (CTT)4                       | 12                                | ATCATCCACACACACTCTTC             | CTCTCTCAAGTTTCACTTCTC            | 119-1228          | 188-364                         | Zi-Doff           | TFGMS892                              | 54.9                              | 156                            | NV                                                         | NV                                                    | NV                                                                                                      |
| PUIID16585866  | Ca1         | 48129602                | (GAG)4                       | 12                                | ATTGTTTTCTGACAGCTTTTC            | AAGCAATTGAAGGATAAGGAT            | 432-1337          | 483-674                         | TCP               | TFGMS893                              | 53.9                              | 159                            | NV                                                         | NV                                                    | NV                                                                                                      |
| PUIID16585867  | Ca1         | 389670                  | (GGT)4                       | 12                                | AATAACCAACCAAGAGTGGT             | TGAGAATGAGATTGTGAATCC            | 41-1297           | 380-891                         | TCP               | TFGMS894                              | 54.0                              | 148                            | NV                                                         | NV                                                    | NV                                                                                                      |
| PUIID16585868  | Ca4         | 439269                  | (TGT)4                       | 12                                | CAAAAAGCTGTTATCAACTGG            | CACCTGAGCACTGCCAAGTAAC           | 389-3034          | 2006-2125                       | PHD               | TFGMS895                              | 55.2                              | 146                            | NV                                                         | NV                                                    | NV                                                                                                      |
| PUIID16585869  | Ca3         | 20831311                | (CTCG)3                      | 12                                | ATTGAACAAGTGTTAGCAAAA            | GTGGAATAAGCACACAAAAC             | 3270-4370         | 3447-4355                       | WD40              | TFGMS896                              | 55.1                              | 151                            | NV                                                         | NV                                                    | NV                                                                                                      |
| PUIID16585870  | Ca3         | 20832380                | (TGA)4                       | 12                                | CGGATTGATTCATGTAGAAG             | GAGGACTAAGTGGAGGAGTTC            | 3270-4370         | 3447-4355                       | WD40              | TFGMS897                              | 54.9                              | 149                            | NV                                                         | NV                                                    | NV                                                                                                      |
| PUIID16585871  | Ca5         | 39847615                | (CTT)4                       | 12                                | CAACCTTTAAACATCCAACAAC           | GTGACACACTTGTGAACCTT             | 1553-2188         | 1563-2095                       | Ras               | TFGMS898                              | 55.3                              | 148                            | NV                                                         | NV                                                    | NV                                                                                                      |
| PUIID16585872  | Ca7         | 3355529                 | (TGC)4                       | 12                                | TTGAGTATGATGTTGGGATGT            | TGCACATGCAGTTTCTACATA            | 560-3937          | 3254-3562                       | B3                | TFGMS899                              | 55.4                              | 152                            | NV                                                         | NV                                                    | NV                                                                                                      |
| PUIID16585873  | Ca7         | 3356094                 | (TGT)4                       | 12                                | AGCAGTGTCAAGTTTGTGAT             | CAACAACACAGTTGTACAGCAG           | 560-3937          | 3254-3562                       | B3                | TFGMS900                              | 54.9                              | 152                            | NV                                                         | NV                                                    | NV                                                                                                      |
| PUIID16585874  | Ca5         | 32189146                | (TTA)4                       | 12                                | TGTTCTGTAGTGCAAGAGGTT            | CTAAAGAGAGATTGGGTTCAAG           | 114-1877          | 869-788                         | HomeoBox          | TFGMS901                              | 55.1                              | 151                            | NV                                                         | NV                                                    | NV                                                                                                      |
| PUIID16585875  | 0           | 0                       | (TTG)4                       | 12                                | ACCGTCCGATTGGTTATTAT             | CGTAACTAACGCAGTACCTTC            | 214-1212          | 853-1128                        | HSF DNA bind      | TFGMS902                              | 56.0                              | 144                            | NV                                                         | NV                                                    | NV                                                                                                      |
| PUIID16585876  | Ca1         | 2837375                 | (TCT)4                       | 12                                | TCAAAGATTGCTTAACATTGC            | GAAGCAGAAAGTGCTTATACCA           | 250-2382          | 703-1011                        | B3                | TFGMS903                              | 54.7                              | 144                            | NV                                                         | NV                                                    | NV                                                                                                      |
| PUIID16585877  | Ca6         | 55329451                | (TAA)4                       | 12                                | TCTCATCATCTATTTTGGAA             | TTAATGGAATGGTTCAGCTA             | 522-1952          | 1269-1388                       | HomeoBox          | TFGMS904                              | 54.8                              | 139                            | NV                                                         | NV                                                    | NV                                                                                                      |
| PUIID16585878  | Ca6         | 55329451                | (TAG)4                       | 12                                | TGTCATCATCTATTTTGGAA             | CCAACACCTACTGTTTGAAGA            | 522-1952          | 1269-1388                       | HomeoBox          | TFGMS905                              | 54.8                              | 139                            | NV                                                         | NV                                                    | NV                                                                                                      |
| PUIID16585879  | Ca4         | 39795924                | (TTT)4                       | 12                                | TTTCAACCAACACACACAC              | GATAAATCCAAATTCGCATA             | 308-3313          | 575-715                         | Myb DNA binding   | TFGMS906                              | 55.3                              | 150                            | NV                                                         | NV                                                    | NV                                                                                                      |
| PUIID16585880  | Ca6         | 41281599                | (GCT)4                       | 12                                | TAGGGAATGGTATCAAGATGA            | AAATGGTTCGACCAAGTTC              | 307-1299          | 925-1056                        | WRC               | TFGMS907                              | 54.7                              | 156                            | NV                                                         | NV                                                    | NV                                                                                                      |
| PUIID16585881  | Ca7         | 5635095                 | (TGG)4                       | 12                                | GAGAAGAGGTGGAGGAATTTA            | TAAATTCCTCCACCTCTTCTC            | 345-1304          | 909-1172                        | Myb DNA binding   | TFGMS908                              | 55.1                              | 131                            | NV                                                         | NV                                                    | NV                                                                                                      |
| PUIID16585882  | Ca5         | 15825973                | (GATT)3                      | 12                                | TTGTCAATCCAAGTGATTTAT            | GCCTCACTGTATGCTTGTAGA            | 44-1435           | 620-808                         | RING              | TFGMS909                              | 54.7                              | 162                            | NV                                                         | NV                                                    | NV                                                                                                      |
| PUIID16585883  | Ca6         | 18027925                | (TAT)4                       | 12                                | AATTCAATAGCCTCTCTCGT             | TCTACCATGAATTTGTCAGAT            | 290-1525          | 560-715                         | Myb DNA binding   | TFGMS910                              | 54.9                              | 141                            | NV                                                         | NV                                                    | NV                                                                                                      |
| PUIID16585884  | Ca6         | 18026293                | (TGT)4                       | 12                                | GCTACAGTCACAGATTGCTCT            | TGCAGAGATAAGATGAATTGG            | 290-1525          | 560-715                         | Myb DNA binding   | TFGMS911                              | 54.8                              | 149                            | NV                                                         | NV                                                    | NV                                                                                                      |
| PUIID16585885  | Ca6         | 18027925                | (TTA)4                       | 12                                | AATTCAATAGCCTCTCTCGT             | TCTACCATGAATTTTGCAGAT            | 290-1525          | 560-715                         | Myb DNA binding   | TFGMS912                              | 54.9                              | 141                            | NV                                                         | NV                                                    | NV                                                                                                      |
| PUIID16585886  | 0           | 0                       | (TGG)4                       | 12                                | GATCCAAGGCTGTTGAAGT              | GCTACCACCATAGCTCTCTC             | 53-670            | 68-265                          | CSD               | TFGMS913                              | 55.2                              | 155                            | NV                                                         | NV                                                    | NV                                                                                                      |
| PUIID16585887  | 0           | 0                       | (CTT)3                       | 12                                | TAAAGAAATTCGCCCTGTCTA            | AACCAAAATTGACTGATTGAG            | 80-682            | 110-406                         | YTH1              | TFGMS914                              | 55.3                              | 144                            | NV                                                         | NV                                                    | NV                                                                                                      |
| PUIID16585888  | Ca7         | 889496                  | (TTG)4                       | 12                                | CACGCTTGTTATTTTGTGAA             | CACCATTTCTCACTGTCACAC            | 98-1076           | 555-731                         | WRKY              | TFGMS915                              | 55.0                              | 149                            | NV                                                         | NV                                                    | NV                                                                                                      |
| PUIID16585889  | Ca2         | 10254490                | (TCG)4                       | 12                                | GTTTCTCTCTCCATTCAACCT            | ACTATACTCCCGAAGACAT              | 163-1092          | 448-582                         | Myb DNA binding   | TFGMS916                              | 55.0                              | 150                            | NV                                                         | NV                                                    | NV                                                                                                      |
| PUIID16585890  | Ca5         | 34509970                | (GCA)4                       | 12                                | TTCCGCTGGGAGATACAGATA            | CCATTGCACTACCATTTAAG             | 180-2873          | 2505-2609                       | WD40              | TFGMS917                              | 54.9                              | 144                            | NV                                                         | NV                                                    | NV                                                                                                      |
| PUIID16585891  | 0           | 0                       | (TTC)4                       | 12                                | TCGCTAATCATCAGTATCGTC            | GTTACCTTTATGGCATCTTG             | 329-1825          | 1220-1480                       | Myb DNA binding   | TFGMS918                              | 55.2                              | 180                            | NV                                                         | NV                                                    | NV                                                                                                      |
| PUIID16585892  | Ca2         | 30868473                | (TTTA)3                      | 12                                | TAGAGCAAGAGCAGATGGTAG            | CATGAATTTTGTCTTTGGAC             | 240-2327          | 432-623                         | ANK               | TFGMS919                              | 55.1                              | 165                            | NV                                                         | NV                                                    | NV                                                                                                      |
| PUIID16585893  | Ca5         | 3947535                 | (TGA)4                       | 12                                | GAATCATCATAGCCAAATTGA            | CATCATCATGTTAATGCAATG            | 157-1230          | 877-1086                        | TCP               | TFGMS920                              | 55.2                              | 148                            | NV                                                         | NV                                                    | NV                                                                                                      |
| PUIID16585894  | Ca1         | 203312                  | (TTC)4                       | 12                                | TGATGATTATTTGGTTTCCCTC           | GCAACTAGAAGACGCTGATAA            | 238-2373          | 1387-1563                       | RRM               | TFGMS921                              | 54.4                              | 152                            | NV                                                         | NV                                                    | NV                                                                                                      |
| PUIID16585895  | Ca7         | 8419862                 | (GTT)4                       | 12                                | CCATCATTTGTGCTTTTAAGG            | CATCAGCCTTTTTCACATTAG            | 1445-2314         | 1877-2212                       | Response          | TFGMS922                              | 54.8                              | 160                            | NV                                                         | NV                                                    | NV                                                                                                      |
| PUIID16585896  | Ca8         | 4460360                 | (GAT)4                       | 12                                | TGTTCAAAGGAAGATACAGA             | TGTGGAGACAGGCTACATAAT            | 120-1178          | 588-797                         | SWIB              | TFGMS923                              | 55.0                              | 154                            | NV                                                         | NV                                                    | NV                                                                                                      |
| PUIID16585897  | Ca3         | 30319786                | (GAT)4                       | 12                                | AGAAGAGTTGAGTTGGGATGT            | CGTGTGTATGCACATGTACT             | 130-1335          | 613-747                         | BSD               | TFGMS924                              | 55.4                              | 149                            | NV                                                         | NV                                                    | NV                                                                                                      |
| PUIID16585898  | Ca1         | 10065563                | (GT)6                        | 12                                | AATAAAGGTTGTTGGGGTAG             | CCTTCATAGGTTGATTGTATG            | 848-1511          | 1002-1463                       | AUX_1AA           | TFGMS925                              | 55.0                              | 143                            | NV                                                         | NV                                                    | NV                                                                                                      |
| PUIID16585899  | 0           | 0                       | (CT)6                        | 12                                | CTTTCTCTCTACTCCTCTCAA            | ACAGTAGCAACAGATCCAAGA            | 450-4657          | 1209-1871                       | START             | TFGMS926                              | 54.6                              | 143                            | NV                                                         | NV                                                    | NV                                                                                                      |
| PUIID16585900  | Ca4         | 9451990                 | (TTCT)3                      | 12                                | ATTTTGATTCTCCTCAGATCC            | AGGGTAGAAAACATGGAAAAG            | 138-1349          | 828-983                         | Myb DNA binding   | TFGMS927                              | 54.9                              | 145                            | NV                                                         | NV                                                    | NV                                                                                                      |

| NCBI Probe IDs | Chromosomes | Physical positions (bp) | Microsatellite repeat-motifs | Microsatellite repeat length (bp) | Forward Primer sequences (5'-3') | Reverse Primer sequences (5'-3') | ORF position (bp) | Functional domain position (bp) | Functional domain | Types of genic microsatellite markers | Actual annealing temperature (°C) | Size (bp) of alleles amplified | Total number of alleles amplified among chickpea varieties | Polymorphic potential monomorphic (M)/polymorphic (P) | R2 value of marker loci showing significant association (P ≤ 0.05) with three major seed and pod traits |
|----------------|-------------|-------------------------|------------------------------|-----------------------------------|----------------------------------|----------------------------------|-------------------|---------------------------------|-------------------|---------------------------------------|-----------------------------------|--------------------------------|------------------------------------------------------------|-------------------------------------------------------|---------------------------------------------------------------------------------------------------------|
| PUID16585901   | Ca3         | 37212123                | (TGA)4                       | 12                                | CCTCAAAATGATCCAAACTTTA           | CCAATGATAGGAAGAAAGGT             | 400-948           | 457-594                         | HLH               | TFGMS928                              | 54.5                              | 153                            | NV                                                         | NV                                                    | NV                                                                                                      |
| PUID16585902   | Ca5         | 35389451                | (CGA)4                       | 12                                | GATATATCCGATACACGGCTTT           | AACCTCGAGCCTTTTCTGTAC            | 363-1097          | 954-1088                        | ZfB Box           | TFGMS929                              | 53.7                              | 149                            | NV                                                         | NV                                                    | NV                                                                                                      |
| PUID16585903   | Ca6         | 29256025                | (GTG)4                       | 12                                | GAGGAAGTTACCAAAAGCAAC            | GGTTACATTGTTGCAATTCAT            | 31-816            | 271-351                         | ZfC2H2            | TFGMS930                              | 55.7                              | 162                            | NV                                                         | NV                                                    | NV                                                                                                      |
| PUID16585904   | Ca4         | 6180269                 | (TGC)3                       | 12                                | CAGGAGGAGGACATCTCTAAT            | GGATGCATTATGCATATCACA            | 115-903           | 706-825                         | HomeoBox          | TFGMS931                              | 55.0                              | 158                            | NV                                                         | NV                                                    | NV                                                                                                      |
| PUID16585905   | Ca4         | 22195121                | (TCA)4                       | 12                                | CTTCTCCTCTTATCATTTGCT            | GAATCTAACAGCTTTGGTCAC            | 1-1302            | 853-1101                        | Myb DNA binding   | TFGMS932                              | 55.3                              | 180                            | NV                                                         | NV                                                    | NV                                                                                                      |
| PUID16585906   | Ca4         | 22196962                | (TTG)4                       | 12                                | TGTTCCGTTCACTAGTTGTCT            | CGCTTCTTCTCTCTCTCTCTC            | 1-1302            | 853-1101                        | Myb DNA binding   | TFGMS933                              | 55.0                              | 169                            | NV                                                         | NV                                                    | NV                                                                                                      |
| PUID16585907   | Ca1         | 3235738                 | (GAA)4                       | 12                                | ATAATGGTTATCTCGGAGGA             | TCTTCTTCGTGTTCATGTTCT            | 178-1098          | 232-504                         | Myb DNA binding   | TFGMS934                              | 55.4                              | 151                            | NV                                                         | NV                                                    | NV                                                                                                      |
| PUID16585908   | Ca5         | 41254342                | (TG)6                        | 12                                | AGGAAGAGAAAGAGGACAAGA            | GCTCAAAATATCTAAGCAGAGG           | 549-1787          | 1647-1778                       | B-box             | TFGMS935                              | 54.9                              | 134                            | NV                                                         | NV                                                    | NV                                                                                                      |
| PUID16585909   | Ca4         | 5155600                 | (TTG)4                       | 12                                | TTTGGTAAGGCTAATATGACG            | TATATCGAAGACGAATTGGAA            | 221-1420          | 854-1144                        | DUF573            | TFGMS936                              | 54.8                              | 152                            | NV                                                         | NV                                                    | NV                                                                                                      |
| PUID16585910   | Ca7         | 8015348                 | (TCT)4                       | 12                                | CAACAACAACCTCTCGGAAAC            | TGATTTGGAAGATGAAGAGTTG           | 117-1184          | 273-473                         | TCP               | TFGMS937                              | 54.9                              | 155                            | NV                                                         | NV                                                    | NV                                                                                                      |
| PUID16585911   | Ca6         | 13184584                | (TGA)4                       | 12                                | GAACTAATGTGTTGGGAACCT            | ACTTCACCTTCTAGCCCTTTA            | 32-1249           | 608-826                         | SET               | TFGMS938                              | 54.9                              | 145                            | NV                                                         | NV                                                    | NV                                                                                                      |
| PUID16585912   | Ca5         | 29786557                | (GAA)4                       | 12                                | AGAAGAAGGAGGTTGTCATC             | AGCCAAAGAACAAGAAGAAG             | 362-4102          | 764-1159                        | AAA               | TFGMS939                              | 55.0                              | 159                            | NV                                                         | NV                                                    | NV                                                                                                      |
| PUID16585913   | Ca5         | 37147069                | (GAA)4                       | 12                                | AGGTGGAAACAATATGGAAT             | GCCTGAGTTTCCTAAAGAGTC            | 229-1044          | 412-588                         | Zf-HD-dimer       | TFGMS940                              | 55.1                              | 119                            | NV                                                         | NV                                                    | NV                                                                                                      |
| PUID16585914   | Ca5         | 37146985                | (GAG)4                       | 12                                | AACCCAAACTCCAAATAAAAC            | GAATCCCAATTTGCTTCTTCT            | 229-1044          | 412-588                         | Zf-HD-dimer       | TFGMS941                              | 54.9                              | 157                            | NV                                                         | NV                                                    | NV                                                                                                      |
| PUID16585915   | Ca7         | 2713430                 | (TAA)3                       | 12                                | CAAAGTCAACCAATTTCAACG            | AGAGTCATGTGCGGTGATAAG            | 735-1505          | 807-938                         | Plant Zn clusf    | TFGMS942                              | 55.1                              | 148                            | NV                                                         | NV                                                    | NV                                                                                                      |
| PUID16585916   | 0           | 0                       | (GAT)4                       | 12                                | TTGTTTGTGCAAGTTTAAAGAG           | ATCCCAATTTTCAAAACACAG            | 193-1002          | 330-743                         | Whisly            | TFGMS943                              | 55.1                              | 153                            | NV                                                         | NV                                                    | NV                                                                                                      |
| PUID16585917   | Ca6         | 58554755                | (GTT)3                       | 12                                | TGCTTTTCTCTACTCGCTTTA            | AGACACAGATCATCCCAAGTG            | 499-972           | 586-765                         | bZIP              | TFGMS944                              | 54.8                              | 163                            | NV                                                         | NV                                                    | NV                                                                                                      |
| PUID16585918   | Ca5         | 27301868                | (GA)6                        | 12                                | TGTTTAGTCGCATGAAGTTGT            | CTTCACTCTCACTCTCCTCA             | 276-1082          | 576-698                         | AP2               | TFGMS945                              | 56.2                              | 148                            | NV                                                         | NV                                                    | NV                                                                                                      |
| PUID16585919   | Ca5         | 45592893                | (TCA)4                       | 12                                | CTTCTCATTTGTCAAGTATGG            | TTAGCAAAACCTGTGAATTA             | 97-1074           | 196-375                         | Zf-Dof            | TFGMS946                              | 55.2                              | 157                            | NV                                                         | NV                                                    | NV                                                                                                      |
| PUID16585920   | 0           | 0                       | (TA)6                        | 12                                | CATAGTCGGAGTGATAACTG             | CGATGTAGCCAATGTAAAAG             | 137-1651          | 992-1117                        | PSP               | TFGMS947                              | 54.9                              | 143                            | NV                                                         | NV                                                    | NV                                                                                                      |
| PUID16585921   | Ca1         | 4865701                 | (GTA)4                       | 12                                | CAAGCAATTAACGGTAAAAAGA           | CTATACCGTTTCAATCCAAAC            | 22-1449           | 604-771                         | BSD               | TFGMS948                              | 55.0                              | 152                            | NV                                                         | NV                                                    | NV                                                                                                      |
| PUID16585922   | Ca8         | 4628307                 | (CGA)4                       | 12                                | CAAGTCTCTGTTTGTGAAACG            | GATGATTTCAACATGGGAATA            | 105-2279          | 918-1322                        | POX               | TFGMS949                              | 54.9                              | 152                            | NV                                                         | NV                                                    | NV                                                                                                      |
| PUID16585923   | Ca2         | 22141288                | (GCA)4                       | 12                                | GTTGGAGGAGAAGATGAAGAT            | CCAGATTAGCTCAATTGTTG             | 105-2279          | 918-1322                        | POX               | TFGMS950                              | 54.9                              | 151                            | NV                                                         | NV                                                    | NV                                                                                                      |
| PUID16585924   | Ca2         | 32955094                | (TCTA)3                      | 12                                | TGCTCAATTTTATAGTTCAAC            | ATCTGAAACAAGAGACCCACT            | 581-1390          | 1175-1312                       | bZIP              | TFGMS951                              | 55.0                              | 186                            | NV                                                         | NV                                                    | NV                                                                                                      |
| PUID16585925   | Ca8         | 4023096                 | (CTA)4                       | 12                                | GTCCCTCCACCAATTTGTTTA            | GTGGTTGTGAATGAGAGAAG             | 415-1980          | 1162-1314                       | AP2               | TFGMS952                              | 55.9                              | 149                            | NV                                                         | NV                                                    | NV                                                                                                      |
| PUID16585926   | Ca8         | 4020082                 | (GAT)4                       | 12                                | AAGGAAAGAGTGTGGATCTG             | TTGACAAAATTTCAACCCAA             | 415-1980          | 1162-1314                       | AP2               | TFGMS953                              | 55.2                              | 158                            | NV                                                         | NV                                                    | NV                                                                                                      |
| PUID16585927   | Ca8         | 4020199                 | (GGT)4                       | 12                                | TTGGGTTTTCGAATGATGTA             | ATTTGATCAAGAGGTTCTCAT            | 415-1980          | 1162-1314                       | AP2               | TFGMS954                              | 54.8                              | 164                            | NV                                                         | NV                                                    | NV                                                                                                      |
| PUID16585928   | Ca8         | 4020168                 | (TAG)4                       | 12                                | GGAACGTTGAAGAAAAAGACT            | CAGTTGCTAACAAATGTGGTG            | 415-1980          | 1162-1314                       | AP2               | TFGMS955                              | 55.3                              | 160                            | NV                                                         | NV                                                    | NV                                                                                                      |
| PUID16585929   | Ca4         | 45420293                | (GAT)4                       | 12                                | GTGCTGAATGTTATGCACCTT            | GGGTTTTTCATTGATTTCTTC            | 270-1436          | 395-509                         | HomeoBox          | TFGMS956                              | 55.5                              | 135                            | NV                                                         | NV                                                    | NV                                                                                                      |
| PUID16585930   | Ca4         | 45415195                | (TA)6                        | 12                                | GGAAGAAATCAATGAAAAACC            | AGGCCAAATTTCTGTACTCT             | 270-1436          | 395-509                         | HomeoBox          | TFGMS957                              | 55.4                              | 159                            | NV                                                         | NV                                                    | NV                                                                                                      |
| PUID16585931   | Ca7         | 27236578                | (GT)4                        | 12                                | CAATGTGACCTCCTGTACTTT            | ATATAGAACCAGAGGCGAGGC            | 411-1628          | 1311-1511                       | TCP               | TFGMS958                              | 54.3                              | 150                            | NV                                                         | NV                                                    | NV                                                                                                      |
| PUID16585932   | Ca7         | 33739638                | (GAA)4                       | 12                                | ATGCCTCTTTCGAAGTTTACT            | ACTTTGATCATCGTGCATCAT            | 236-2587          | 2033-2326                       | ARID              | TFGMS959                              | 55.0                              | 167                            | NV                                                         | NV                                                    | NV                                                                                                      |
| PUID16585933   | Ca7         | 10684263                | (CTTT)3                      | 12                                | TTTCATTAGTCACAGCAAAACA           | GAAATGTGTTGATCGCTTGAA            | 248-1897          | 1175-1327                       | Myb DNA binding   | TFGMS960                              | 54.5                              | 151                            | NV                                                         | NV                                                    | NV                                                                                                      |
| PUID16585934   | Ca8         | 12526570                | (GAT)4                       | 12                                | ATCAAGCTGTTTGGTAGAACA            | GATATCCCTTCTTGACCAACT            | 204-1583          | 307-515                         | Myb DNA binding   | TFGMS961                              | 55.1                              | 149                            | NV                                                         | NV                                                    | NV                                                                                                      |
| PUID16585935   | Ca3         | 17180152                | (GCA)4                       | 12                                | CAGTCTAACAGGAATGATGGA            | TGCTTTGCTGTTTCTGTACTC            | 242-2649          | 1847-1951                       | WD40              | TFGMS962                              | 55.2                              | 140                            | NV                                                         | NV                                                    | NV                                                                                                      |
| PUID16585936   | Ca6         | 22661507                | (TGC)4                       | 12                                | GCACAGATTTCATCTAGTGT             | TATTTGCGTGATCTTAAGGAG            | 566-4963          | 3938-4087                       | PHD               | TFGMS963                              | 55.1                              | 151                            | NV                                                         | NV                                                    | NV                                                                                                      |
| PUID16585937   | Ca1         | 17402954                | (TTTA)3                      | 12                                | TGGGATGAATTCAACTTTAGA            | TGACCCCAATCAAGGATTATAA           | 202-2907          | 1747-1842                       | Ank               | TFGMS964                              | 54.9                              | 157                            | NV                                                         | NV                                                    | NV                                                                                                      |
| PUID16585938   | Ca1         | 24070712                | (GCA)4                       | 12                                | CAACAAGCTAGCTCTTACAG             | CATAAGCTGAGACTGCAAAAG            | 777-4139          | 1152-1460                       | B3                | TFGMS965                              | 54.8                              | 154                            | NV                                                         | NV                                                    | NV                                                                                                      |
| PUID16585939   | 0           | 0                       | (GGT)3                       | 12                                | AAAAAGCAGAACACAGCACTA            | CACGTTTCGTTAACTCACTCT            | 1067-1870         | 1448-1528                       | Zf-CCCH           | TFGMS966                              | 55.3                              | 153                            | NV                                                         | NV                                                    | NV                                                                                                      |
| PUID16585940   | Ca2         | 10060265                | (TCA)4                       | 12                                | GGGAGTCTGAGTCTTTAGGA             | GACCAAGATCTCTTGGAATAA            | 115-2715          | 2533-2661                       | Myb DNA binding   | TFGMS967                              | 55.2                              | 145                            | NV                                                         | NV                                                    | NV                                                                                                      |
| PUID16585941   | Ca3         | 29569841                | (CTG)4                       | 12                                | CTGCAATAATGATGCTCAAC             | ATGGGAAATGGAGAAGGA               | 589-2772          | 2371-2637                       | Ank               | TFGMS968                              | 56.0                              | 149                            | NV                                                         | NV                                                    | NV                                                                                                      |
| PUID16585942   | Ca1         | 3999887                 | (TCA)4                       | 12                                | ACATCATCAACAATGGTCTTC            | ATGTTGTTGCTCAGTTGGAA             | 226-1611          | 445-651                         | TCP               | TFGMS969                              | 54.9                              | 151                            | NV                                                         | NV                                                    | NV                                                                                                      |
| PUID16585943   | Ca1         | 5666044                 | (TTG)4                       | 12                                | AAAAACAAGGAACCAAGAAG             | ATCTCCTCTATCATTTGGTGGT           | 2184-5712         | 3577-3960                       | APG6              | TFGMS970                              | 55.3                              | 126                            | NV                                                         | NV                                                    | NV                                                                                                      |
| PUID16585944   | Ca5         | 37494945                | (TGC)3                       | 12                                | AGCTATTCTTCGTGAAGAGGT            | CTCTGTACACATCAGAAGGT             | 634-1692          | 997-1110                        | GATA              | TFGMS971                              | 55.0                              | 154                            | NV                                                         | NV                                                    | NV                                                                                                      |
| PUID16585945   | Ca6         | 5509444                 | (TCTT)3                      | 12                                | ATACACCCCTCAACTTTGGTTT           | CAACAACAACAACAACAAGCTA           | 323-1897          | 1592-1735                       | HLH               | TFGMS972                              | 55.3                              | 153                            | NV                                                         | NV                                                    | NV                                                                                                      |
| PUID16585946   | Ca3         | 27665600                | (GAA)4                       | 12                                | GAGACCCATTGTGTTTACTT             | AGGTAGGGTTTGTGTTACCTT            | 288-1684          | 1406-1657                       | K tetra           | TFGMS973                              | 55.7                              | 161                            | NV                                                         | NV                                                    | NV                                                                                                      |
| PUID16585947   | Ca8         | 5564500                 | (TGA)4                       | 12                                | CCCATTTGATTACTTGAAGAC            | ACTCTAGGGTTTTCACTTTCG            | 149-3886          | 1601-1738                       | GYF               | TFGMS974                              | 54.7                              | 150                            | NV                                                         | NV                                                    | NV                                                                                                      |
| PUID16585948   | Ca1         | 15487460                | (GTT)4                       | 12                                | GTTCCAGTCTTGAAGAAGAG             | CCCACTCTGATCTTCATCTTC            | 255-683           | 267-425                         | HTH               | TFGMS975                              | 55.7                              | 154                            | NV                                                         | NV                                                    | NV                                                                                                      |
| PUID16585949   | Ca5         | 30616947                | (TTG)4                       | 12                                | AGCTAACCAAAAGAAACACGA            | GAAAAACAACCTCCCTCCTTA            | 100-1014          | 757-861                         | GATA              | TFGMS976                              | 54.6                              | 148                            | NV                                                         | NV                                                    | NV                                                                                                      |
| PUID16585950   | Ca3         | 23643849                | (TAA)4                       | 12                                | GGATGGACCTTAAGAAGACATT           | TAAACCTTTTCTCTCCTTTTGT           | 192-527           | 393-431                         | WRKY              | TFGMS977                              | 54.8                              | 149                            | NV                                                         | NV                                                    | NV                                                                                                      |
| PUID16585951   | Ca6         | 12572288                | (CTT)4                       | 12                                | GATCTTTTCAACAAGCAAGA             | AAAAACAATGAACCTTTCAC             | 840-2244          | 1029-1292                       | TCP               | TFGMS978                              | 54.8                              | 147                            | NV                                                         | NV                                                    | NV                                                                                                      |
| PUID16585952   | Ca6         | 12571282                | (TQ)6                        | 12                                | CAGTGTCTGAATTTTCGTGAT            | TTCTCCATTGTAGGAGTAGCA            | 840-2244          | 1029-1292                       | TCP               | TFGMS979                              | 55.3                              | 158                            | NV                                                         | NV                                                    | NV                                                                                                      |
| PUID16585953   | Ca6         | 12572068                | (TCA)4                       | 12                                | GTCAAGGTGTGATATTGCTGT            | TTTCCCTTTGTGATCTGAATA            | 840-2244          | 1029-1292                       | TCP               | TFGMS980                              | 55.0                              | 151                            | NV                                                         | NV                                                    | NV                                                                                                      |
| PUID16585954   | Ca5         | 30179966                | (GCT)4                       | 12                                | CACACTTTAAAGCAACCTCAT            | AACTAATAGAGCTGGCTCCTT            | 286-1980          | 1273-1485                       | Sigma70           | TFGMS981                              | 54.7                              | 134                            | NV                                                         | NV                                                    | NV                                                                                                      |
| PUID16585955   | Ca5         | 30179302                | (TTT)4                       | 12                                | TATTTAATCAATCAGCCTTGG            | ATGAGGTTGCTTTTAAAGTGTG           | 286-1980          | 1273-1485                       | Sigma70           | TFGMS982                              | 54.6                              | 149                            | NV                                                         | NV                                                    | NV                                                                                                      |
| PUID16585956   | 0           | 0                       | (TGG)4                       | 12                                | GTCCCTATTCTCCGATCTC              | AAATCTGTACTTGTGCTGTG             | 396-1229          | 300-440                         | Zf Bbox           | TFGMS983                              | 55.3                              | 149                            | NV                                                         | NV                                                    | NV                                                                                                      |
| PUID16585957   | Ca4         | 48122188                | (TACA)3                      | 12                                | TCTCACAAGATTCCCTTCCTT            | AGCATGAACCGTACAAAAATA            | 495-2333          | 1050-1157                       | HomeoBox          | TFGMS984                              | 55.6                              | 161                            | NV                                                         | NV                                                    | NV                                                                                                      |
| PUID16585958   | 0           | 0                       | (GGT)4                       | 12                                | TCTAAAGGCGTATTGGTTCT             | CTATCACCACCTCAACAACACTC          | 304-1134          | 742-846                         | WD40              | TFGMS985                              | 54.9                              | 164                            | NV                                                         | NV                                                    | NV                                                                                                      |
| PUID16585959   | Ca1         | 46719697                | (TTT)4                       | 12                                | GATAAATTTGAAACCGCCATAC           | ACGAATTCATTTTGTGGTGT             | 149-1957          | 212-1261                        | mTERF             | TFGMS986                              | 56.3                              | 142                            | NV                                                         | NV                                                    | NV                                                                                                      |
| PUID16585960   | 0           | 0                       | (TTG)4                       | 12                                | GACATCCGTCGCCAGTTACTA            | CATCAATTAAAGCTCACAAACC           | 239-2206          | 521-773                         | Myb DNA binding   | TFGMS987                              | 55.1                              | 133                            | NV                                                         | NV                                                    | NV                                                                                                      |
| PUID16585961   | 0           | 0                       | (TTG)4                       | 12                                | GGAATAGTAGAAGGGGGTGT             | CAACACCTTCAAAATACCAC             | 239-2206          | 521-773                         | Myb DNA binding   | TFGMS988                              | 54.9                              | 151                            | NV                                                         | NV                                                    | NV                                                                                                      |
| PUID16585962   | Ca4         | 13727564                | (TCC)4                       | 12                                | AGTTTCAATTCCTCGTCAAT             | AGATGGATGTGTTTGATTTTG            | 517-4470          | 2197-2277                       | PHD               | TFGMS989                              | 55.3                              | 158                            | NV                                                         | NV                                                    | NV                                                                                                      |

| NCBI Probe IDs | Chromosomes | Physical positions (bp) | Microsatellite repeat-motifs | Microsatellite repeat length (bp) | Forward Primer sequences (5'-3') | Reverse Primer sequences (5'-3') | ORF position (bp) | Functional domain position (bp) | Functional domain | Types of genic microsatellite markers | Actual annealing temperature (°C) | Size (bp) of alleles amplified | Total number of alleles amplified among chickpea varieties | Polymorphic potential monomorphic (M)/polymorphic (P) | R2 value of marker loci showing significant association ( $P \leq 0.05$ ) with three major seed and pod traits |
|----------------|-------------|-------------------------|------------------------------|-----------------------------------|----------------------------------|----------------------------------|-------------------|---------------------------------|-------------------|---------------------------------------|-----------------------------------|--------------------------------|------------------------------------------------------------|-------------------------------------------------------|----------------------------------------------------------------------------------------------------------------|
| PUID16585963   | 0           | 0                       | (TAA)4                       | 12                                | GGTGAGAAAAGGCAAAATAGAT           | CCATAACATCAGTATCCCAAA            | 295-1413          | 637-909                         | Thioredoxine      | TFGMS990                              | 55.2                              | 148                            | NV                                                         | NV                                                    | NV                                                                                                             |
| PUID16585964   | Ca1         | 5765349                 | (TCT)4                       | 12                                | AACAACAACACTCCTGGTTTA            | TGAGTAAAGCTTCCAAGAGAC            | 55-924            | 709-813                         | HomeoBox          | TFGMS991                              | 54.8                              | 145                            | NV                                                         | NV                                                    | NV                                                                                                             |
| PUID16585965   | Ca2         | 26833724                | (GGT)4                       | 12                                | GGACAATTGGATTCTGTGACT            | TCATCTTTAGGTTTCATCCTTG           | 21-1746           | 1251-1427                       | WRKY              | TFGMS992                              | 55.6                              | 156                            | NV                                                         | NV                                                    | NV                                                                                                             |
| PUID16585966   | Ca8         | 15607448                | (TCT)4                       | 12                                | TAAATGGCGTAGAGATGTTCA            | CATAACTTGTTCGGAGTCTTG            | 209-886           | 377-472                         | AP2               | TFGMS993                              | 55.2                              | 155                            | NV                                                         | NV                                                    | NV                                                                                                             |
| PUID16585967   | Ca8         | 8840253                 | (CT)6                        | 12                                | TCTCAAAATCAACCTAAATGC            | CTGCTATCCACCTCTTTTCAC            | 289-2259          | 1753-1893                       | HLH               | TFGMS994                              | 54.7                              | 146                            | NV                                                         | NV                                                    | NV                                                                                                             |
| PUID16585968   | Ca8         | 8841717                 | (GGT)4                       | 12                                | ACGGAATGCTTTCTTTTACTT            | CAAAACTCAGAATCTCACCAG            | 289-2259          | 1753-1893                       | HLH               | TFGMS995                              | 55.0                              | 139                            | NV                                                         | NV                                                    | NV                                                                                                             |
| PUID16585969   | 0           | 0                       | (CT)6                        | 12                                | ACTCCTAAACCTTTTGTGTGC            | GGCAGAGAGAAAGAGAGAGAG            | 239-1300          | 437-1273                        | AUX-IAA           | TFGMS996                              | 55.3                              | 167                            | NV                                                         | NV                                                    | NV                                                                                                             |
| PUID16585970   | Ca3         | 27041765                | (TGT)4                       | 12                                | TGAGTATCCCTTAATCAGGAA            | TGCACAGTAACAACAACCTCAG           | 872-2200          | 1685-2017                       | MATH              | TFGMS997                              | 54.9                              | 146                            | NV                                                         | NV                                                    | NV                                                                                                             |
| PUID16585971   | Ca4         | 11053035                | (GAT)4                       | 12                                | AGGTTTTCAAGAAAAGTGGAC            | GAGGATCAATAACAGAGATTG            | 363-2039          | 523-803                         | NAM               | TFGMS998                              | 55.1                              | 147                            | NV                                                         | NV                                                    | NV                                                                                                             |
| PUID16585972   | Ca4         | 11052375                | (TCAA)3                      | 12                                | AAGTATGATCCTGGGTGAGTT            | CTCAGGTGATTCAGAAAAATG            | 363-2039          | 523-803                         | NAM               | TFGMS999                              | 55.2                              | 151                            | NV                                                         | NV                                                    | NV                                                                                                             |
| PUID16585973   | Ca6         | 789811                  | (TTA)4                       | 12                                | AGCACTGAGGTCATATTGAGA            | AAATCTCATCGATCCTTCTTC            | 258-2126          | 279-1385                        | GRAS              | TFGMS1000                             | 55.0                              | 145                            | NV                                                         | NV                                                    | NV                                                                                                             |
| PUID16585974   | Ca7         | 5426491                 | (CTT)4                       | 12                                | AGTTGTAAGTCTCTTATTTTC            | ATCTCAGAAGACAAGGGGAAG            | 1540-3402         | 1606-1848                       | Helicase          | TFGMS1001                             | 54.8                              | 156                            | NV                                                         | NV                                                    | NV                                                                                                             |
| PUID16585975   | Ca7         | 5427952                 | (TCG)4                       | 12                                | ATCTCGGGATCAACATTACTT            | GTCATGAACAGATCGAAGAC             | 1540-3402         | 1606-1848                       | Helicase          | TFGMS1002                             | 55.3                              | 158                            | NV                                                         | NV                                                    | NV                                                                                                             |
| PUID16585976   | Ca1         | 22350311                | (TGT)4                       | 12                                | TTGTTGATGTGATGTTGGTG             | CCTATCAACCTATCGAACCTT            | 88-1548           | 1231-1487                       | WRKY              | TFGMS1003                             | 55.0                              | 144                            | NV                                                         | NV                                                    | NV                                                                                                             |
| PUID16585977   | Ca5         | 40620289                | (TA)6                        | 12                                | TGGATATGTGAAAGCAAAGA             | TGAAACCAACCAACAAATCAC            | 39-728            | 399-560                         | HomeoBox          | TFGMS1004                             | 55.0                              | 140                            | NV                                                         | NV                                                    | NV                                                                                                             |
| PUID16585978   | Ca5         | 31758233                | (TTG)4                       | 12                                | GGAACACTCCTTGAGACTCTTC           | TCACAACAACAACAGAGAAAT            | 286-2301          | 1174-2010                       | DnaJ              | TFGMS1005                             | 54.7                              | 147                            | NV                                                         | NV                                                    | NV                                                                                                             |
| PUID16585979   | Ca4         | 48077178                | (TTA)3                       | 12                                | CCAACCTTTTTAGTCTTTGATTTG         | TCCTCAGAACCTCAACTTTGA            | 121-585           | 208-384                         | bZIP              | TFGMS1006                             | 55.1                              | 143                            | NV                                                         | NV                                                    | NV                                                                                                             |
| PUID16585980   | Ca3         | 39292008                | (TTT)3                       | 12                                | TTCTTTTCTCTCTGCATTG              | CCAAAATCATCATATAAACG             | 100-1755          | 502-789                         | BTB               | TFGMS1007                             | 55.0                              | 164                            | NV                                                         | NV                                                    | NV                                                                                                             |
| PUID16585981   | Ca3         | 4829696                 | (TTA)4                       | 12                                | CATCATTTTCATTTCCATTGTC           | GTGGTGGACATGTTTTATTTT            | 198-1748          | 1401-1577                       | WRKY              | TFGMS1008                             | 54.6                              | 152                            | NV                                                         | NV                                                    | NV                                                                                                             |
| PUID16585982   | Ca1         | 45076076                | (CTT)3                       | 12                                | CCTTTGGTGTAGATGATGATA            | GGAACCAACGATGAGTATAAA            | 253-5448          | 3460-4341                       | KAT11             | TFGMS1009                             | 55.0                              | 141                            | NV                                                         | NV                                                    | NV                                                                                                             |
| PUID16585983   | Ca8         | 8417363                 | (TGT)4                       | 12                                | GCTTAAGGTTTGTGTTGTTTG            | CAAGAAGTGAAGATGAAGATGG           | 363-1553          | 747-902                         | Myb DNA binding   | TFGMS1010                             | 55.5                              | 150                            | NV                                                         | NV                                                    | NV                                                                                                             |
| PUID16585984   | Ca8         | 8417501                 | (TTG)4                       | 12                                | AGAAATGGAAGAGGGTTTGT             | CATCATCACTTCCAAACATT             | 363-1553          | 747-902                         | Myb DNA binding   | TFGMS1011                             | 54.7                              | 186                            | NV                                                         | NV                                                    | NV                                                                                                             |
| PUID16585985   | Ca7         | 34321017                | (GAA)4                       | 12                                | ATCAGAATTTGACAAGGAGGT            | GAGGGATAGTGTGTTGTTGTA            | 712-1293          | 832-1122                        | B3                | TFGMS1012                             | 55.3                              | 153                            | NV                                                         | NV                                                    | NV                                                                                                             |
| PUID16585986   | 0           | 0                       | (TTC)4                       | 12                                | GTGGAATTCATATGGGTTTA             | TCCACTCAGAGATACTCCCA             | 408-1298          | 771-905                         | Myb DNA binding   | TFGMS1013                             | 54.2                              | 153                            | NV                                                         | NV                                                    | NV                                                                                                             |
| PUID16585987   | Ca6         | 3654970                 | (TTA)4                       | 12                                | GCCTTATTCTGCACAGTTGATA           | CTCAAAACCAACAAGATCAC             | 30-764            | 168-320                         | AP2               | TFGMS1014                             | 54.6                              | 133                            | NV                                                         | NV                                                    | NV                                                                                                             |
| PUID16585988   | Ca1         | 2741494                 | (CTC)3                       | 12                                | ATCTTTCCTCTTCGTGTGATG            | GGAAGTTGAAGCCTATGAAT             | 287-5644          | 5360-5506                       | HomeoBox          | TFGMS1015                             | 55.2                              | 167                            | NV                                                         | NV                                                    | NV                                                                                                             |
| PUID16585989   | Ca5         | 30816603                | (TGT)4                       | 12                                | GCTACAATTGGCATATGAAG             | TAGCAGCTGATGTTGCTCTT             | 100-1257          | 556-699                         | HLH               | TFGMS1016                             | 55.1                              | 151                            | NV                                                         | NV                                                    | NV                                                                                                             |
| PUID16585990   | Ca3         | 36687785                | (GTT)3                       | 12                                | AAAACCCCTCAATTATCAAG             | AAGCATCATGCAAGAATAAG             | 236-1222          | 572-652                         | ZICCH             | TFGMS1017                             | 55.0                              | 154                            | NV                                                         | NV                                                    | NV                                                                                                             |
| PUID16585991   | 0           | 0                       | (GAG)4                       | 12                                | AGAAGAAGAAGAGGTGGTAGG            | ACCTCTACTGTTCTTCGCTCC            | 357-2489          | 1146-1205                       | ZICCH             | TFGMS1018                             | 54.4                              | 151                            | NV                                                         | NV                                                    | NV                                                                                                             |
| PUID16585992   | Ca6         | 20762848                | (TTA)4                       | 12                                | AAGGAGGGGTTTCTCTTTAT             | CTCTTCTCTTCTTCGCCACAC            | 162-875           | 492-641                         | HLH               | TFGMS1019                             | 55.2                              | 134                            | NV                                                         | NV                                                    | NV                                                                                                             |
| PUID16585993   | Ca1         | 12710098                | (GAG)4                       | 12                                | AACCTGTGGAAGCATCTGTTA            | CACCTGGAAATACAGTACGAA            | 521-901           | 686-814                         | ACT               | TFGMS1020                             | 55.1                              | 151                            | NV                                                         | NV                                                    | NV                                                                                                             |
| PUID16585994   | Ca2         | 26158349                | (TGG)4                       | 12                                | AATAATAGGAGGGAAGGGTTT            | AATTGCTGAAGCTGAAGATTA            | 107-1144          | 259-427                         | FHA               | TFGMS1021                             | 55.1                              | 152                            | NV                                                         | NV                                                    | NV                                                                                                             |
| PUID16585995   | Ca1         | 21136404                | (TATT)3                      | 12                                | AGACAGTGCAGCAAGATCTAC            | TGACAGCTGAAATTAACCACT            | 234-845           | 336-593                         | K-Box             | TFGMS1022                             | 54.8                              | 150                            | NV                                                         | NV                                                    | NV                                                                                                             |
| PUID16585996   | Ca8         | 892496                  | (GATT)3                      | 12                                | GGAAGTTAAGTCAGTGTATAGAA          | ACAACCACTTCCATTATACACA           | 264-1031          | 462-740                         | Acetyltransf      | TFGMS1023                             | 54.6                              | 156                            | NV                                                         | NV                                                    | NV                                                                                                             |
| PUID16585997   | Ca2         | 35557054                | (CTT)4                       | 12                                | CTAGGGTTCGAGAGATGATTT            | GAAGCAGCGTAGTGGTAAAC             | 199-783           | 280-471                         | Histone           | TFGMS1024                             | 55.1                              | 149                            | NV                                                         | NV                                                    | NV                                                                                                             |
| PUID16585998   | Ca4         | 42774790                | (TCA)4                       | 12                                | CTTTCAAACTTTGTTCCAAATG           | GTAAGGGTGGTTGAAATTTT             | 416-1084          | 500-955                         | DUF702            | TFGMS1025                             | 55.1                              | 145                            | NV                                                         | NV                                                    | NV                                                                                                             |
| PUID16585999   | Ca4         | 8751680                 | (GTG)4                       | 12                                | TGCAGTAGAAGAAGCAGAGAG            | AGACCTATCTTTCCGTTTGT             | 100-1488          | 1015-1389                       | NAM               | TFGMS1026                             | 55.3                              | 153                            | NV                                                         | NV                                                    | NV                                                                                                             |
| PUID16586000   | Ca6         | 4214592                 | (CT)6                        | 12                                | AGGGAAGAGGAATAAAGTTTG            | GATCTGCAAGAAGTGTGAAAAG           | 509-3874          | 3146-3454                       | B3                | TFGMS1027                             | 54.4                              | 135                            | NV                                                         | NV                                                    | NV                                                                                                             |
| PUID16586001   | Ca4         | 48201292                | (TGT)4                       | 12                                | ATCACCGTTAATCAAACTCTC            | ACATCACCAAAACCTTAACAA            | 1-251             | 78-227                          | DUF702            | TFGMS1028                             | 55.7                              | 150                            | NV                                                         | NV                                                    | NV                                                                                                             |
| PUID16586002   | Ca7         | 28547530                | (GCT)4                       | 12                                | CTTGGGATTCCAATTATAAATG           | GAAGAAATGAGTTAATGGAGGA           | 786-1760          | 975-1211                        | SBP               | TFGMS1029                             | 53.9                              | 152                            | NV                                                         | NV                                                    | NV                                                                                                             |
| PUID16586003   | Ca7         | 28548004                | (GCTA)3                      | 12                                | GCTCTCCATTAACTCAATTTC            | CAACTTCAAGCTCAATGTTTT            | 786-1760          | 975-1211                        | SBP               | TFGMS1030                             | 55.5                              | 168                            | NV                                                         | NV                                                    | NV                                                                                                             |
| PUID16586004   | Ca7         | 28549569                | (GGT)4                       | 12                                | GTGTGTTTACATGAGGGAGTG            | CAACTTCAAGCTCAATGTTTT            | 786-1760          | 975-1211                        | SBP               | TFGMS1031                             | 55.5                              | 154                            | NV                                                         | NV                                                    | NV                                                                                                             |
| PUID16586005   | Ca7         | 28547876                | (TAT)4                       | 12                                | AACAACGTCACGCCATATTATT           | CACTTTAAACCACACAACAG             | 786-1760          | 975-1211                        | SBP               | TFGMS1032                             | 54.1                              | 152                            | NV                                                         | NV                                                    | NV                                                                                                             |
| PUID16586006   | Ca7         | 28550154                | (TTTG)3                      | 12                                | TTTGAGAAACGAGAGCAGACTA           | AGGGTGAAGTGAGATCTTTT             | 786-1760          | 975-1211                        | SBP               | TFGMS1033                             | 55.5                              | 161                            | NV                                                         | NV                                                    | NV                                                                                                             |
| PUID16586007   | Ca7         | 7893649                 | (TCT)4                       | 12                                | TCTAGCTTTGTTCCAACTTC             | TTAATTCACTGTTCCAACTTCC           | 232-978           | 511-660                         | BSD               | TFGMS1034                             | 54.7                              | 133                            | NV                                                         | NV                                                    | NV                                                                                                             |
| PUID16586008   | 0           | 0                       | (GTT)4                       | 12                                | TCTCTCTTCTCTCTCTCTCTCA           | GGTAAGTCTTCATAACGAACG            | 121-900           | 154-929                         | HSF               | TFGMS1035                             | 54.5                              | 172                            | NV                                                         | NV                                                    | NV                                                                                                             |
| PUID16586009   | Ca7         | 7474564                 | (TCT)4                       | 12                                | TTAGGACAATCAATGAAGAT             | ATGAGGAAGCATAAACAGGAGT           | 112-1014          | 136-288                         | Myb DNA binding   | TFGMS1036                             | 54.9                              | 153                            | NV                                                         | NV                                                    | NV                                                                                                             |
| PUID16586010   | Ca7         | 7475343                 | (TTT)4                       | 12                                | TGGAAGAAGTGAATACACATT            | TATGTTGGCCTGTTATTGGTA            | 112-1014          | 136-288                         | Myb DNA binding   | TFGMS1037                             | 54.9                              | 155                            | NV                                                         | NV                                                    | NV                                                                                                             |
| PUID16586011   | Ca5         | 43835460                | (TGC)3                       | 12                                | TGTCGCGAATCTTACGATCC             | CCATCTTCAGAGAGAAACCTCA           | 454-1473          | 613-699                         | bZIP              | TFGMS1038                             | 54.5                              | 133                            | NV                                                         | NV                                                    | NV                                                                                                             |
| PUID16586012   | 0           | 0                       | (TTT)4                       | 12                                | CCATTCTAGCCGCTATTGTTT            | TTGTTAAGATGTGGAAAAGCG            | 1-488             | 363-431                         | Myb DNA binding   | TFGMS1039                             | 55.2                              | 144                            | NV                                                         | NV                                                    | NV                                                                                                             |
| PUID16586013   | Ca4         | 2002236                 | (TTC)4                       | 12                                | ATTTCACTCCATCAATTGAG             | ATACACCAACACAGATTGCAT            | 2-220             | 2-187                           | ovate             | TFGMS1040                             | 55.0                              | 179                            | NV                                                         | NV                                                    | NV                                                                                                             |
| PUID16586014   | Ca5         | 36711442                | (TCAAT)3                     | 12                                | AGATTGTTTCCATTTTCCAC             | GTAAGTTGTTGTTGAGTTGT             | 18-611            | 93-374                          | HSF               | TFGMS1041                             | 55.0                              | 150                            | NV                                                         | NV                                                    | NV                                                                                                             |
| PUID16586015   | Ca2         | 6862359                 | (TTTG)3                      | 12                                | GAAATGCCCTATTATTCTGAG            | ACAACCTAATCTGGCAGCAG             | 73-423            | 151-306                         | Myb DNA binding   | TFGMS1042                             | 54.6                              | 114                            | NV                                                         | NV                                                    | NV                                                                                                             |
| PUID16586016   | Ca7         | 20120510                | (TCA)4                       | 12                                | CAAAACACGTTGATCTTCTCG            | CTCTCATGCTACGTTTGTGAAG           | 128-840           | 677-832                         | Myb DNA binding   | TFGMS1043                             | 55.0                              | 145                            | NV                                                         | NV                                                    | NV                                                                                                             |
| PUID16586017   | Ca3         | 26542714                | (TTGA)3                      | 12                                | ATCTCTCATCAGTTGAGGTGG            | TGTTATTTCTCTTTCATCACTG           | 333-1499          | 1068-1451                       | NAM               | TFGMS1044                             | 56.6                              | 150                            | NV                                                         | NV                                                    | NV                                                                                                             |
| PUID16586018   | Ca2         | 25291741                | (TTCT)3                      | 12                                | TCTCTTCTACACTTCGCTTG             | TGGGATAATGACAAATATGATG           | 157-1347          | 1024-1236                       | RRM               | TFGMS1045                             | 55.0                              | 158                            | NV                                                         | NV                                                    | NV                                                                                                             |
| PUID16586019   | Ca3         | 3616994                 | (TCT)4                       | 12                                | AAGCTGATATGAATGCTGAGA            | CGTTAACAGCAGCAGTCAAC             | 368-1354          | 575-736                         | Zi-HD             | TFGMS1046                             | 55.2                              | 158                            | NV                                                         | NV                                                    | NV                                                                                                             |
| PUID16586020   | Ca3         | 25756988                | (TTT)4                       | 12                                | ACCAAGTTTCTTCTCTCAGC             | CTGGTTAAGGAAGAGGATGTT            | 223-2466          | 1180-1662                       | YDG-SRA           | TFGMS1047                             | 55.4                              | 151                            | NV                                                         | NV                                                    | NV                                                                                                             |
| PUID16586021   | Ca3         | 38615300                | (GGA)4                       | 12                                | CATAGACGCTGAAGAGCCTTA            | AGTCAGAGCTCCAATTTCAC             | 144-1427          | 864-1085                        | Myb DNA binding   | TFGMS1048                             | 55.2                              | 147                            | NV                                                         | NV                                                    | NV                                                                                                             |
| PUID16586022   | Ca3         | 38615518                | (TCT)4                       | 12                                | GTTTCTTCTGCTCAAAAACCA            | ACTCCCTTTTCACTCCTATG             | 144-1427          | 864-1085                        | Myb DNA binding   | TFGMS1049                             | 55.4                              | 144                            | NV                                                         | NV                                                    | NV                                                                                                             |
| PUID16586023   | Ca4         | 9472194                 | (GTTA)3                      | 12                                | CGTGTGCTCTAACCATCTTC             | CTACCTCCTTCCATTTTCTGT            | 184-984           | 441-954                         | B3                | TFGMS1050                             | 54.9                              | 150                            | NV                                                         | NV                                                    | NV                                                                                                             |
| PUID16586024   | Ca6         | 10054407                | (TCTA)3                      | 12                                | TCTGTTGTTTCTCTGATTGG             | CAACTAACACCAGGAAGCAAC            | 706-1158          | 814-990                         | bZIP              | TFGMS1051                             | 54.6                              | 150                            | NV                                                         | NV                                                    | NV                                                                                                             |

| NCBI Probe IDs | Chromosomes | Physical positions (bp) | Microsatellite repeat-motifs | Microsatellite repeat length (bp) | Forward Primer sequences (5'-3') | Reverse Primer sequences (5'-3') | ORF position (bp) | Functional domain position (bp) | Functional domain | Types of genic microsatellite markers | Actual annealing temperature (°C) | Size (bp) of alleles amplified | Total number of alleles amplified among chickpea varieties | Polymorphic potential monomorphic (M)/polymorphic (P) | R2 value of marker loci showing significant association ( $P \leq 0.05$ ) with three major seed and pod traits |
|----------------|-------------|-------------------------|------------------------------|-----------------------------------|----------------------------------|----------------------------------|-------------------|---------------------------------|-------------------|---------------------------------------|-----------------------------------|--------------------------------|------------------------------------------------------------|-------------------------------------------------------|----------------------------------------------------------------------------------------------------------------|
| PUIID16586025  | Ca3         | 22060177                | (GCA)4                       | 12                                | TTATAAGCAGCACCTTCAAAT            | ATTCCCTGATTCAATATGGT             | 191-2011          | 1241-1996                       | SMC prok          | TFGMS1052                             | 54.5                              | 150                            | NV                                                         | NV                                                    | NV                                                                                                             |
| PUIID16586026  | Ca8         | 3683250                 | (TAA)3                       | 12                                | GGCTATAAGAGAGACGAGAAA            | CAATATGTTTAAGCAGCGAGAC           | 296-1000          | 689-997                         | DUF280            | TFGMS1053                             | 55.1                              | 149                            | NV                                                         | NV                                                    | NV                                                                                                             |
| PUIID16586027  | 0           | 0                       | (TC)6                        | 12                                | AAACTGGCTCGTGTGTTT               | TTATGGGTTTCGTCAAAGTTA            | 209-961           | 224-616                         | DUF3594           | TFGMS1054                             | 55.1                              | 155                            | NV                                                         | NV                                                    | NV                                                                                                             |
| PUIID16586028  | Ca5         | 12078869                | (CTT)4                       | 12                                | GGATCTCACATCACACCATAG            | TATCGAGTCTCTCTTCATTG             | 163-1050          | 181-375                         | CBFD-NFYB         | TFGMS1055                             | 55.2                              | 140                            | NV                                                         | NV                                                    | NV                                                                                                             |
| PUIID16586029  | Ca7         | 11192806                | (GTG)4                       | 12                                | AAGAGTTTCAAGAAATTGAAGG           | AGCCATAGAGAAAGTGGTTTT            | 108-974           | 531-695                         | HomeoBox          | TFGMS1056                             | 55.2                              | 149                            | NV                                                         | NV                                                    | NV                                                                                                             |
| PUIID16586030  | Ca7         | 32386290                | (TTG)4                       | 12                                | CTGAAAACCTCTTCAACAGTG            | ATCTCTTTCAACCCATAAACG            | 299-1066          | 632-1039                        | DUF3594           | TFGMS1057                             | 55.1                              | 156                            | NV                                                         | NV                                                    | NV                                                                                                             |
| PUIID16586031  | Ca7         | 12022627                | (TTAA)3                      | 12                                | TCTGCACCTGATGCTACTAAT            | TGAAACTGTGCTCTGTAAAC             | 129-1130          | 906-1088                        | WRKY              | TFGMS1058                             | 55.2                              | 147                            | NV                                                         | NV                                                    | NV                                                                                                             |
| PUIID16586032  | Ca4         | 45596042                | (TTG)4                       | 12                                | AACCGTCAGTCATGAGATTG             | GTTGTGATCAAAAGTATTGC             | 126-2153          | 1350-1484                       | WRK               | TFGMS1059                             | 55.0                              | 150                            | NV                                                         | NV                                                    | NV                                                                                                             |
| PUIID16586033  | Ca5         | 21386676                | (TCA)4                       | 12                                | CAAGATTATGATTGGAGCAG             | AAATGGTGCTAATTGGATCT             | 725-2170          | 1739-2074                       | Response-reg      | TFGMS1060                             | 54.7                              | 150                            | NV                                                         | NV                                                    | NV                                                                                                             |
| PUIID16586034  | Ca6         | 38815534                | (TTG)4                       | 12                                | TATCTGAAAACCTCTTCCTG             | CCATGATTAACTCAAAAGTG             | 243-2444          | 1365-2438                       | GRAS              | TFGMS1061                             | 55.1                              | 141                            | NV                                                         | NV                                                    | NV                                                                                                             |
| PUIID16586035  | Ca6         | 17265368                | (GAA)3                       | 12                                | AAGAGGCTCGAGAGACAAGAT            | ACGTTTTTCCTCTCGTTTAGT            | 380-5683          | 515-685                         | HomeoBox          | TFGMS1062                             | 55.1                              | 156                            | NV                                                         | NV                                                    | NV                                                                                                             |
| PUIID16586036  | Ca3         | 29120707                | (GAA)4                       | 12                                | GGAGGAAGAGGAAGAGAGAAT            | GAGAGGACCTGAATTTCTTGT            | 238-2583          | 1420-1548                       | Myb DNA binding   | TFGMS1063                             | 55.7                              | 172                            | NV                                                         | NV                                                    | NV                                                                                                             |
| PUIID16586037  | Ca5         | 44152835                | (GATC)3                      | 12                                | ACATCCATCACACATCACAC             | AGAGAGAGAAATTGAGGGAAA            | 238-2583          | 1420-1548                       | Myb DNA binding   | TFGMS1064                             | 54.7                              | 151                            | NV                                                         | NV                                                    | NV                                                                                                             |
| PUIID16586038  | Ca5         | 24343863                | (GTT)3                       | 12                                | AGATGCATGTTTGATTCTGT             | TGGTCAGAAGACACATGAGAG            | 491-1504          | 821-991                         | CBFD-NFYB         | TFGMS1065                             | 54.0                              | 159                            | NV                                                         | NV                                                    | NV                                                                                                             |
| PUIID16586039  | Ca5         | 36756738                | (GTT)4                       | 12                                | GGGATTTCAGATTGTGAATTTA           | CAGAGAAATATACCACGCTTTC           | 147-1436          | 1197-1268                       | bZIP              | TFGMS1066                             | 54.2                              | 195                            | NV                                                         | NV                                                    | NV                                                                                                             |
| PUIID16586040  | Ca5         | 26429761                | (TGA)4                       | 12                                | AAGAGAGAAGTGGGAGAGAGA            | TCGTTCTCTGATATCCTTAATTC          | 155-1210          | 837-1075                        | WRKY              | TFGMS1067                             | 54.9                              | 164                            | NV                                                         | NV                                                    | NV                                                                                                             |
| PUIID16586041  | Ca2         | 32544903                | (TTG)4                       | 12                                | CTTTCTCTGGAGCTTTGATTT            | CCGATTGAATGTACCAACAG             | 216-1943          | 780-821                         | ZICCHC            | TFGMS1068                             | 55.5                              | 168                            | NV                                                         | NV                                                    | NV                                                                                                             |
| PUIID16586042  | Ca8         | 3456870                 | (GCG)4                       | 12                                | TATATATGGCCATGAAGTTCG            | AGATAAGGGTTTGTAGGAATG            | 189-2045          | 1670-1904                       | Acetyltransf      | TFGMS1069                             | 55.3                              | 140                            | NV                                                         | NV                                                    | NV                                                                                                             |
| PUIID16586043  | Ca4         | 8299437                 | (GAG)4                       | 12                                | GAAAGTCAGACATGAAAATG             | TCATCCTCTGCAGTACTAAGG            | 37-1437           | 475-609                         | BSD               | TFGMS1070                             | 55.2                              | 157                            | NV                                                         | NV                                                    | NV                                                                                                             |
| PUIID16586044  | Ca3         | 38103222                | (CTT)3                       | 12                                | TTCAAGTATCATGCGATACGG            | GAATCGTTTTACTCCCTTTTC            | 156-596           | 297-518                         | Histone           | TFGMS1071                             | 54.9                              | 168                            | NV                                                         | NV                                                    | NV                                                                                                             |
| PUIID16586045  | 0           | 0                       | (CTA)4                       | 12                                | GATTTCAATCATCATCTGCTG            | TCGTTTGACACAATCTATTTT            | 117-1022          | 260-474                         | TCP               | TFGMS1072                             | 54.8                              | 152                            | NV                                                         | NV                                                    | NV                                                                                                             |
| PUIID16586046  | Ca3         | 31369487                | (ATT)4                       | 12                                | TTTGGCCATAAATGACTCTCAC           | ATTCTTCATGATGAATCTCC             | 111-677           | 573-668                         | NAM               | TFGMS1073                             | 55.3                              | 153                            | NV                                                         | NV                                                    | NV                                                                                                             |
| PUIID16586047  | Ca1         | 27139182                | (TGA)3                       | 12                                | AAGTAGAGAAGGATTTGTGG             | ATTGGATGGAGGTAAACAAAT            | 2-625             | 8-268                           | mTERF             | TFGMS1074                             | 55.1                              | 162                            | NV                                                         | NV                                                    | NV                                                                                                             |
| PUIID16586048  | Ca1         | 5452940                 | (TTTA)3                      | 12                                | AAGAGCTCATATAGCAATCGA            | TGAAACTCTTATTTTCTGTGG            | 220-447           | 253-370                         | Myb DNA binding   | TFGMS1075                             | 54.4                              | 171                            | NV                                                         | NV                                                    | NV                                                                                                             |
| PUIID16586049  | Ca1         | 21485683                | (TGA)4                       | 12                                | TGTCAAGAACTCTCCAATCTCA           | TACTCAATGACACACCCCTCAAC          | 1-984             | 466-852                         | NAM               | TFGMS1076                             | 55.4                              | 155                            | NV                                                         | NV                                                    | NV                                                                                                             |
| PUIID16586050  | 0           | 0                       | (TTTC)3                      | 12                                | TTTATGAGGATATGGGTGCTA            | AAACCCAAATCTTTCTCCTA             | 126-827           | 528-752                         | Acetyltransf      | TFGMS1077                             | 54.9                              | 138                            | NV                                                         | NV                                                    | NV                                                                                                             |
| PUIID16586051  | Ca5         | 37896821                | (TGT)4                       | 12                                | GGTATGACCAACCAATTTGAA            | AACATCAATTCAATCTGAGAG            | 299-940           | 581-790                         | Histone           | TFGMS1078                             | 55.1                              | 142                            | NV                                                         | NV                                                    | NV                                                                                                             |
| PUIID16586052  | 0           | 0                       | (TGA)4                       | 12                                | TCAACAATACCCTTAGTGGG             | CAAGTCTAGAAGCTGTGGGAAA           | 84-902            | 123-266                         | Myb DNA binding   | TFGMS1079                             | 54.8                              | 153                            | NV                                                         | NV                                                    | NV                                                                                                             |
| PUIID16586053  | Ca4         | 41986308                | (TCAA)3                      | 12                                | CCATAACACAAAAGTGAGCAT            | GAAAGAAAAGACCGATTTAATG           | 343-747           | 439-651                         | Histone           | TFGMS1080                             | 55.3                              | 169                            | NV                                                         | NV                                                    | NV                                                                                                             |
| PUIID16586054  | Ca7         | 34655351                | (GAT)4                       | 12                                | TCAAAATGTGAGACTGATGTGA           | AAAATTCAAGACCAAGGTTTC            | 41-772            | 149-301                         | HomeoBox          | TFGMS1081                             | 55.0                              | 143                            | NV                                                         | NV                                                    | NV                                                                                                             |
| PUIID16586055  | Ca3         | 9394912                 | (TTG)4                       | 12                                | CATTAGAAACACAAACCACTTG           | AGTTCAATGCAACACAAATTC            | 4-606             | 370-468                         | AP2               | TFGMS1082                             | 55.0                              | 149                            | NV                                                         | NV                                                    | NV                                                                                                             |
| PUIID16586056  | Ca5         | 28184701                | (TCA)4                       | 12                                | CTCTTAAATCAGCTGTCTCCA            | AAAGTGGTGAAGAGAAAATGA            | 304-786           | 502-609                         | ACT               | TFGMS1083                             | 54.9                              | 149                            | NV                                                         | NV                                                    | NV                                                                                                             |
| PUIID16586057  | Ca3         | 39347450                | (TTG)4                       | 12                                | GAGAAGCTCAAAAGGAACCCCTA          | CAAAAGCTACGTTATTTGCTGTC          | 171-695           | 318-518                         | Acetyltransf      | TFGMS1084                             | 55.2                              | 140                            | NV                                                         | NV                                                    | NV                                                                                                             |
| PUIID16586058  | Ca5         | 44394479                | (TCT)4                       | 12                                | AAAGTGTAGACATCACAAAGAA           | CACAAGACACACAAAAGAAA             | 173-718           | 212-508                         | K-Box             | TFGMS1085                             | 55.2                              | 177                            | NV                                                         | NV                                                    | NV                                                                                                             |
| PUIID16586059  | Ca2         | 31928132                | (TTG)4                       | 12                                | AGGGTTCTCTTCTTCTTCTACA           | AACTGATGAAGTAGGAGACAAA           | 164-796           | 230-328                         | AP2               | TFGMS1086                             | 54.8                              | 141                            | NV                                                         | NV                                                    | NV                                                                                                             |
| PUIID16586060  | Ca8         | 9320772                 | (GAA)4                       | 12                                | AAATTAAAGCACCACCAAGCTCT          | ACAACCAAGATACTCTGTCAA            | 71-949            | 803-946                         | Zi-Dof            | TFGMS1087                             | 54.8                              | 186                            | NV                                                         | NV                                                    | NV                                                                                                             |
| PUIID16586061  | Ca4         | 1103152                 | (TTGG)3                      | 12                                | TTATGAAATGATGGGTTGTG             | AGACAACAGTGCACAACTAAG            | 505-957           | 577-930                         | NAM               | TFGMS1088                             | 55.0                              | 156                            | NV                                                         | NV                                                    | NV                                                                                                             |
| PUIID16586062  | Ca6         | 21278800                | (GCA)4                       | 12                                | TTATCACTCTCCTTTGCACTTC           | CTTGGCAATAGGGACGAC               | 616-1152          | 793-1071                        | Myb DNA binding   | TFGMS1089                             | 55.1                              | 152                            | NV                                                         | NV                                                    | NV                                                                                                             |
| PUIID16586063  | Ca2         | 3236367                 | (TTAA)3                      | 12                                | CGATACATTTTGGCCATCTAT            | GATGGAGTGAAGTTTGAGATG            | 247-525           | 250-483                         | PLN03217          | TFGMS1090                             | 56.7                              | 142                            | NV                                                         | NV                                                    | NV                                                                                                             |
| PUIID16586064  | Ca1         | 20214017                | (TAG)4                       | 12                                | CACATCATGTCTCTCAGAAGAG           | GAATTGTAACGGTTTCAACAAA           | 83-592            | 326-589                         | DUF280            | TFGMS1091                             | 55.0                              | 156                            | NV                                                         | NV                                                    | NV                                                                                                             |
| PUIID16586065  | Ca4         | 16278173                | (TTA)4                       | 12                                | TGCAATGATTACTGCATCATA            | ATGAACAAGTGAAGAGGTGA             | 189-1520          | 1344-1472                       | Zi B-Box          | TFGMS1092                             | 55.3                              | 134                            | NV                                                         | NV                                                    | NV                                                                                                             |
| PUIID16586066  | Ca8         | 3998027                 | (TCT)4                       | 12                                | TCAACGACAGTCTCTTTCTG             | GCAAAAAGTGATGTTGTTGAT            | 308-811           | 605-754                         | AP2               | TFGMS1093                             | 54.7                              | 155                            | NV                                                         | NV                                                    | NV                                                                                                             |
| PUIID16586067  | Ca5         | 39847615                | (CTT)4                       | 12                                | CAACCTTTTAACATCCAACAAA           | GTGACACACTTGATGAACCTT            | 159-794           | 582-752                         | Zi-Dof            | TFGMS1094                             | 55.3                              | 148                            | NV                                                         | NV                                                    | NV                                                                                                             |
| PUIID16586068  | Ca8         | 12526570                | (GAT)4                       | 12                                | ATCAAGCTGTTTGGTAGAACA            | GATATCCCCTCTTGACCAACT            | 204-1583          | 384-515                         | Myb DNA binding   | TFGMS1095                             | 55.1                              | 149                            | NV                                                         | NV                                                    | NV                                                                                                             |
| PUIID16586069  | Ca5         | 3947535                 | (TGA)4                       | 12                                | GAATCATCATGACCAAAATTGA           | CAACCAAAAAGACAGAAATGA            | 22-1077           | 742-951                         | TCP               | TFGMS1096                             | 55.2                              | 148                            | NV                                                         | NV                                                    | NV                                                                                                             |
| PUIID16586070  | Ca5         | 30597009                | (TTTC)3                      | 12                                | CGACTTGAATCTCTCTGTAA             | GCTGATCAGTTGTGGTAGAAG            | 349-852           | 388-822                         | PTZ00368          | TFGMS1097                             | 54.7                              | 161                            | NV                                                         | NV                                                    | NV                                                                                                             |
| PUIID16586071  | Ca5         | 5343555                 | (TGT)4                       | 12                                | CTCCAACCTTTTTCAGCATGTA           | CCACCTCTAACCCCTAAGTCAT           | 231-1772          | 1050-1262                       | Signal70          | TFGMS1098                             | 54.9                              | 156                            | NV                                                         | NV                                                    | NV                                                                                                             |
| PUIID16586072  | 0           | 0                       | (GTG)4                       | 12                                | GATCCAAGGCTGTTGAAGT              | GCTACCAACCATGAACCTCTCTC          | 53-670            | 68-265                          | CSD               | TFGMS1099                             | 55.2                              | 155                            | NV                                                         | NV                                                    | NV                                                                                                             |
| PUIID16586073  | Ca7         | 13905777                | (GAA)4                       | 12                                | GTGTTCCACACCTTACAAACT            | AGTAAACCGATGGGTACAAACT           | 228-1463          | 249-1115                        | Tub               | TFGMS1100                             | 54.8                              | 149                            | NV                                                         | NV                                                    | NV                                                                                                             |
| PUIID16586074  | Ca4         | 43512703                | (TCT)4                       | 12                                | TCCTATATTTCCTACTCCTCT            | GCAGTATGTGTTTGTGAATCC            | 85-789            | 541-672                         | HLH               | TFGMS1101                             | 54.5                              | 146                            | NV                                                         | NV                                                    | NV                                                                                                             |
| PUIID16586075  | Ca7         | 8421284                 | (CTG)4                       | 12                                | AAAGAAGCAATAATCCAGAGG            | TGCTTGATTGATATCTCCAT             | 140-952           | 242-577                         | Response-reg      | TFGMS1102                             | 55.3                              | 150                            | NV                                                         | NV                                                    | NV                                                                                                             |
| PUIID16586076  | Ca4         | 35393450                | (CGC)4                       | 12                                | GGTTCAGTTCTGAACAAGATG            | GTTGATGATGAACAAGCAAGAT           | 61-705            | 157-321                         | TCP               | TFGMS1103                             | 54.9                              | 192                            | NV                                                         | NV                                                    | NV                                                                                                             |
| PUIID16586077  | Ca8         | 3998282                 | (TCA)4                       | 12                                | AAGCTACTGAAGTTGGTGACTA           | TTGAGGAATCTTTGTCAAGTC            | 181-684           | 238-387                         | AP2               | TFGMS1104                             | 54.6                              | 165                            | NV                                                         | NV                                                    | NV                                                                                                             |
| PUIID16586078  | Ca5         | 11385849                | (GCA)4                       | 12                                | GTTCAACACAAGAGCTTGCT             | TTAACCTGTGGTTGAGCTTAC            | 159-1967          | 936-1121                        | RRM               | TFGMS1105                             | 54.7                              | 148                            | NV                                                         | NV                                                    | NV                                                                                                             |
| PUIID16586079  | Ca4         | 45186457                | (TGA)3                       | 12                                | ATGGAGGAAATCTGAAACAT             | AAGGAACTGCTGTTGTGAAA             | 2-298             | 49-156                          | HomeoBox          | TFGMS1106                             | 55.2                              | 150                            | NV                                                         | NV                                                    | NV                                                                                                             |
| PUIID16586080  | Ca5         | 41254342                | (TG)6                        | 12                                | AGGAAGAGAAAGAGGACAAGA            | GCTCAAAATATCTAAGCAGAGG           | 546-1784          | 588-722                         | CCT               | TFGMS1107                             | 54.9                              | 134                            | NV                                                         | NV                                                    | NV                                                                                                             |
| PUIID16586081  | 0           | 0                       | (CTA)4                       | 12                                | TGGAACCTTAGGAGAAACAAA            | TGATGATCAAACTCAGAAAAAC           | 36-686            | 168-374                         | TCP               | TFGMS1108                             | 54.3                              | 147                            | NV                                                         | NV                                                    | NV                                                                                                             |
| PUIID16586082  | Ca7         | 2833252                 | (AGC)5                       | 15                                | AGTGGGATACAAAGATGATA             | CAGAACCAACCCCTAACAGTTG           | 375-875           | 462-557                         | GATA              | TFGMS1109                             | 54.9                              | 139                            | 4                                                          | P                                                     | 0.35                                                                                                           |
| PUIID16586083  | Ca1         | 40494061                | (GGT)4                       | 12                                | CATGAACAACATCATCAACAA            | TACCAATAGCTGAACCATGAC            | 218-1237          | 569-1039                        | DUF702            | TFGMS1109                             | 55.3                              | 148                            | 2                                                          | P                                                     | 0.36                                                                                                           |
| PUIID16586084  | Ca3         | 28081736                | (TTG)4                       | 12                                | CTTCAATCACTCAAAACGAG             | TTGTGATCTGAAAAGGAAGAA            | 277-3637          | 1624-1802                       | zZIP              | TFGMS1109                             | 54.8                              | 149                            | NA                                                         | NA                                                    | NA                                                                                                             |
| PUIID16586085  | 0           | 0                       | (CAA)5                       | 15                                | TTGGGTCAACAAATATGAGTC            | TTGTTCTTGAACCCCTTAACAA           | 437-1648          | 1285-1438                       | F0F1 ATP synthase | TFGMS1109                             | 55.1                              | 149                            | 1                                                          | M                                                     | NSA                                                                                                            |
| PUIID16586086  | Ca4         | 2153465                 | (GAA)5                       | 15                                | AAGATGACATGGAGGAAGAC             | ACTCGAATATCTCTGGCATT             | 9-1310            | 771-875                         | HLH               | TFGMS1109                             | 55.0                              | 172                            | 1                                                          | M                                                     | NSA                                                                                                            |

| NCBI Probe IDs | Chromosomes | Physical positions (bp) | Microsatellite repeat-motifs | Microsatellite repeat length (bp) | Forward Primer sequences (5'-3') | Reverse Primer sequences (5'-3') | ORF position (bp) | Functional domain position (bp) | Functional domain | Types of genic microsatellite markers | Actual annealing temperature (°C) | Size (bp) of alleles amplified | Total number of alleles amplified among chickpea varieties | Polymorphic potential monomorphic (M)/polymorphic (P) | R2 value of marker loci showing significant association ( $P \leq 0.05$ ) with three major seed and pod traits |
|----------------|-------------|-------------------------|------------------------------|-----------------------------------|----------------------------------|----------------------------------|-------------------|---------------------------------|-------------------|---------------------------------------|-----------------------------------|--------------------------------|------------------------------------------------------------|-------------------------------------------------------|----------------------------------------------------------------------------------------------------------------|
| PUID16586087   | 0           |                         | (GTG)5                       | 15                                | GCTGCTCCAGATCTGTTCC              | TCACCTGAAATCACCACCA              | 3-563             | 21-252                          | SelP              | TFDMS6-TYPE-II                        | 60.0                              | 244                            | 1                                                          | M                                                     | NSA                                                                                                            |
| PUID16586088   | Ca7         | 21322216                | (GAC)6                       | 18                                | GCAAACTTCCAAAAGTGAT              | TGTTTTCTCCAGAACTAGGGA            | 331-978           | 468-610                         | Peptidase         | TFDMS7-TYPE-II                        | 60.0                              | 230                            | 1                                                          | M                                                     | NSA                                                                                                            |
| PUID16586089   | Ca3         | 39816713                | (GCA)6                       | 18                                | TGATGGAGTTGATGCAAGGA             | CTCTTCTCTTGTGCTGCT               | 479-1678          | 288-552                         | B3                | TFDMS8-TYPE-II                        | 60.2                              | 176                            | 1                                                          | M                                                     | NSA                                                                                                            |
| PUID16586090   | Ca3         | 39817055                | (GGA)5                       | 15                                | AGGAGGAGTAGATATGATGG             | TGCCAGTTAGTTTGTGTGT              | 479-1678          | 764-1003                        | B3                | TFDMS9-TYPE-II                        | 54.8                              | 156                            | 1                                                          | M                                                     | NSA                                                                                                            |
| PUID16586091   | Ca5         | 31241164                | (ACG)4                       | 12                                | GGATCTTCAAAAACGATCTCT            | AACCATGTTTACTGTCAGTCG            | 53-2030           | 479-718                         | Bromodomain       | TFDMS10-TYPE-II                       | 55.1                              | 143                            | 1                                                          | M                                                     | NSA                                                                                                            |
| PUID16586092   | Ca1         | 17343358                | (AGA)5                       | 15                                | TCTGGTCACAGTGGCACTTC             | GCCACAAGTCGTGCTTTACA             | 15-482            | 366-435                         | RVT2              | TFDMS11-TYPE-II                       | 59.9                              | 236                            | 1                                                          | M                                                     | NSA                                                                                                            |
| PUID16586093   | Ca1         | 6738568                 | (ACACCA)3                    | 18                                | GATCAGCAGTCAAAACAAGAC            | TAGTTTATGGGTTTCCACCA             | 110-1060          | 776-931                         | Myb DNA binding   | TFDMS12-TYPE-II                       | 55.0                              | 162                            | 1                                                          | M                                                     | NSA                                                                                                            |
| PUID16586094   | Ca7         | 5634910                 | (AGTGGG)3                    | 18                                | TAAGAATCGATTATGCAAGG             | CTGAGTTCAGTTTGGTTCGT             | 345-1304          | 909-1172                        | Myb DNA binding   | TFDMS13-TYPE-II                       | 54.8                              | 206                            | 1                                                          | M                                                     | NSA                                                                                                            |
| PUID16586095   | Ca1         | 13302369                | (TC)6                        | 12                                | ATTTTGGCGTAATTCGGTG              | TCCCAACCTGAAAAACAAAG             | 130-1236          | 195-1089                        | DUF789            | TFDMS14-TYPE-II                       | 59.8                              | 183                            | 1                                                          | M                                                     | NSA                                                                                                            |
| PUID16586096   | Ca1         | 6631474                 | (GAA)6                       | 18                                | TCAAAAACAAATGGGTCCAA             | TGCGATCAAACTCTGAGTCT             | 71-682            | 123-531                         | DUF2431           | TFDMS15-TYPE-II                       | 60.2                              | 273                            | 1                                                          | M                                                     | NSA                                                                                                            |
| PUID16586097   | Ca7         | 8015985                 | (TCA)4                       | 12                                | GCACAACCTAGTAAGTGTGTG            | AAATCCTCCAAGGAAAAAGA             | 117-1184          | 273-473                         | TCP               | TFDMS16-TYPE-II                       | 54.3                              | 152                            | 1                                                          | M                                                     | NSA                                                                                                            |
| PUID16586098   | Ca5         | 37147435                | (AC)4                        | 12                                | ACGGTGAACTAACCTCTCAAT            | GTGATAGCAGTGAAGTTACCA            | 229-1044          | 412-588                         | Zn-HD-dimer       | TFDMS17-TYPE-II                       | 55.4                              | 159                            | 1                                                          | M                                                     | NSA                                                                                                            |
| PUID16586099   | Ca8         | 4243300                 | (TCC)5                       | 15                                | TCCAAAAAGGAACAACACA              | CCCCGTTTGAGAGAGTACCA             | 61-791            | 99-348                          | MADF              | TFDMS18-TYPE-II                       | 60.4                              | 199                            | 1                                                          | M                                                     | NSA                                                                                                            |
| PUID16586100   | Ca4         | 45053532                | (AAC)4                       | 12                                | TGAAAAAGGTACGCCAAAC              | CCTTCAAAATCTGAATTTTCC            | 34-858            | 505-609                         | GATA              | TFDMS19-TYPE-II                       | 54.6                              | 149                            | 1                                                          | M                                                     | NSA                                                                                                            |
| PUID16586101   | Ca7         | 17597964                | (AGC)5                       | 15                                | TAGCCACATCCAGGAAAAAC             | AATCGAAACACGAAGTCGAG             | 73-672            | 366-513                         | DUF1639           | TFDMS20-TYPE-II                       | 59.9                              | 227                            | 1                                                          | M                                                     | NSA                                                                                                            |
| PUID16586102   | Ca6         | 58555002                | (AGAGGA)3                    | 18                                | AACATCTTCAGGGTCAACTTG            | CACAGCAGGAGCCCAATAG              | 499-972           | 586-765                         | bZIP              | TFDMS21-TYPE-II                       | 55.4                              | 157                            | 1                                                          | M                                                     | NSA                                                                                                            |
| PUID16586103   | Ca3         | 31977211                | (AT)4                        | 12                                | AGGATGTGATTTTGAATCTG             | TGAATCAGGTGTGAATCCTTG            | 169-1638          | 894-1122                        | HLH               | TFDMS22-TYPE-II                       | 54.3                              | 163                            | 1                                                          | M                                                     | NSA                                                                                                            |
| PUID16586104   | Ca5         | 28253414                | (CTG)4                       | 12                                | AACCTCAACATGATTGGCTA             | GAAGGTGAAAACTCAGGAAT             | 19-588            | 58-360                          | DUF280            | TFDMS23-TYPE-II                       | 55.0                              | 151                            | 1                                                          | M                                                     | NSA                                                                                                            |
| PUID16586105   | Ca4         | 1220485                 | (AT)4                        | 12                                | CAAGAAGTTTCTCCACCTCA             | TGATCTTTGATTGTGAGAGT             | 78-839            | 402-500                         | AP2               | TFDMS24-TYPE-II                       | 54.7                              | 155                            | 1                                                          | M                                                     | NSA                                                                                                            |
| PUID16586106   | Ca2         | 14624000                | (GCA)4                       | 12                                | CTTTAATCATGCCAGCTCTAC            | TTTCGTTTCTCTTCCTCTCT             | 225-998           | 540-950                         | DUF3594           | TFDMS25-TYPE-II                       | 54.4                              | 165                            | 1                                                          | M                                                     | NSA                                                                                                            |
| PUID16586107   | Ca5         | 43355916                | (GAA)4                       | 12                                | CTCTCATCACAATCTGCCAT             | CTTCTCAGAGTGATGTCTCGT            | 387-1316          | 561-722                         | HomeoBox          | TFDMS26-TYPE-II                       | 55.0                              | 143                            | 1                                                          | M                                                     | NSA                                                                                                            |
| PUID16586108   | 0           | 0                       | (GGC)4                       | 12                                | GATTTGATTTTCTGGGTTCTC            | CATAACCGATCATCAATCATA            | 405-1076          | 477-572                         | AP2               | TFDMS27-TYPE-II                       | 55.4                              | 150                            | 1                                                          | M                                                     | NSA                                                                                                            |
| PUID16586109   | Ca4         | 45445882                | (TTG)4                       | 12                                | GGCAATATGGTGTGGAGTA              | AAAAAGAAGCTTTGGGTAAG             | 1-583             | 344-475                         | Myb DNA binding   | TFDMS28-TYPE-II                       | 55.3                              | 185                            | 1                                                          | M                                                     | NSA                                                                                                            |
| PUID16586110   | Ca8         | 5768514                 | (AAT)7                       | 21                                | CAGTACGGTAAGATGAAGGA             | CAACAGCAACATGTGTTGTA             | 64-480            | 82-237                          | HomeoBox          | TFDMS29-TYPE-II                       | 54.6                              | 162                            | 1                                                          | M                                                     | NSA                                                                                                            |
| PUID16586111   | Ca3         | 31248988                | (AAC)4                       | 12                                | TTATCATCCAATGATGAATCC            | ATCCTGAAGAGTGAATTCAT             | 100-669           | 403-504                         | AP2               | TFDMS30-TYPE-II                       | 54.8                              | 155                            | 1                                                          | M                                                     | NSA                                                                                                            |
| PUID16586112   | Ca3         | 3617519                 | (CCA)4                       | 12                                | AACCAGAAGAACCAACCACTT            | TAAGATGAAGAGATCGGAAGT            | 368-1354          | 575-736                         | Zn-HD             | TFDMS31-TYPE-II                       | 56.2                              | 142                            | 1                                                          | M                                                     | NSA                                                                                                            |
| PUID16586113   | Ca7         | 11324531                | (TGGGT)3                     | 15                                | GTTTGAGTCCGGTGTTTTGT             | ACAACCTATTCTCCGTCTCT             | 17-544            | 188-325                         | bZIP              | TFDMS32-TYPE-II                       | 55.1                              | 158                            | 1                                                          | M                                                     | NSA                                                                                                            |
| PUID16586114   | 0           | 0                       | (TCT)4                       | 12                                | CAAATCAGATGGTGAACAAT             | GATGTAAACATGATCCACCA             | 117-1022          | 260-474                         | TCP               | TFDMS33-TYPE-II                       | 55.1                              | 156                            | 1                                                          | M                                                     | NSA                                                                                                            |
| PUID16586115   | Ca3         | 6887527                 | (AAGA)3                      | 12                                | TCATCTTCTCCTTCTTCTCT             | AGGAATTTCTGCTGCTCTCT             | 1-741             | 142-276                         | Myb DNA binding   | TFDMS34-TYPE-II                       | 55.2                              | 150                            | 1                                                          | M                                                     | NSA                                                                                                            |
| PUID16586116   | Ca1         | 8828268                 | (AGA)5                       | 15                                | AAATTAAAGATCCGTGGTCAAT           | TGGATCCAACCAATTAATCATA           | 113-805           | 320-704                         | WRKY              | TFDMS35-TYPE-II                       | 55.3                              | 154                            | 1                                                          | M                                                     | NSA                                                                                                            |
| PUID16586117   | Ca5         | 37896821                | (TTG)4                       | 12                                | GGTATGACCAGAACATTTGAA            | AACATCAATTCAATCATGGAG            | 299-940           | 581-790                         | Histone           | TFDMS36-TYPE-II                       | 55.1                              | 142                            | 1                                                          | M                                                     | NSA                                                                                                            |
| PUID16586118   | Ca3         | 81357                   | (TTC)4                       | 12                                | ACGCTTCAAGATTGAACAAC             | CCAAATGTGCTGTTTATCT              | 203-922           | 506-886                         | NAM               | TFDMS37-TYPE-II                       | 54.7                              | 150                            | 1                                                          | M                                                     | NSA                                                                                                            |
| PUID16586119   | Ca5         | 36652764                | (CAA)4                       | 12                                | CATGGAAACAAAGAAGAGATTG           | TCCTTATTTTCTGCTACCCACT           | 297-779           | 390-536                         | AP2               | TFDMS38-TYPE-II                       | 55.0                              | 147                            | 1                                                          | M                                                     | NSA                                                                                                            |
| PUID16586120   | Ca8         | 9320749                 | (GAT)4                       | 12                                | TGAAGAAGAAGAGCAGAGTC             | ACAACCAAGATACTCTGCAG             | 71-949            | 803-946                         | Zn-Dof            | TFDMS39-TYPE-II                       | 54.1                              | 163                            | 1                                                          | M                                                     | NSA                                                                                                            |
| PUID16586121   | Ca7         | 32856022                | (GAA)4                       | 12                                | GAAAGTGTGTTGTGTTGATTTG           | TCTTCAACAACAACAACAACA            | 125-1216          | 854-1030                        | WRC               | TFDMS40-TYPE-II                       | 55.0                              | 151                            | 1                                                          | M                                                     | NSA                                                                                                            |
| PUID16586122   | Ca7         | 31541402                | (AGA)4                       | 12                                | AGTTACAATTGATGGTATGG             | AAAAGGTATTGGACAAAAGGT            | 159-794           | 582-752                         | Zn-Dof            | TFDMS41-TYPE-II                       | 54.9                              | 138                            | 1                                                          | M                                                     | NSA                                                                                                            |
| PUID16586123   | Ca3         | 35530256                | (AAG)4                       | 12                                | GACAAAGGAGAAGAAATGGAT            | GCTTTTGTGTGGTATTTGAG             | 1-398             | 90-289                          | ovate             | TFDMS42-TYPE-II                       | 55.0                              | 153                            | 1                                                          | M                                                     | NSA                                                                                                            |
| PUID16586124   | 0           | 0                       | (TCT)4                       | 12                                | CAAATCAGATGGTGAACAAT             | CCAGAAGACAAAGAACAAGAA            | 36-686            | 168-374                         | TCP               | TFDMS43-TYPE-II                       | 55.1                              | 156                            | 1                                                          | M                                                     | NSA                                                                                                            |
| PUID16586125   | Ca1         | 10682877                | (TCATGA)4                    | 24                                | ATCATCATGAAGCATCCATAG            | TATCGGATATAGCTTTTGAC             | 18-362            | 219-359                         | GRAS              | TFDMS44-TYPE-II                       | 55.1                              | 156                            | 1                                                          | M                                                     | NSA                                                                                                            |
| PUID16586126   | Ca5         | 164592                  | (GAT)6                       | 18                                | ATGAGTCAAAGCAGTAGTCAC            | GGGAGAGGGAGTAAACAAGTA            | 23-1294           | 194-571                         | NAM               | TFDMS45-TYPE-II                       | 54.4                              | 153                            | 5                                                          | P                                                     | NSA                                                                                                            |
| PUID16586127   | Ca7         | 32855979                | (TTG)7                       | 21                                | TTATTGTTTCTCAAGGAAAGG            | GTGGAACCTGTTTCTCTCTCT            | 145-1233          | 874-1008                        | WRC               | TFDMS46-TYPE-II                       | 54.6                              | 146                            | 4                                                          | P                                                     | NSA                                                                                                            |
| PUID16586128   | Ca7         | 2833134                 | (GGC)4                       | 12                                | CAACTGTAGGGTTTGTGTCTG            | ATCAACTGTCATCACACCATT            | 375-875           | 462-557                         | GATA              | TFDMS47-TYPE-II                       | 55.0                              | 170                            | 2                                                          | P                                                     | NSA                                                                                                            |
| PUID16586129   | Ca4         | 35416327                | (TGT)5                       | 15                                | TTGGCATACGATATCTTCTTC            | CGTCTCGGACATCTTAATTTC            | 1046-1738         | 1478-1642                       | TCP               | TFDMS48-TYPE-II                       | 54.7                              | 153                            | 3                                                          | P                                                     | NSA                                                                                                            |
| PUID16586130   | Ca7         | 20545387                | (ACA)5                       | 15                                | ACGTGTTGACCCAAAAGTGGC            | TCCATGTGAAACTGGTTGGA             | 291-2417          | 546-1806                        | Xan               | TFDMS49-TYPE-II                       | 60.0                              | 216                            | 2                                                          | P                                                     | NSA                                                                                                            |
| PUID16586131   | Ca2         | 27760734                | (GAA)4                       | 12                                | GTGATGCATTTGTTTGAAT              | TAGATCTTTTGTGTTTGGG              | 353-862           | 352-526                         | B3                | TFDMS50-TYPE-II                       | 55.3                              | 147                            | 2                                                          | P                                                     | NSA                                                                                                            |
| PUID16586132   | Ca3         | 39817055                | (GAA)5                       | 15                                | AGGAGGAGTAGATATGATGG             | TTGAGCATAGAGCTCCAATTA            | 479-1678          | 764-1003                        | B3                | TFDMS51-TYPE-II                       | 54.8                              | 156                            | 2                                                          | P                                                     | NSA                                                                                                            |
| PUID16586133   | Ca6         | 21497375                | (AAT)5                       | 15                                | ATTGTCACAAGTTGTCAATGAT           | TGTTATGCAGCTTGCTAACTG            | 294-1247          | 846-1007                        | Bzip              | TFDMS52-TYPE-II                       | 54.8                              | 148                            | 2                                                          | P                                                     | NSA                                                                                                            |
| PUID16586134   | Ca5         | 223659                  | (ACC)5                       | 15                                | GAGTGGTGTGGTGGTAGTTTA            | TAACCTACCACCATCACCAGTC           | 265-1221          | 793-948                         | ZF HD dimer       | TFDMS53-TYPE-II                       | 55.0                              | 137                            | 2                                                          | P                                                     | NSA                                                                                                            |
| PUID16586135   | Ca3         | 7104895                 | (CAA)4                       | 12                                | CAAAACACTTCTTCCCTCTCTCA          | TGAGATGCTCTCAGAACCTGAA           | 33-1031           | 189-338                         | HLH               | TFDMS54-TYPE-II                       | 54.7                              | 159                            | 2                                                          | P                                                     | NSA                                                                                                            |
| PUID16586136   | Ca2         | 11922573                | (CCG)4                       | 12                                | CTCCAACATGTTGTGCTATT             | ACTACTTCAACCTGAGCTCGT            | 52-1329           | 874-1144                        | TCP               | TFDMS55-TYPE-II                       | 55.3                              | 158                            | 3                                                          | P                                                     | NSA                                                                                                            |
| PUID16586137   | 0           | 0                       | (ATT)7                       | 21                                | GAGGTGAAAAATGGGGAAT              | CCAAGTCTGATGTGTGTCAT             | 99-1076           | 354-522                         | WRKY              | TFDMS56-TYPE-II                       | 60.0                              | 186                            | 3                                                          | P                                                     | NSA                                                                                                            |
| PUID16586138   | Ca2         | 10253308                | (AAC)7                       | 21                                | GCAACGACGGGAAAAACAGT             | TCAGCAACGTTGGAGTCTTG             | 163-1092          | 288-420                         | Myb DNA binding   | TFDMS57-TYPE-II                       | 60.3                              | 160                            | 3                                                          | P                                                     | NSA                                                                                                            |
| PUID16586139   | Ca3         | 26827414                | (ACC)5                       | 15                                | GCAAGGTTGCAAAACAAGTA             | AAGGGACAATTTGGTGGTGA             | 73-1467           | 204-1365                        | Transferase       | TFDMS58-TYPE-II                       | 59.8                              | 205                            | 2                                                          | P                                                     | NSA                                                                                                            |
| PUID16586140   | Ca7         | 19989656                | (CTG)4                       | 12                                | TTAGTTTAGGTCCTGGTGTTT            | GTTTTCCAATTTGAAGTTTC             | 322-1467          | 1102-1179                       | ZnCCCH            | TFDMS59-TYPE-II                       | 55.4                              | 151                            | 2                                                          | P                                                     | NSA                                                                                                            |
| PUID16586141   | Ca2         | 3174683                 | (TCT)7                       | 21                                | GCGCCACAATTCCTGTTCTT             | TCGAAAAATTCGAGTACCCT             | 36-1232           | 147-1194                        | DHOS              | TFDMS60-TYPE-II                       | 60.3                              | 279                            | 2                                                          | P                                                     | NSA                                                                                                            |
| PUID16586142   | Ca7         | 5272678                 | (TCGGAA)3                    | 18                                | TCGTATTGTGCATAGGAGAT             | ACACTTCTCAAAACCTAACCC            | 287-1244          | 1092-1196                       | WD40              | TFDMS61-TYPE-II                       | 54.9                              | 173                            | 2                                                          | P                                                     | NSA                                                                                                            |
| PUID16586143   | Ca3         | 37212719                | (ATATGA)4                    | 24                                | ACGATGCAATCGAATATCTTA            | AATTCCTGAAGCTGCTTTTGG            | 400-948           | 457-594                         | HLH               | TFDMS62-TYPE-II                       | 55.0                              | 150                            | 3                                                          | P                                                     | NSA                                                                                                            |
| PUID16586144   | Ca3         | 26594189                | (AATGAA)4                    | 24                                | AATAGTCCAAGGGTGAGAA              | TGACTCATTTGTTGTTGTCT             | 99-923            | 702-909                         | GATA              | TFDMS63-TYPE-II                       | 55.5                              | 142                            | 4                                                          | P                                                     | NSA                                                                                                            |
| PUID16586145   | Ca3         | 30974188                | (AAT)3                       | 12                                | GTACCCCTCCCTTCTGTAATA            | AAGAACTATGCAGCAACAATA            | 483-920           | 513-899                         | AUX IAA           | TFDMS64-TYPE-II                       | 55.0                              | 146                            | 2                                                          | P                                                     | NSA                                                                                                            |
| PUID16586146   | Ca7         | 38472298                | (CAGACC)3                    | 18                                | ATGTCCATGCAAGTAAACAAG            | CGAGGACCTCTACCTCTACT             | 8-1024            | 218-538                         | TCP               | TFDMS65-TYPE-II                       | 55.3                              | 137                            | 2                                                          | P                                                     | NSA                                                                                                            |
| PUID16586147   | 0           | 0                       | (GAT)5                       | 15                                | AAATCGCACACAACAAGCTG             | CAGTTTCGTCTCGACATGA              | 137-688           | 6-393                           | IPP-2             | TFDMS66-TYPE-II                       | 59.9                              | 254                            | 3                                                          | P                                                     | NSA                                                                                                            |
| PUID16586148   | Ca8         | 4243323                 | (TCC)5                       | 15                                | AACCTAGCTTCTCCAACATTC            | ATAATTCTCTCCGCAAAATCT            | 61-791            | 130-348                         | Myb DNA binding   | TFDMS67-TYPE-II                       | 55.2                              | 150                            | 3                                                          | P                                                     | NSA                                                                                                            |

| NCBI Probe IDs | Chromosomes | Physical positions (bp) | Microsatellite repeat-motifs | Microsatellite repeat length (bp) | Forward Primer sequences (5'-3') | Reverse Primer sequences (5'-3') | ORF position (bp) | Functional domain position (bp) | Functional domain                           | Types of genic microsatellite markers | Actual annealing temperature (°C) | Size (bp) of alleles amplified | Total number of alleles amplified among chickpea varieties | Polymorphic potential monomorphic (M)/polymorphic (P) | R2 value of marker loci showing significant association ( $P \leq 0.05$ ) with three major seed and pod traits |
|----------------|-------------|-------------------------|------------------------------|-----------------------------------|----------------------------------|----------------------------------|-------------------|---------------------------------|---------------------------------------------|---------------------------------------|-----------------------------------|--------------------------------|------------------------------------------------------------|-------------------------------------------------------|----------------------------------------------------------------------------------------------------------------|
| PUIID16586149  | Ca8         | 4421282                 | (CAA)4                       | 12                                | GCAACTTATATTGGTCCTCAA            | CAAAGTCAAAGAAGGAGACAA            | 175-1071          | 196-498                         | DUF260                                      | TFDMS68-TYPE-II                       | 54.5                              | 152                            | 2                                                          | P                                                     | NSA                                                                                                            |
| PUIID16586150  | Ca1         | 35114861                | (TGA)4                       | 12                                | GTGGGAACAAGAGAGAGT               | GGCTCTCAGAAAATCCCTT              | 355-1137          | 652-816                         | Homebox                                     | TFDMS69-TYPE-II                       | 55.1                              | 146                            | 2                                                          | P                                                     | NSA                                                                                                            |
| PUIID16586151  | Ca8         | 4626215                 | (CCT)6                       | 18                                | TTGATTAAAGGCTCTCTGCTG            | ATACCAACACCAACACACAC             | 105-2279          | 918-1322                        | POX                                         | TFDMS70-TYPE-II                       | 55.2                              | 150                            | 3                                                          | P                                                     | NSA                                                                                                            |
| PUIID16586152  | Ca1         | 3999529                 | (AAC)5                       | 15                                | CTCTCAAGATCAACACTTTCC            | GAGAGATGCTATGTGTTTTCG            | 226-1611          | 445-651                         | TCP                                         | TFDMS71-TYPE-II                       | 54.8                              | 140                            | 5                                                          | P                                                     | NSA                                                                                                            |
| PUIID16586153  | Ca3         | 25672716                | (GAA)4                       | 12                                | GACTGTTGTACTGCTGGAGA             | TGTCATCTTGCTAATCTTTG             | 199-1638          | 1063-1200                       | HLH                                         | TFDMS72-TYPE-II                       | 55.2                              | 149                            | 2                                                          | P                                                     | NSA                                                                                                            |
| PUIID16586154  | 0           | 0                       | (AAAGAG)3                    | 18                                | ACCACAACATGTCTCAAATC             | CTAAGATGGTCATTCAATTGG            | 554-1651          | 1073-1219                       | HLH                                         | TFDMS73-TYPE-II                       | 55.0                              | 153                            | 4                                                          | P                                                     | NSA                                                                                                            |
| PUIID16586155  | Ca6         | 29746111                | (GAT)4                       | 12                                | AGGACAGTGTACACAGAGTTG            | TTCCAGAAAAGGAGAAAGTGAA           | 439-885           | 445-813                         | YABBY                                       | TFDMS74-TYPE-II                       | 55.3                              | 149                            | 2                                                          | P                                                     | NSA                                                                                                            |
| PUIID16586156  | 0           | 0                       | (GAT)4                       | 12                                | AAAATCTCTCGGGTTGACTC             | GTTTCCGTATCCTTGATCTCT            | 26-888            | 809-864                         | hZIP                                        | TFDMS75-TYPE-II                       | 55.0                              | 153                            | 2                                                          | P                                                     | NSA                                                                                                            |
| PUIID16586157  | Ca1         | 2346126                 | (AAC)6                       | 18                                | TGGGTTTGAGTTCTAAACAAG            | CATTTCACAGCTTCGTATTGT            | 342-636           | 480-635                         | Zi-Dof                                      | TFDMS76-TYPE-II                       | 54.6                              | 151                            | 5                                                          | P                                                     | NSA                                                                                                            |
| PUIID16586158  | Ca2         | 23951109                | (TGA)4                       | 12                                | TGTCCTATCTGAAAAGATTGA            | TGGTTTCTTCATCAACAAC              | 132-1220          | 159-1004                        | AUX-IAA                                     | TFDMS77-TYPE-II                       | 55.1                              | 150                            | 2                                                          | P                                                     | NSA                                                                                                            |
| PUIID16586159  | Ca4         | 45595013                | (GTA)5                       | 15                                | GGCGGAATAATTGAAGTAGTAG           | CAATTACATGGGAAGTTC               | 126-2153          | 1350-1484                       | WRC                                         | TFDMS78-TYPE-II                       | 55.0                              | 158                            | 3                                                          | P                                                     | NSA                                                                                                            |
| PUIID16586160  | 0           | 0                       | (AAC)4                       | 12                                | GAGAGAACAAACCCCTCGATT            | TGTAACACTCATCCACCAC              | 117-1022          | 260-474                         | TCP                                         | TFDMS79-TYPE-II                       | 55.0                              | 150                            | 2                                                          | P                                                     | NSA                                                                                                            |
| PUIID16586161  | Ca4         | 470897                  | (AAG)4                       | 12                                | AAAAGAAGATCTCGAAGGAAG            | ACTGTTCATAATCCCCATAGC            | 78-497            | 225-425                         | Histone                                     | TFDMS80-TYPE-II                       | 54.6                              | 152                            | 2                                                          | P                                                     | NSA                                                                                                            |
| PUIID16586162  | Ca6         | 4566075                 | (TTTTTC)4                    | 24                                | ACAACCTTACTGCTGTGGAAA            | ATTTCAAAATGCTTCGTGAAAC           | 397-912           | 421-636                         | PC4                                         | TFDMS81-TYPE-II                       | 55.0                              | 147                            | 3                                                          | P                                                     | NSA                                                                                                            |
| PUIID16586163  | 0           | 0                       | (AGA)4                       | 12                                | TCATCAGAAGCAAGAGAAGA             | AAAACTCTATTTGCTGACCA             | 141-692           | 543-608                         | AP2                                         | TFDMS82-TYPE-II                       | 55.4                              | 148                            | 2                                                          | P                                                     | NSA                                                                                                            |
| PUIID16586164  | Ca7         | 32855979                | (TTG)7                       | 21                                | TTATTGTTGTTCAAGGAAGG             | GTGGAACCTGTTCTTCTCTCT            | 125-1216          | 854-1030                        | WRC                                         | TFDMS83-TYPE-II                       | 54.6                              | 146                            | 2                                                          | P                                                     | NSA                                                                                                            |
| PUIID16586165  | Ca1         | 9791512                 | (AAT)4                       | 12                                | AGGTAATGATGATGATGATGG            | TGTTTTCTCATCAGGATGG              | 40-444            | 343-429                         | HomeoBox                                    | TFDMS84-TYPE-II                       | 54.8                              | 148                            | 2                                                          | P                                                     | NSA                                                                                                            |
| PUIID16586166  | Ca1         | 9791574                 | (ATG)5                       | 15                                | AATTCAGGTCTCAAAAATCC             | GAGCAGTGTGCCTATGATATT            | 40-444            | 343-429                         | HomeoBox                                    | TFDMS85-TYPE-II                       | 54.8                              | 151                            | 2                                                          | P                                                     | NSA                                                                                                            |
| PUIID16586167  | Ca4         | 35416175                | (CA)5                        | 15                                | AAACAACCTAACGCCGTAACTA           | TTGGCATACGTTATCTCTTTC            | 61-705            | 157-321                         | TCP                                         | TFDMS86-TYPE-II                       | 54.5                              | 153                            | 3                                                          | P                                                     | NSA                                                                                                            |
| PUIID16586168  | 0           | 0                       | (AAC)4                       | 12                                | GAGAGAACAAACCCCTCGATT            | TCTTCTCTCTCTTCAACTTT             | 36-686            | 168-374                         | TCP                                         | TFDMS87-TYPE-II                       | 55.0                              | 150                            | 2                                                          | P                                                     | NSA                                                                                                            |
| PUIID16586169  | Ca4         | 1124457                 | (CAC)5                       | 15                                | TGTAGCCTCACCAACGACAC             | AGGGCGGTGATTTCTAAGGT             | 29-736            | 171-510                         | DUF640                                      | TFDMS1-TYPE-I                         | 59.9                              | 186                            | 3                                                          | P                                                     | 0.35                                                                                                           |
| PUIID16586170  | Ca8         | 5412472                 | (ACA)5                       | 15                                | AAGAAGGATTGTCCTCATGTT            | CACCTATCTGTGCGCACTTTT            | 589-1512          | 895-1320                        | DUF702                                      | TFDMS2-TYPE-I                         | 55.3                              | 146                            | 2                                                          | P                                                     | 0.35                                                                                                           |
| PUIID16586171  | Ca7         | 11430204                | (ACA)4                       | 12                                | CCCCAAGACTAGTTCAACTTT            | CGTTTAACTCCAGATGAGTT             | 6-983             | 429-974                         | GRAS                                        | TFDMS3-TYPE-I                         | 55.2                              | 133                            | 3                                                          | P                                                     | 0.36                                                                                                           |
| PUIID16586172  | Ca4         | 7121052                 | (AGT)5                       | 15                                | GTGGTGCAACGATAGTAAGTCT           | TCAAAACAAGTTCTCTGCTCTCT          | 724-1293          | 732-810                         | WRKY                                        | TFDMS4-TYPE-I                         | 54.9                              | 156                            | 3                                                          | P                                                     | 0.37                                                                                                           |
| PUIID16586173  | Ca4         | 43513782                | (GAA)5                       | 15                                | GAAAGAAGATCAACAGCCTTTG           | CAAGGTATCTTGAAGTGGTTG            | 573-1883          | 1401-1847                       | bHLH MYC                                    | TFDMS5-TYPE-I                         | 55.3                              | 155                            | 5                                                          | P                                                     | 0.37                                                                                                           |
| PUIID16586174  | Ca4         | 5018413                 | (CTG)4                       | 12                                | GTTCCTGAGAGTGCTCCAAG             | ATGATATGGGAGTCAACAATG            | 307-1599          | 336-716                         | bZIP                                        | TFDMS6-TYPE-I                         | 55.1                              | 153                            | 2                                                          | P                                                     | 0.37                                                                                                           |
| PUIID16586175  | Ca5         | 40667569                | (ACC)10                      | 30                                | GTCACTTTACGCTCTCTCG              | ATCACGAGAGTCTGCGGAAG             | 558-1781          | 384-714                         | EamA                                        | TFDMS7-TYPE-I                         | 60.0                              | 192                            | 6                                                          | P                                                     | 0.33                                                                                                           |
| PUIID16586176  | Ca4         | 5080649                 | (AAT)4                       | 12                                | GAGAAGAGGATATTGGGAGA             | CTAACTCCAACATTCCTGTG             | 135-1787          | 1365-1622                       | Myb DNA binding                             | TFDMS8-TYPE-I                         | 55.0                              | 151                            | 3                                                          | P                                                     | 0.34                                                                                                           |
| PUIID16586177  | Ca4         | 16278173                | (TTA)4                       | 12                                | TGCAATGATTACTGCATCATCA           | ATTCAATAGCTCGAAGACCATT           | 1-1145            | 333-467                         | CCT                                         | TFDMS9-TYPE-I                         | 55.3                              | 134                            | 4                                                          | P                                                     | 0.33                                                                                                           |
| PUIID16586178  | 0           | 0                       | (TGT)4                       | 12                                | CTGGTGAGATTTCTGAGAATG            | TTGGAATAGGTATTTGGATAGT           | 224-2434          | 230-1321                        | GRAS                                        | TFDMS10-TYPE-I                        | 54.9                              | 128                            | 3                                                          | P                                                     | 0.31                                                                                                           |
| PUIID16586179  | 0           | 0                       | (CAA)6                       | 18                                | TGCTTCACCTTGTCATCTCG             | CGCTTGGTTCCACAATCTT              | 218-1237          | 354-822                         | DUF702                                      | TFDMS11-TYPE-I                        | 60.0                              | 259                            | 3                                                          | P                                                     | 0.32                                                                                                           |
| PUIID16586180  | Ca6         | 24448426                | (AGA)4                       | 12                                | GAATTAATATCTCCGACCAG             | GGACATCTTTCTGAAACTGAA            | 183-1043          | 381-518                         | Myb DNA binding                             | TFDMS12-TYPE-I                        | 55.4                              | 122                            | 2                                                          | P                                                     | 0.32                                                                                                           |
| PUIID16586181  | Ca3         | 38689529                | (TAC)5                       | 15                                | ACAAGGGTACTTTGGAATTTT            | CTTGAATCAACAAGCAACCT             | 58-1188           | 258-976                         | Myb                                         | TFDMS13-TYPE-I                        | 55.3                              | 167                            | 3                                                          | P                                                     | 0.34                                                                                                           |
| PUIID16586182  | Ca6         | 1614988                 | (CTT)4                       | 12                                | TTCTTTCTTACTTGTGGCTTC            | TATATGCAAGGGTGAGAAAGA            | 257-1750          | 1106-1735                       | DUF3633                                     | TFDMS14-TYPE-I                        | 55.0                              | 153                            | 2                                                          | P                                                     | 0.31                                                                                                           |
| PUIID16586183  | Ca1         | 390303                  | (TCT)5                       | 15                                | ATCCAACAACCTTCTCAAC              | GAGGAGGAGGATATTGGTTTA            | 41-1297           | 380-691                         | TCP domain                                  | TFDMS15-TYPE-I                        | 54.9                              | 140                            | 2                                                          | P                                                     | 0.31                                                                                                           |
| PUIID16586184  | Ca1         | 11897074                | (CAA)6                       | 18                                | AAGAGAAGAGATGAAGCACA             | TCAATTCTCTCTTTGTTGA              | 46-855            | 54-534                          | Domain of unknown function (DUF1635)        | TFDMS16-TYPE-I                        | 55.1                              | 150                            | 3                                                          | P                                                     | 0.23                                                                                                           |
| PUIID16586185  | Ca5         | 32788349                | (AGA)4                       | 12                                | GAAAGAAGAAATCCATCCAAG            | TGTTCTGTCCATCTTGCTTAT            | 502-1095          | 609-735                         | HLH                                         | TFDMS17-TYPE-I                        | 55.5                              | 141                            | 2                                                          | P                                                     | 0.32                                                                                                           |
| PUIID16586186  | Ca1         | 11899747                | (GAT)6                       | 18                                | ATGAGTCAAAGCCATAGTCAC            | TGCTTCTTCAGTTGGATGAAA            | 23-1294           | 194-571                         | No apical meristem (NAM)                    | TFDMS18-TYPE-I                        | 55.1                              | 153                            | 3                                                          | P                                                     | 0.33                                                                                                           |
| PUIID16586187  | Ca2         | 354109                  | (GA)13                       | 26                                | ATGGAGGCGAATATATAGGAG            | TTTTAAGAAACAAGCTGGCTTC           | 114-1025          | 12-327                          | LOB domain-containing protein 41 (LBD41)/DU | TFDMS19-TYPE-I                        | 55.1                              | 151                            | 5                                                          | P                                                     | 0.34                                                                                                           |
| PUIID16586188  | Ca1         | 11906203                | (ATA)5                       | 15                                | TGGTGGTTCTAATGAAGATA             | ACCATAATTATCCCAACATT             | 13-981            | 352-852                         | DUF702                                      | TFDMS20-TYPE-I                        | 54.8                              | 155                            | 2                                                          | P                                                     | 0.35                                                                                                           |
| PUIID16586189  | Ca1         | 11903308                | (CAC)8                       | 24                                | CTAAAGAATGGAATGGGATT             | CTCGTTTGTTTGCTCTATTGT            | 159-3215          | 492-728                         | SBP                                         | TFDMS21-TYPE-I                        | 55.0                              | 153                            | 3                                                          | P                                                     | 0.38                                                                                                           |
| PUIID16586190  | Ca7         | 41713061                | (ATA)5                       | 15                                | ATATGGTGGTGCTGATGGT              | GAAACCAGCATCTGTGATGACAA          | 13-981            | 342-840                         | DUF702                                      | TFDMS22-TYPE-I                        | 60.1                              | 206                            | 1                                                          | M                                                     | NSA                                                                                                            |
| PUIID16586191  | Ca4         | 821062                  | (GAA)6                       | 18                                | TTTTGCTGTCACACCAAGCTC            | GGCTAAGCTAAAAAGTCCAGCA           | 483-4514          | 432-1224                        | ABC membrane                                | TFDMS23-TYPE-I                        | 60.0                              | 178                            | 1                                                          | M                                                     | NSA                                                                                                            |
| PUIID16586192  | Ca3         | 38689331                | (AGA)4                       | 12                                | TAATTAGGGTTTGTGAGTGC             | ATGGTGAATGTTTGTACCAAAG           | 58-1188           | 258-976                         | Myb                                         | TFDMS24-TYPE-I                        | 54.6                              | 144                            | 1                                                          | M                                                     | NSA                                                                                                            |
| PUIID16586193  | Ca3         | 38689529                | (AGA)4                       | 12                                | ACAAGGGTACTTTGGAATTT             | AGAACAAGCTATTGCAATTGA            | 58-1188           | 258-976                         | Myb                                         | TFDMS25-TYPE-I                        | 55.3                              | 167                            | 1                                                          | M                                                     | NSA                                                                                                            |
| PUIID16586194  | Ca4         | 23476815                | (AAC)5                       | 15                                | TGTGCCCTTCTTCACTACAA             | GTGCACCATGCTGAATGAG              | 64-696            | 21-252                          | U-box                                       | TFDMS26-TYPE-I                        | 60.0                              | 223                            | 1                                                          | M                                                     | NSA                                                                                                            |
| PUIID16586195  | Ca6         | 16572788                | (TCA)5                       | 15                                | CTATGTCCGACCCGAGTACT             | ATGCCAAACAAGTAAAGGC              | 163-1292          | 144-1989                        | DAO                                         | TFDMS27-TYPE-I                        | 60.0                              | 150                            | 1                                                          | M                                                     | NSA                                                                                                            |
| PUIID16586196  | 0           | 0                       | (GGA)6                       | 18                                | GATTTTCCCTTGTTGTGCTCA            | CAAAACCTTAAAGCTGCTCCA            | 1-918             | 465-696                         | RRM                                         | TFDMS28-TYPE-I                        | 59.9                              | 245                            | 1                                                          | M                                                     | NSA                                                                                                            |
| PUIID16586197  | Ca4         | 46151798                | (TTG)7                       | 21                                | AATGGGTCATTGGATGAAA              | ACCCGAAAGTGCAGATGACT             | 1751623           | 555-1281                        | DUF620                                      | TFDMS29-TYPE-I                        | 60.0                              | 257                            | 1                                                          | M                                                     | NSA                                                                                                            |
| PUIID16586198  | Ca6         | 29195786                | (CAA)6                       | 18                                | TGGGCTTACTACTGCCAAGG             | GCTTGAATATCCAGCAGAGG             | 46-855            | 54-534                          | DUF1635                                     | TFDMS30-TYPE-I                        | 60.3                              | 267                            | 1                                                          | M                                                     | NSA                                                                                                            |
| PUIID16586199  | 0           | 0                       | (TGG)5                       | 15                                | TCAAAAACAGCAGCAACAGC             | GACGGCGCTAACTTCAAAAC             | 189-992           | 366-642                         | DUF668                                      | TFDMS31-TYPE-I                        | 60.2                              | 137                            | 1                                                          | M                                                     | NSA                                                                                                            |
| PUIID16586200  | Ca4         | 19436034                | (TAT)6                       | 18                                | TGAAAGAAGAGAGCCCAAAA             | GCAACCAAGAGGCTGTGTAAG            | 78-752            | 3-582                           | PP2C                                        | TFDMS32-TYPE-I                        | 59.9                              | 245                            | 1                                                          | M                                                     | NSA                                                                                                            |
| PUIID16586201  | Ca1         | 31367623                | (TCT)8                       | 24                                | CAATGAAAGCGCTGGTATA              | GGTGCAGACTAAAACAGCCC             | 251-1480          | 153-720                         | Peptidase                                   | TFDMS33-TYPE-I                        | 59.8                              | 140                            | 1                                                          | M                                                     | NSA                                                                                                            |
| PUIID16586202  | Ca7         | 35180540                | (ATC)4                       | 12                                | TCTTGAATCCAGCAGATTAG             | TGTATTCTGCTTTTCTCTGTG            | 92-1738           | 1214-1727                       | bHLH MYC                                    | TFDMS34-TYPE-I                        | 54.8                              | 150                            | 1                                                          | M                                                     | NSA                                                                                                            |
| PUIID16586203  | Ca2         | 27922104                | (GGC)5                       | 15                                | TGGAACAACATATTGGACATACA          | ATTGCCAAAACCTTCAACCG             | 85-1777           | 123-1422                        | AMP-binding                                 | TFDMS35-TYPE-I                        | 59.3                              | 154                            | 1                                                          | M                                                     | NSA                                                                                                            |
| PUIID16586204  | 0           | 0                       | (CAA)5                       | 15                                | ATCCAACAACAACGCTTCC              | CGGAGTTCAGGAAGAATGA              | 167-2392          | 123-2175                        | DUF740                                      | TFDMS36-TYPE-I                        | 60.0                              | 163                            | 1                                                          | M                                                     | NSA                                                                                                            |
| PUIID16586205  | Ca6         | 17415710                | (GAA)5                       | 15                                | CTGTTGGCGCTTTTAACACA             | CGTCCCAAAAATATACCCCT             | 37-684            | 285-585                         |                                             | TFDMS37-TYPE-I                        | 59.9                              | 262                            | 1                                                          | M                                                     | NSA                                                                                                            |
| PUIID16586206  | Ca6         | 14690745                | (CAA)6                       | 18                                | CCATCAACCACAACCCATAAC            | AGAAGAGAGGGCGAGTAGG              | 1421371           | 318-786                         | Hyacin                                      | TFDMS38-TYPE-I                        | 60.1                              | 215                            | 1                                                          | M                                                     | NSA                                                                                                            |
| PUIID16586207  | 0           | 0                       | (GAA)5                       | 15                                | CAATTGCAGCGTCTCTCTCA             | GGAGGAATGGAACGGGAAT              | 42-1124           | 45-342                          | RWD                                         | TFDMS39-TYPE-I                        | 60.3                              | 120                            | 1                                                          | M                                                     | NSA                                                                                                            |
| PUIID16586208  | Ca2         | 18151922                | (GTT)5                       | 15                                | TGCAAAAGATGAGGAAGGGTG            | GCTCCCATTTGATTGTGGCG             | 84-1059           | 51-951                          | NAD binding                                 | TFDMS40-TYPE-I                        | 60.4                              | 214                            | 1                                                          | M                                                     | NSA                                                                                                            |
| PUIID16586209  | Ca5         | 3220268                 | (TCA)6                       | 18                                | ACCGTCTCGTCATCCCTTA              | GATTTATGGCCAAATCCCCT             | 238-1005          | 78-648                          | NAP                                         | TFDMS41-TYPE-I                        | 59.6                              | 240                            | 1                                                          | M                                                     | NSA                                                                                                            |
| PUIID16586210  | Ca6         | 36101249                | (GAT)5                       | 15                                | GTGTGGAAGAAGGCGGAAG              | AACAACAACAAACCTCCCG              | 208-1614          | 303-657                         | SPR                                         | TFDMS42-TYPE-I                        | 60.0                              | 121                            | 1                                                          | M                                                     | NSA                                                                                                            |

| NCBI Probe IDs | Chromosomes | Physical positions (bp) | Microsatellite repeat-motifs | Microsatellite repeat length (bp) | Forward Primer sequences (5'-3') | Reverse Primer sequences (5'-3') | ORF position (bp) | Functional domain position (bp) | Functional domain                   | Types of genic microsatellite markers | Actual annealing temperature (°C) | Size (bp) of alleles amplified | Total number of alleles amplified among chickpea varieties | Polymorphic potential monomorphic (M)/polymorphic (P) | R2 value of marker loci showing significant association ( $P \leq 0.05$ ) with three major seed and pod traits |
|----------------|-------------|-------------------------|------------------------------|-----------------------------------|----------------------------------|----------------------------------|-------------------|---------------------------------|-------------------------------------|---------------------------------------|-----------------------------------|--------------------------------|------------------------------------------------------------|-------------------------------------------------------|----------------------------------------------------------------------------------------------------------------|
| PUID16586211   | Ca8         | 2557055                 | (TGAT)3                      | 12                                | GCTCTAAGACCCAAATTGTTTT           | GAATCAGTGATGAAGAAGACG            | 296-1183          | 626-788                         | HomeoBox                            | TFFDMS43-TYPE-I                       | 55.2                              | 151                            | 1                                                          | M                                                     | NSA                                                                                                            |
| PUID16586212   | Ca4         | 11600566                | (TGG)5                       | 15                                | GTGGAGCTGATAAGATGGTGAG           | CAGCCATAACCTTTTGATACAG           | 102-1448          | 450-719                         | Myb DNA binding                     | TFFDMS44-TYPE-I                       | 54.6                              | 155                            | 1                                                          | M                                                     | NSA                                                                                                            |
| PUID16586213   | 0           | 0                       | (GGT)4                       | 12                                | GTAGTGTAACCTGCCTCAAAA            | GAAGGTTTTTTGTATGCGCAAC           | 677               | 201-677                         | Med7                                | TFFDMS45-TYPE-I                       | 54.7                              | 150                            | 1                                                          | M                                                     | NSA                                                                                                            |
| PUID16586214   | Ca4         | 3369236                 | (GGT)4                       | 12                                | AACCTGAAGAGAGACAGAGCTT           | TCATTCAGATCTTCCTTGTTG            | 182-904           | 212-877                         | AUX-IAA                             | TFFDMS46-TYPE-I                       | 55.0                              | 152                            | 1                                                          | M                                                     | NSA                                                                                                            |
| PUID16586215   | Ca3         | 18495957                | (TCT)4                       | 12                                | TACAACTCTTTCTGCACCTGT            | TGAAATTGGTAGTGGTTGTAGA           | 1-271             | 122-254                         | Myb DNA binding                     | TFFDMS47-TYPE-I                       | 55.1                              | 161                            | 1                                                          | M                                                     | NSA                                                                                                            |
| PUID16586216   | Ca1         | 47285537                | (AGA)4                       | 12                                | GAGACTACCGACATGGAAG              | ACCATACATTCTCAAAACAGA            | 5-153             | 5-150                           | DUF822                              | TFFDMS48-TYPE-I                       | 54.8                              | 100                            | 1                                                          | M                                                     | NSA                                                                                                            |
| PUID16586217   | Ca6         | 56151673                | (GAA)4                       | 12                                | CAGACTTCGATGGTTGAATTA            | TATCTCATGGCTGTTCTTCC             | 139-351           | 166-303                         | Myb DNA binding                     | TFFDMS49-TYPE-I                       | 55.4                              | 154                            | 1                                                          | M                                                     | NSA                                                                                                            |
| PUID16586218   | Ca2         | 29204228                | (TTGT)3                      | 12                                | GTTGTTGGTATCGATGATT              | TACTCAAGCAAGTGAGTAGGC            | 857-1757          | 1503-1640                       | PHD                                 | TFFDMS50-TYPE-I                       | 54.9                              | 160                            | 2                                                          | P                                                     | NSA                                                                                                            |
| PUID16586219   | Ca2         | 1682568                 | (AAT)5                       | 15                                | TTAATGTTGCTTGTGGGGGT             | AAAGCCATTGGAACAAAACG             | 162-1277          | 27-597                          | Peptidase                           | TFFDMS51-TYPE-I                       | 60.2                              | 259                            | 2                                                          | P                                                     | NSA                                                                                                            |
| PUID16586220   | Ca6         | 3418800                 | (GAGAAA)5                    | 30                                | TCAGACGGTTTTGGTTTTCC             | TTGGGAAAACCTTGTTCGAGG            | 197-1165          | 228-783                         | Lipase GDSL                         | TFFDMS52-TYPE-I                       | 59.9                              | 264                            | 3                                                          | P                                                     | NSA                                                                                                            |
| PUID16586221   | Ca6         | 5765009                 | (CCA)8                       | 24                                | ACATTGTTGGTCGTGTTTCC             | GGGTGATGTTGGAAGGATGA             | 375-1433          | 252-933                         | Branch                              | TFFDMS53-TYPE-I                       | 59.5                              | 259                            | 3                                                          | P                                                     | NSA                                                                                                            |
| PUID16586222   | Ca2         | 36340571                | (TGG)5                       | 15                                | GACGGAGACGAAGGAGTGTC             | CAGCACGATAAGCATCAGGA             | 140-1336          | 279-1194                        | Coprogen                            | TFFDMS54-TYPE-I                       | 59.8                              | 247                            | 3                                                          | P                                                     | NSA                                                                                                            |
| PUID16586223   | Ca7         | 32855067                | (TGT)5                       | 15                                | TGGTGCCACTACCAAAGA               | TTTCCAGAACTTCAGGGTCA             | 145-1233          | 228-360                         | WRC                                 | TFFDMS55-TYPE-I                       | 60.1                              | 252                            | 5                                                          | P                                                     | NSA                                                                                                            |
| PUID16586224   | Ca1         | 7419551                 | (ACC)4                       | 12                                | AAGACTTCCATCTTCCAACT             | CTGCCGATGTATTGATGTATT            | 30-2006           | 1-564                           | START                               | TFFDMS56-TYPE-I                       | 54.6                              | 154                            | 3                                                          | P                                                     | NSA                                                                                                            |
| PUID16586225   | Ca7         | 17777145                | (ATGG)3                      | 12                                | AGGTTTACCATCAGCTTCACT            | CATTCTCTAAGGAGACACACA            | 428-1636          | 1043-1531                       | MFMR                                | TFFDMS57-TYPE-I                       | 55.6                              | 157                            | 3                                                          | P                                                     | NSA                                                                                                            |
| PUID16586226   | Ca1         | 26026300                | (TCC)4                       | 12                                | TAGCTACTTCCCCTTCTTCA             | TGTAGCAGGTTTCATGTTCTT            | 253-3357          | 2689-3213                       | SBP                                 | TFFDMS58-TYPE-I                       | 55.9                              | 152                            | 3                                                          | P                                                     | NSA                                                                                                            |
| PUID16586227   | Ca4         | 13333701                | (CAC)5                       | 15                                | CATCCTCGACAAACCCCTTA             | TTCAAATTCCCTTGTTGGAGG            | 186-1187          | 320-525                         | lily                                | TFFDMS59-TYPE-I                       | 59.9                              | 243                            | 3                                                          | P                                                     | NSA                                                                                                            |
| PUID16586228   | Ca2         | 28230844                | (TTC)10                      | 30                                | TCTTTGGCTTTCACCTCCCTC            | GGTGGAAGCGGTTATTGAGA             | 231-2345          | 135-738                         | Luciferin                           | TFFDMS60-TYPE-I                       | 59.6                              | 227                            | 2                                                          | P                                                     | NSA                                                                                                            |
| PUID16586229   | Ca6         | 16493630                | (CAA)8                       | 24                                | GAGCTACCAAAACCTCATCACA           | AATGGCGAGGTTGAGATTTG             | 105-959           | 150-318                         | zf-Dof                              | TFFDMS61-TYPE-I                       | 59.2                              | 157                            | 4                                                          | P                                                     | NSA                                                                                                            |
| PUID16586230   | Ca6         | 5237510                 | (CAA)5                       | 15                                | TGTGTTTTCCCTTGTGAAGGT            | GAAAGTCTTGTGCAGGAGCC             | 49-1863           | 525-927                         | POX                                 | TFFDMS62-TYPE-I                       | 59.5                              | 223                            | 2                                                          | P                                                     | NSA                                                                                                            |
| PUID16586231   | Ca5         | 26146967                | (CAC)5                       | 15                                | ACACAATCCATCAGAACCCT             | TTTTCCCAAACATGATCGAGG            | 255-956           | 147-486                         | DUF640                              | TFFDMS63-TYPE-I                       | 59.6                              | 254                            | 2                                                          | P                                                     | NSA                                                                                                            |
| PUID16586232   | Ca1         | 16385748                | (TTG)6                       | 18                                | CTGTGGCTGTGCTGTCTGTT             | ATTGTTGTGGGCTGAGGAAT             | 145-1464          | 48-447                          | Cyclin                              | TFFDMS64-TYPE-I                       | 60.1                              | 217                            | 5                                                          | P                                                     | NSA                                                                                                            |
| PUID16586233   | Ca5         | 7861188                 | (CAT)6                       | 18                                | CCTCAACCAATCAACACCA              | GCATTGACTAATGATGGTGGG            | 59-949            | 294-843                         | DUF579                              | TFFDMS65-TYPE-I                       | 59.4                              | 129                            | 3                                                          | P                                                     | NSA                                                                                                            |
| PUID16586234   | Ca5         | 2855431                 | (TGA)6                       | 18                                | ACACCCCAAGTCTGTTCAGG             | GCAAGAAGTTAACGAGATGCG            | 1-794             | 558-690                         | zf-C3HC4                            | TFFDMS66-TYPE-I                       | 60.0                              | 228                            | 4                                                          | P                                                     | NSA                                                                                                            |
| PUID16586235   | Ca7         | 47173107                | (ATA)5                       | 15                                | TGGTGGTTCTAATGAAGTAA             | CAGCATCTTGATGACAGAAGC            | 13-981            | 352-852                         | Domain of unknown function (DUF702) | TFFDMS67-TYPE-I                       | 55.9                              | 155                            | 3                                                          | P                                                     | NSA                                                                                                            |
| PUID16586236   | Ca7         | 29125055                | (TCT)6                       | 18                                | TAGAGTTGGGCGAGGATTG              | ATTCCAAGCGACGAGTTGT              | 91-1065           | 339-939                         | Methyltransf                        | TFFDMS68-TYPE-I                       | 60.2                              | 275                            | 5                                                          | P                                                     | NSA                                                                                                            |
| PUID16586237   | Ca5         | 27118508                | (GAAA)3                      | 12                                | AGCTATGCCCTCGATAAACT             | GAGTAGTGGCTCTGTTTGAA             | 75-1238           | 841-773                         | hZIP                                | TFFDMS69-TYPE-I                       | 55.0                              | 167                            | 2                                                          | P                                                     | NSA                                                                                                            |
| PUID16586238   | Ca3         | 39398787                | (ATC)8                       | 24                                | ACCGTTCTCTAGGACGACCA             | TGAGTGAAGATGATGACGGG             | 358-1953          | 252-1266                        | PORR                                | TFFDMS70-TYPE-I                       | 59.7                              | 216                            | 3                                                          | P                                                     | NSA                                                                                                            |
| PUID16586239   | Ca7         | 2833265                 | (AGC)5                       | 15                                | TGAATCAGTTGAGAGTGCGG             | AAAGTGTCTGGGGCCTTTT              | 75-875            | 390-483                         | GATA                                | TFFDMS71-TYPE-I                       | 60.0                              | 212                            | 2                                                          | P                                                     | NSA                                                                                                            |
| PUID16586240   | Ca5         | 47841226                | (AGA)5                       | 15                                | GGTTGGCTTGCTGTTCGAAGT            | GAAGTTTGAGAGGACCGTCG             | 56-379            | 3-243                           | Auxin                               | TFFDMS72-TYPE-I                       | 60.3                              | 166                            | 2                                                          | P                                                     | NSA                                                                                                            |
| PUID16586241   | Ca6         | 36101249                | (GAT)5                       | 15                                | GTGTGGAAGAAAGCGGAAAG             | AACAACAACAAACCTCCCG              | 208-1614          | 303-657                         | SPRY                                | TFFDMS73-TYPE-I                       | 60.0                              | 121                            | 2                                                          | P                                                     | NSA                                                                                                            |
| PUID16586242   | 0           | 0                       | (CTT)4                       | 12                                | ATTATCCTTGAGGTCGATGT             | GAATCAGAAGCTCAATGGA              | 302-1060          | 893-1048                        | Myb DNA binding                     | TFFDMS74-TYPE-I                       | 55.3                              | 152                            | 2                                                          | P                                                     | NSA                                                                                                            |

NSA Not Significantly Associated  
 NV Not Validated
