# Supplementary material for: Functionally Relevant Microsatellite Markers From Chickpea Transcription Factor Genes for Efficient Genotyping Applications and Trait Association Mapping
Source: PubMed Central journal article supplement — DNA Res. 2013 Apr 29;20(4):355–74. doi: 10.1093/dnares/dst015 (PMC3738162; doi:10.1093/dnares/dst015), 2013-04-29
Supplement: supp_dst015_dst015supp_table3.pdf [file supp_dst015_dst015supp_table3.pdf]

**Supplementary Table S3: Distribution and map density of physically mapped TFGMS and TFFDMS markers on the eight chickpea chromosomes**

| <b>Chromosomes</b> | <b>Size (Mb) of chromosomes (Pseudomolecules)</b> | <b>Markers mapped (%)</b> | <b>Average map density (kb)</b> |
|--------------------|---------------------------------------------------|---------------------------|---------------------------------|
| CaChr1             | 48.36                                             | 165 (14.4)                | 293.1                           |
| CaChr2             | 36.63                                             | 91 (7.9)                  | 402.5                           |
| CaChr3             | 39.99                                             | 148 (12.9)                | 270.2                           |
| CaChr4             | 49.19                                             | 174 (15.2)                | 282.7                           |
| CaChr5             | 48.17                                             | 164 (14.3)                | 293.7                           |
| CaChr6             | 59.46                                             | 154 (13.7)                | 386.1                           |
| CaChr7             | 48.96                                             | 163 (14.2)                | 300.4                           |
| CaChr8             | 16.48                                             | 84 (7.3)                  | 196.2                           |
| <b>Total</b>       | <b>347.24</b>                                     | <b>1143</b>               | <b>303.8</b>                    |
