# Supplementary material for: Functionally Relevant Microsatellite Markers From Chickpea Transcription Factor Genes for Efficient Genotyping Applications and Trait Association Mapping
Source: PubMed Central journal article supplement — DNA Res. 2013 Apr 29;20(4):355–74. doi: 10.1093/dnares/dst015 (PMC3738162; doi:10.1093/dnares/dst015), 2013-04-29
Supplement: supp_dst015_dst015supp_table4.pdf [file supp_dst015_dst015supp_table4.pdf]

**Supplementary Table S4: Microsatellite markers mapped on the eight LGs of an intra-specific functional transcript map/genetic linkage map of chickpea**

| <b>LGs</b>   | <b>Mapped TFGMS and TFFDMS + genomic microsatellite markers</b> | <b>Map length covered (cM)</b> | <b>Average inter-marker distance (cM)</b> |
|--------------|-----------------------------------------------------------------|--------------------------------|-------------------------------------------|
| LG1          | 20 + 4 = 24                                                     | 121.7                          | 5.07                                      |
| LG2          | 14 + 4 = 18                                                     | 113.4                          | 6.30                                      |
| LG3          | 12 + 4 = 16                                                     | 106.7                          | 6.67                                      |
| LG4          | 10 + 4 = 14                                                     | 89.9                           | 6.42                                      |
| LG5          | 10 + 4 = 14                                                     | 86.5                           | 6.18                                      |
| LG6          | 9 + 4 = 13                                                      | 84.6                           | 6.51                                      |
| LG7          | 11 + 4 = 15                                                     | 101.3                          | 6.75                                      |
| LG8          | 10 + 4 = 14                                                     | 78.7                           | 5.62                                      |
| <b>Total</b> | <b>96 + 32 = 128</b>                                            | <b>782.8</b>                   | <b>6.12</b>                               |
